# Supplementary material for: Engineering organic semiconducting solids. Multicomponent access to crystalline 3-(4-aryl-1,2,3-triazolyl)coumarins
Source: Royal Society of Chemistry journal article supplement (doi:10.1039/c6ce01041e), 2016-01-01

## Electronic supporting information for the paper titled:

### Engineering organic semiconducting solids. Multicomponent access to crystalline 3-(4-aryl-1,2,3-triazolyl)coumarins.

Authored by: José Emilio del Cerda-Pedro, Rafael Arcos-Ramos, Mauricio Maldonado-Domínguez, Susana Rojas-Lima, Margarita Romero-Ávila, María del Pilar Carreón-Castro, Rosa Santillan, Norberto Farfán and Heraclio López-Ruiz.

| Content                                                                                                  | Page |
|----------------------------------------------------------------------------------------------------------|------|
| 1. Reaction optimization experiments                                                                     | 2    |
| 2. Crystallographic data and SXRD studies of coumarins <b>5a-c</b> , <b>5f</b> , <b>5h</b> , <b>5j-l</b> | 3    |
| 3. Absorption and emission profiles of coumarins <b>5a-l</b>                                             | 4    |
| 4. Calculated UV/Vis excitations of coumarins                                                            | 7    |
| 5. Band structures derived through plane-wave DFT for <b>5a-l</b>                                        | 14   |
| 6. <sup>1</sup> H and <sup>13</sup> C NMR spectra of coumarins <b>5a-l</b>                               | 23   |

## Reaction optimization experiments

| Entry | CuI (mol %) | Piperidine (mol %) | Time (h) | Yield <sup>b</sup> (%) |
|-------|-------------|--------------------|----------|------------------------|
| 1     | 0.1         | ----               | 24       | No reaction            |
| 2     | ----        | 1.25               | 24       | No reaction            |
| 3     | 0.05        | 0.6                | 4        | 32                     |
| 4     | 0.1         | 1.25               | 4        | 89                     |
| 5     | 0.1         | 2.5                | 4        | 84                     |
| 6     | 0.2         | 1.25               | 4        | 80                     |

**Table S1.** Catalyst screening for the synthesis of **5a**.

<sup>a</sup> Reaction conditions: Salicylaldehyde (1 equiv), ethyl bromoacetate (1.5 equiv), NaN<sub>3</sub> (3.0 equiv), phenylacetylene (1.0 equiv) and piperidine (1.25 equiv) in *i*PrOH:DMF (3:1) at 80 °C.

<sup>b</sup> Products purified by crystallization.

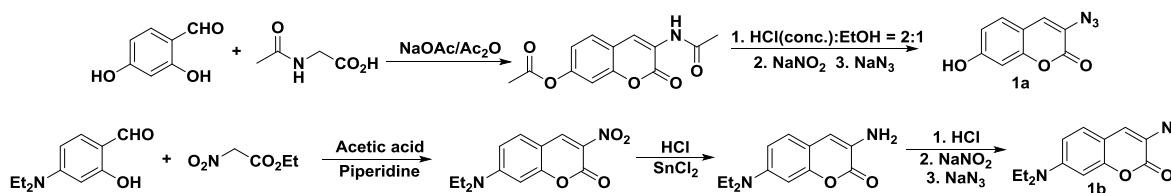

**Scheme S1.** Synthesis of 3-azidocoumarins **1a-b**

A proposal of the plausible reaction sequence is shown in Scheme S2. The reaction may be rationalized by the initial Huisgen 1,3-dipolar cycloaddition between the acetylene group with ethyl 2-azidoacetate (**A**) to produce the corresponding 1,2,3-triazole intermediate (**B**). Then, a nucleophilic attack of the phenolic group (influenced by the presence of electron donating groups in relative 1,4-position) onto the carbonyl moiety of the 1,2,3-triazole intermediate leads to the formation of the 2-formylaryl precursor (**C**). Finally, condensation of salicylaldehyde or its derivatives with acetate derivatives in the presence of piperidine, leads the formation of the title ATCs.

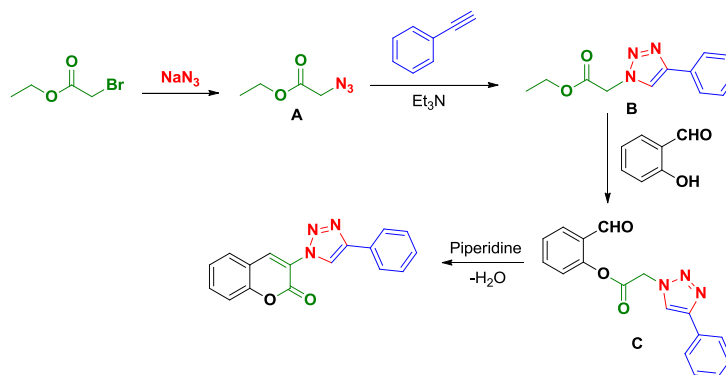

**Scheme S2.** Probable sequence leading to ATCs in the studied multicomponent reaction.

## Crystallographic Data and X-Ray Diffraction studies of compounds 5a-c, 5f, 5h, 5j-l

**Table S2.** Selected dihedral angles (°) for 3-[1,2,3-triazo-yl]coumarins 5a, 5b, 5c, 5f, 5h, 5j, 5k and 5l

| Compound | Mean Planes | Dihedral angle (°) |
|----------|-------------|--------------------|
| 5a       | 1-2         | 5.8                |
|          | 1-3         | 2.4                |
|          | 2-3         | 7.7                |
| 5b       | 1-2         | 11.4               |
|          | 1-3         | 27.6               |
|          | 2-3         | 18.1               |
| 5c       | 1-2         | 21.5               |
|          | 1-3         | 12.3               |
|          | 2-3         | 13.0               |
| 5f       | 1-2         | 18.6               |
|          | 1-3         | 19.7               |
|          | 2-3         | 1.6                |
| 5h       | 1-2         | 5.9                |
|          | 1-3         | 1.6                |
|          | 2-3         | 7.1                |
| 5j       | 1-2         | 5.9                |
|          | 1-3         | 1.0                |
|          | 2-3         | 6.9                |
| 5k       | 1-2         | 11.3               |
|          | 1-3         | 6.4                |
|          | 2-3         | 5.3                |
| 5l       | 1-2         | 1.2                |
|          | 1-3         | 1.0                |
|          | 2-3         | 1.2                |

## Absorption and emission profiles of coumarins 5a-l

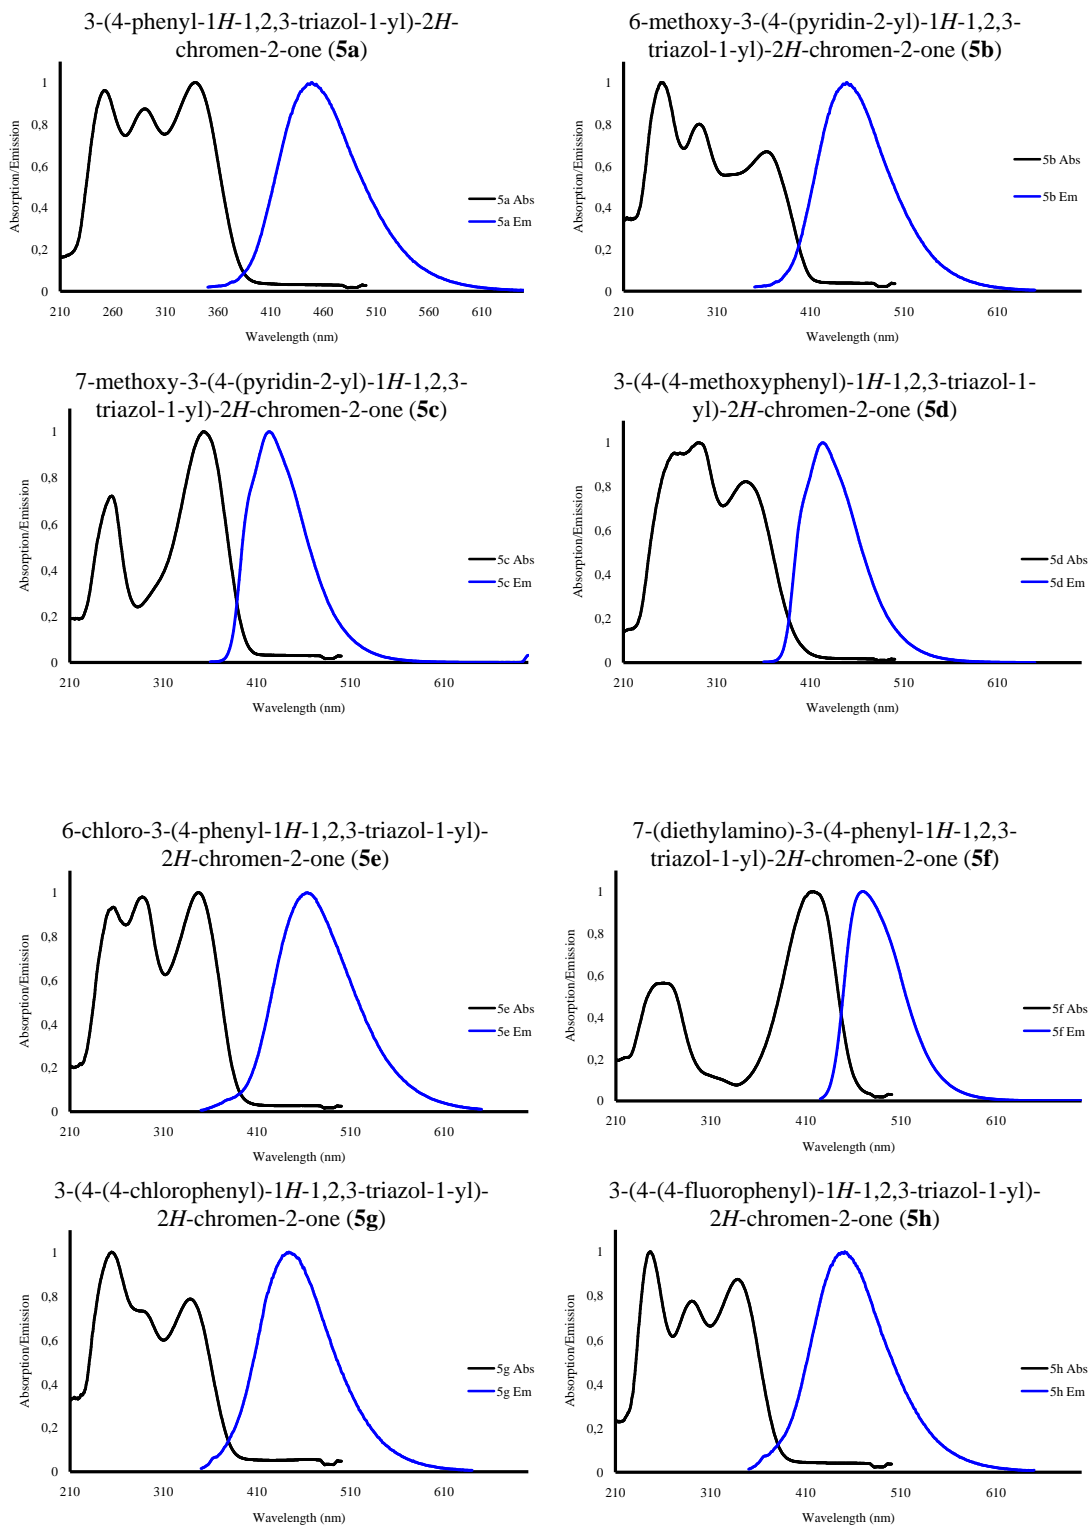

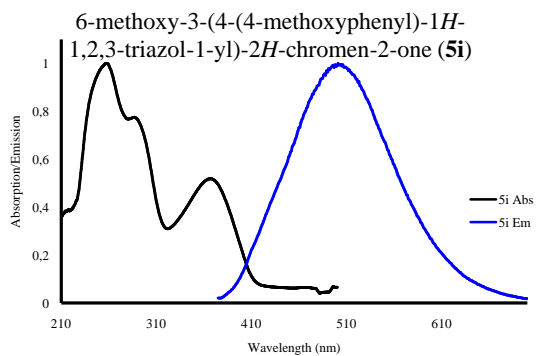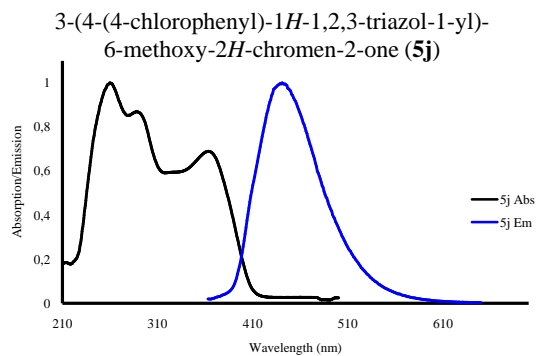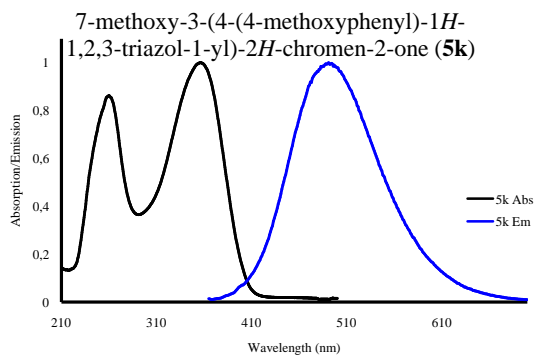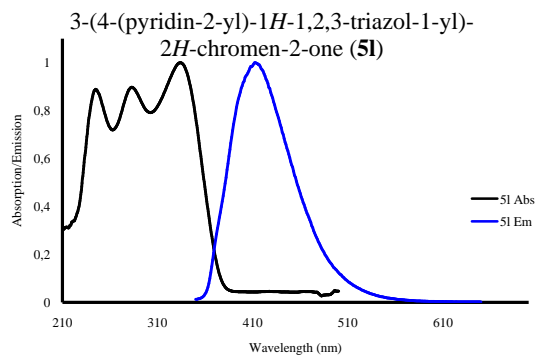

Reference molecules, selected for theoretical benchmarking.

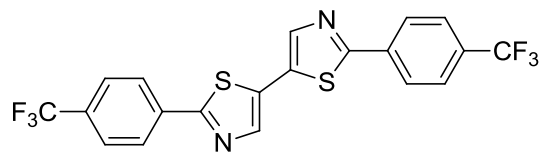

**6a**

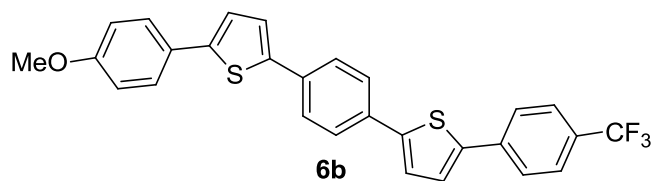

**6b**

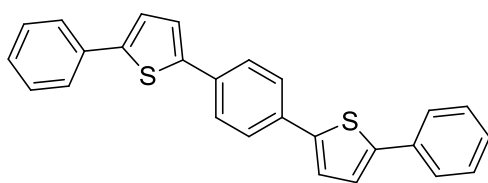

**6c**

Benchmarking study for selection of theoretical methods (Mean squared errors included)

Reference 6a

|              | HOMO  | LUMO  | GAP  | MSE GAP | MSE HOMO | MSE LUMO |
|--------------|-------|-------|------|---------|----------|----------|
| HF 3-21      | -8.35 | 1.18  | 9.53 | 43.98   | 7.41     | 15.28    |
| HF 6-31+G(d) | -8.10 | 0.90  | 8.99 | 37.14   | 6.09     | 13.15    |
| MP2          | -8.10 | 0.90  | 8.99 | 37.14   | 6.09     | 13.15    |
| b3lyp        | -6.27 | -2.41 | 3.86 | 0.92    | 0.41     | 0.10     |
| pbepbe       | -5.63 | -3.00 | 2.63 | 0.07    | 0.00     | 0.07     |
| wb97xd       | -8.08 | -0.65 | 7.44 | 20.58   | 6.01     | 4.34     |
| m062x        | -7.46 | -1.57 | 5.89 | 8.93    | 3.34     | 1.35     |
| Reported     | -5.63 | -2.73 | 2.90 | 0.00    | 0.00     | 0.00     |

Reference 6b

|              | HOMO  | LUMO  | GAP  | MSE GAP | MSE HOMO | MSE LUMO |
|--------------|-------|-------|------|---------|----------|----------|
| HF 3-21      | -6.97 | 0.97  | 7.94 | 21.58   | 3.28     | 8.03     |
| HF 6-31+G(d) | -6.86 | 0.74  | 7.60 | 18.53   | 2.90     | 6.77     |
| MP2          | -6.86 | 0.74  | 7.60 | 18.53   | 2.90     | 6.77     |
| b3lyp        | -5.29 | -2.29 | 3.00 | 0.09    | 0.02     | 0.19     |
| pbepbe       | -4.73 | -2.79 | 1.94 | 1.86    | 0.19     | 0.87     |
| wb97xd       | -7.00 | -0.68 | 6.32 | 9.12    | 3.39     | 1.39     |
| m062x        | -6.43 | -1.60 | 4.83 | 2.34    | 1.60     | 0.07     |
| Reported     | -5.16 | -1.86 | 3.30 | 0.00    | 0.00     | 0.00     |

Reference 6c

|              | HOMO  | LUMO  | GAP  | MSE GAP | MSE HOMO | MSE LUMO |
|--------------|-------|-------|------|---------|----------|----------|
| HF 3-21      | -7.45 | 0.74  | 8.19 | 22.98   | 3.76     | 8.15     |
| HF 6-31+G(d) | -7.31 | 0.54  | 7.85 | 19.79   | 3.24     | 7.01     |
| MP2          | -7.31 | 0.54  | 7.85 | 19.79   | 3.24     | 7.01     |
| b3lyp        | -5.72 | -2.53 | 3.19 | 0.04    | 0.04     | 0.17     |
| pbepbe       | -5.16 | -3.04 | 2.12 | 1.64    | 0.12     | 0.87     |
| wb97xd       | -7.44 | -0.89 | 6.55 | 9.90    | 3.71     | 1.49     |
| m062x        | -6.86 | -1.81 | 5.05 | 2.72    | 1.82     | 0.09     |
| Reported     | -5.51 | -2.11 | 3.40 | 0.00    | 0.00     | 0.00     |

UV-Vis excitations for compounds **5a** and **5b**, derived through TDDFT, at the B3LYP/6-31+G(d) level in dichloromethane

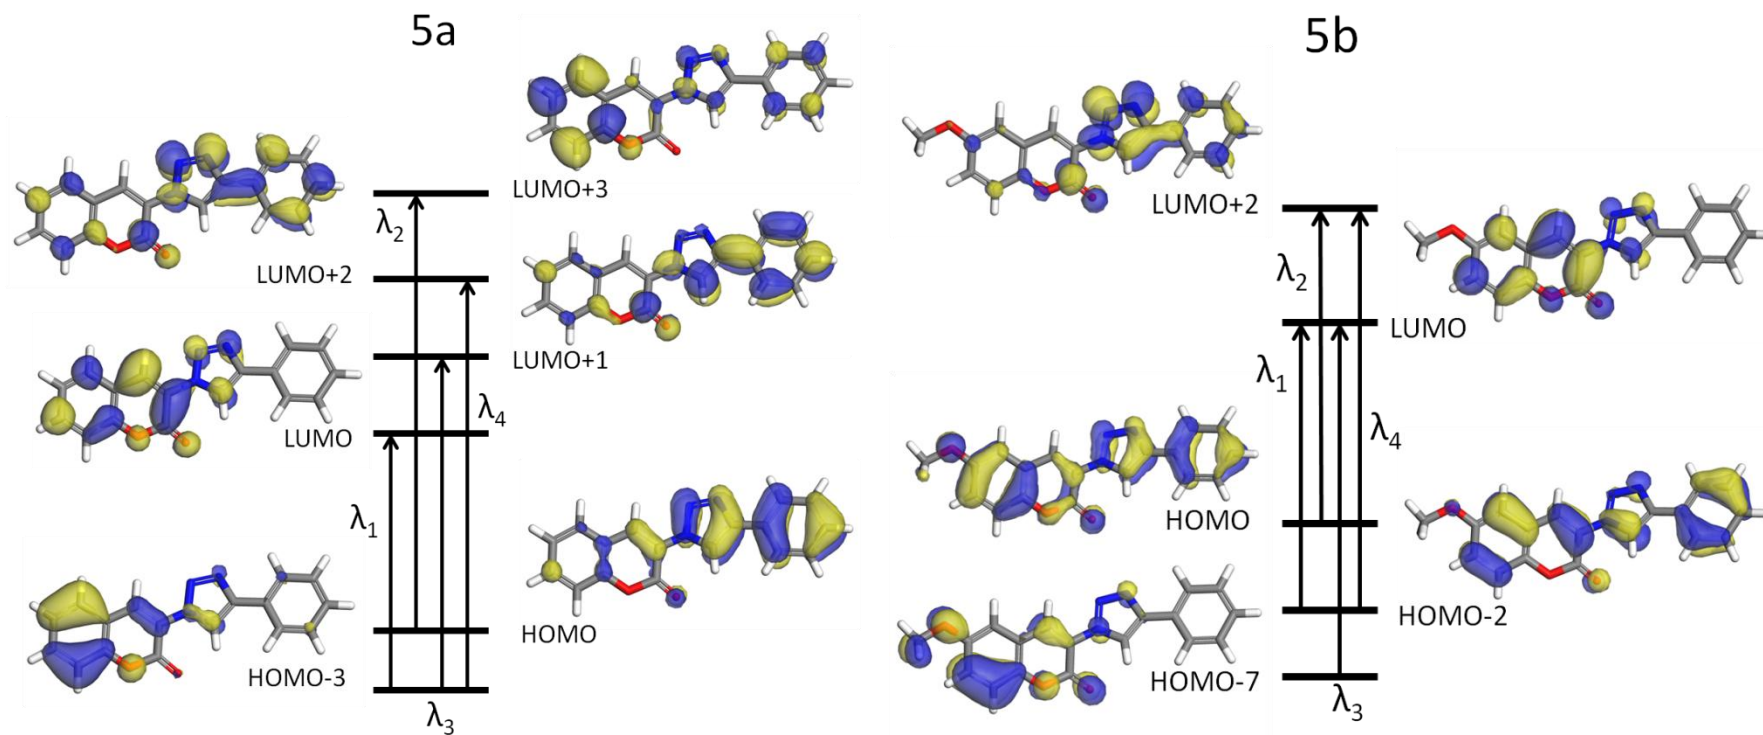



UV-Vis excitations for compounds **5c** and **5d**, derived through TDDFT, at the B3LYP/6-31+G(d) level in dichloromethane

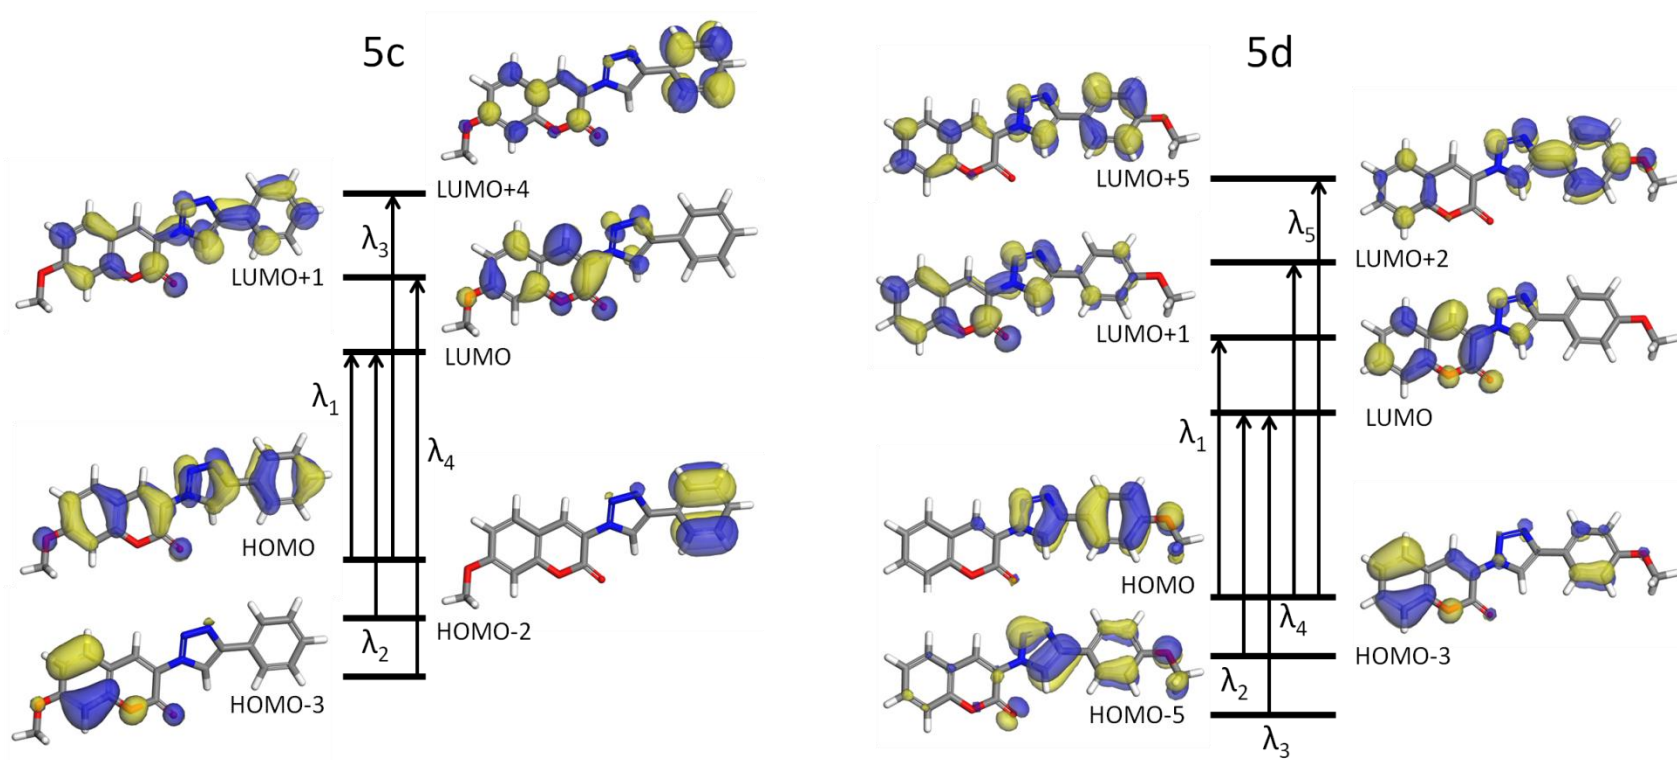

UV-Vis excitations for compounds **5e** and **5f**, derived through TDDFT, at the B3LYP/6-31+G(d) level in dichloromethane

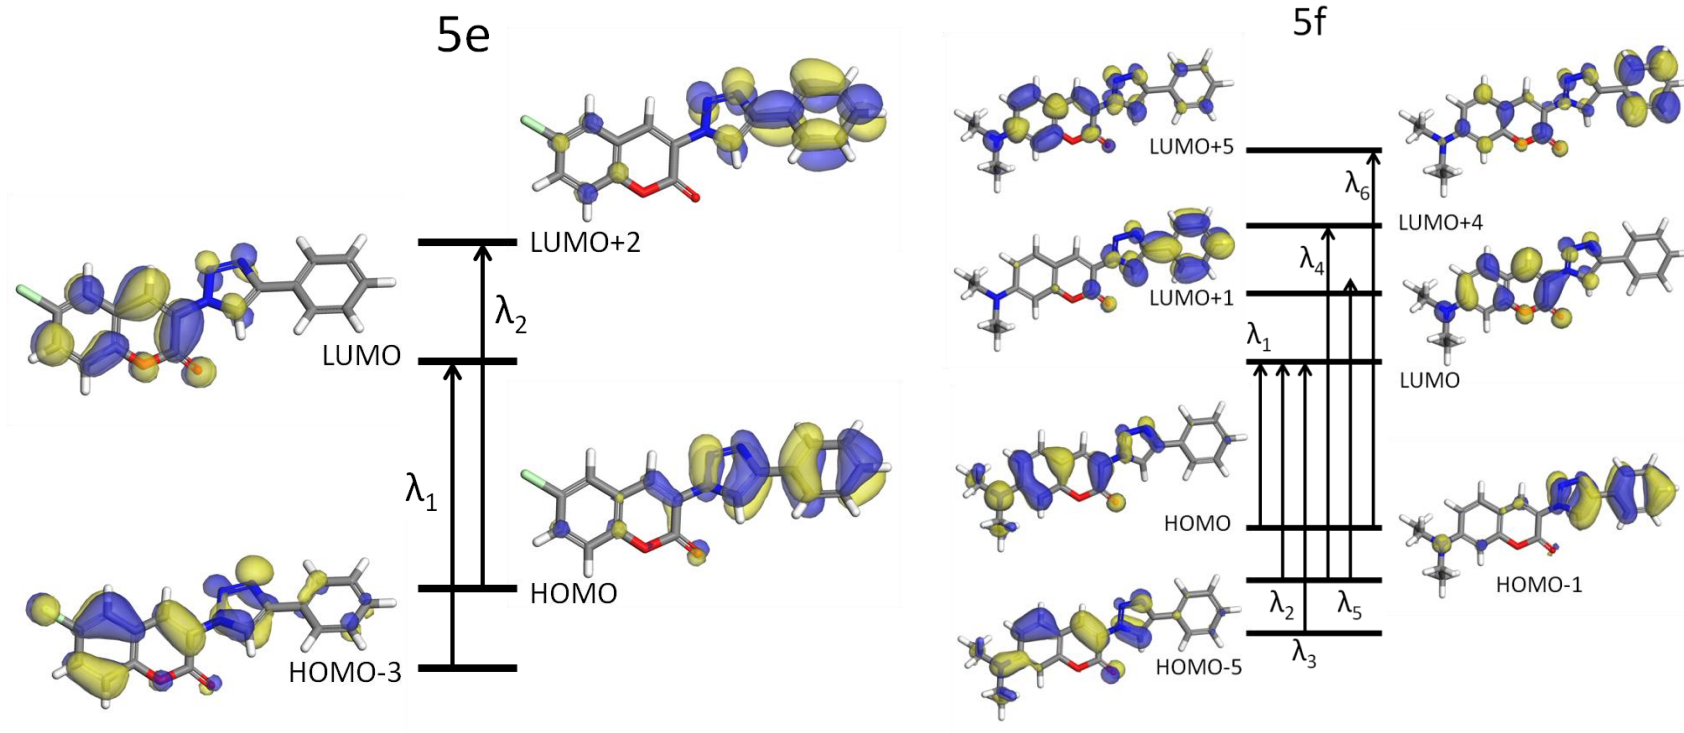

UV-Vis excitations for compounds **5g** and **5h**, derived through TDDFT, at the B3LYP/6-31+G(d) level in dichloromethane

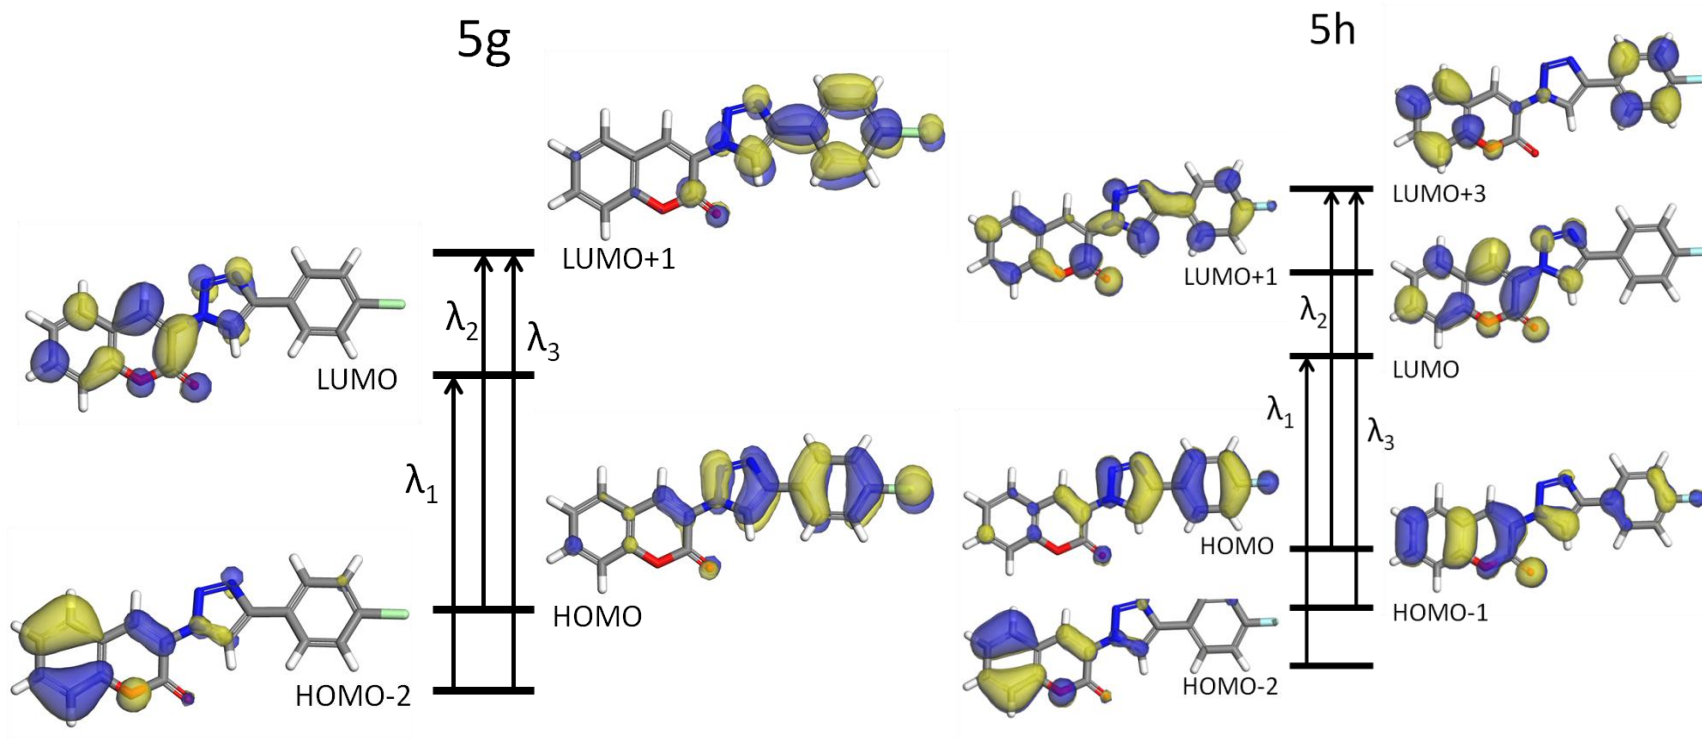

UV-Vis excitations for compounds **5i** and **5j**, derived through TDDFT, at the B3LYP/6-31+G(d) level in dichloromethane

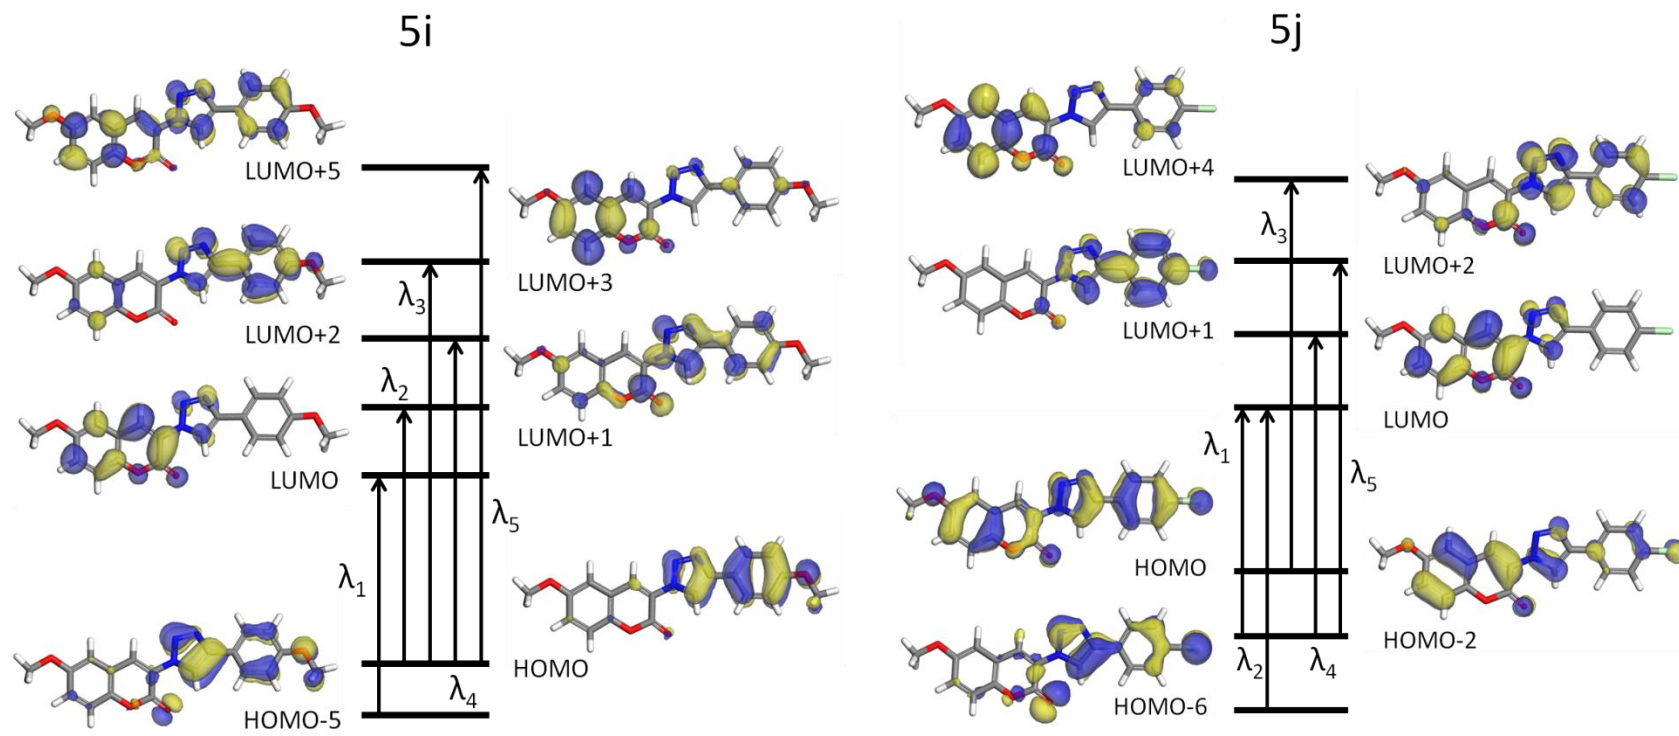

UV-Vis excitations for compounds **5k** and **5l**, derived through TDDFT, at the B3LYP/6-31+G(d) level in dichloromethane

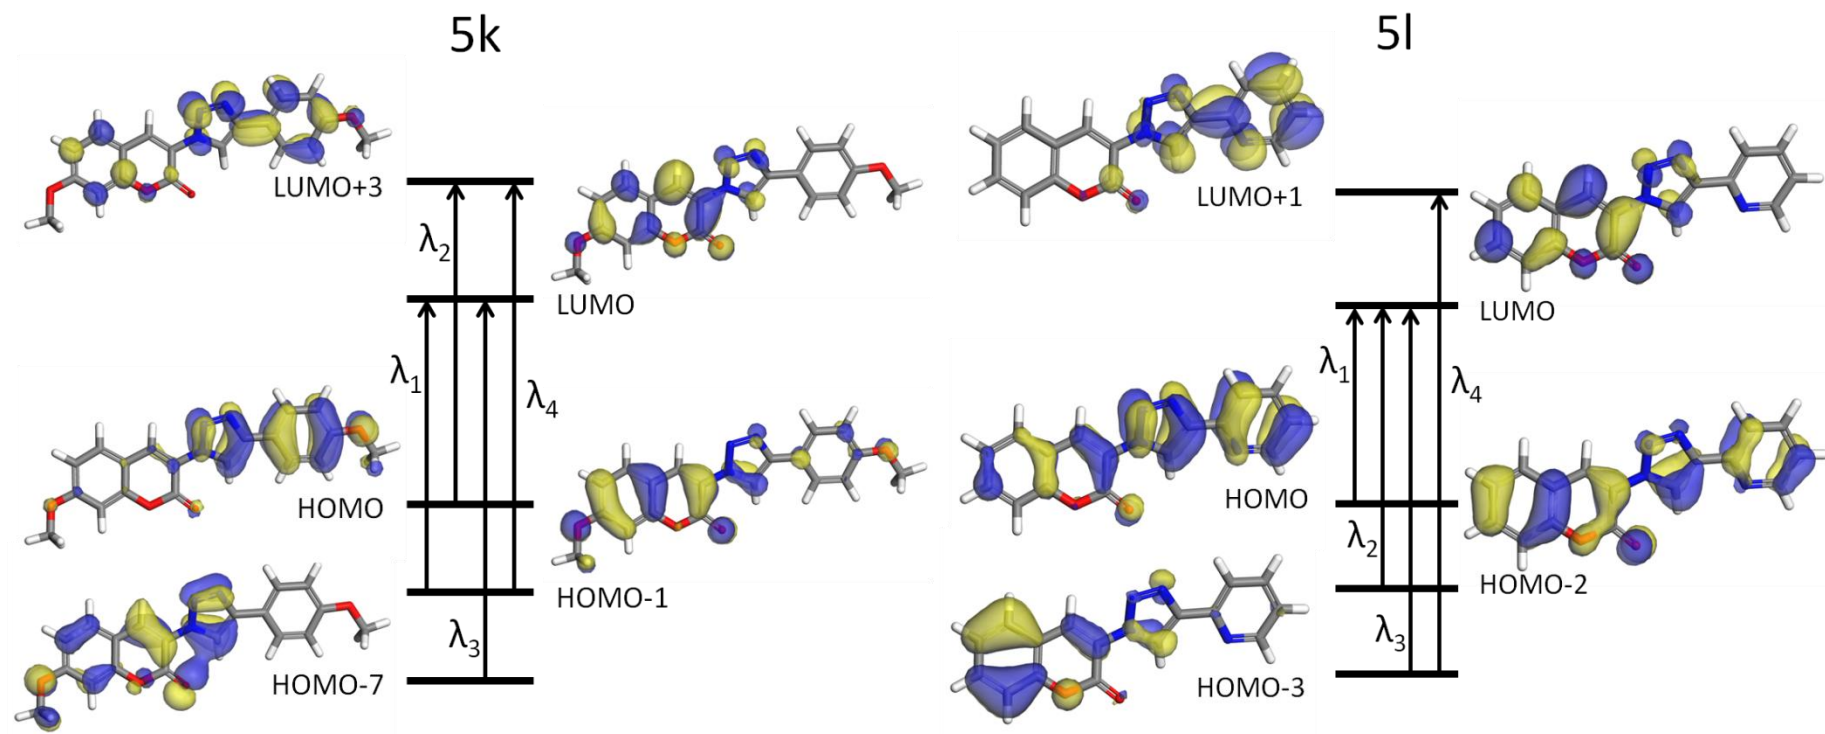

Unit cell of single crystal of **5a**, and band structure derived through plane-wave DFT, at the HSE06 level, with 850 eV cutoff

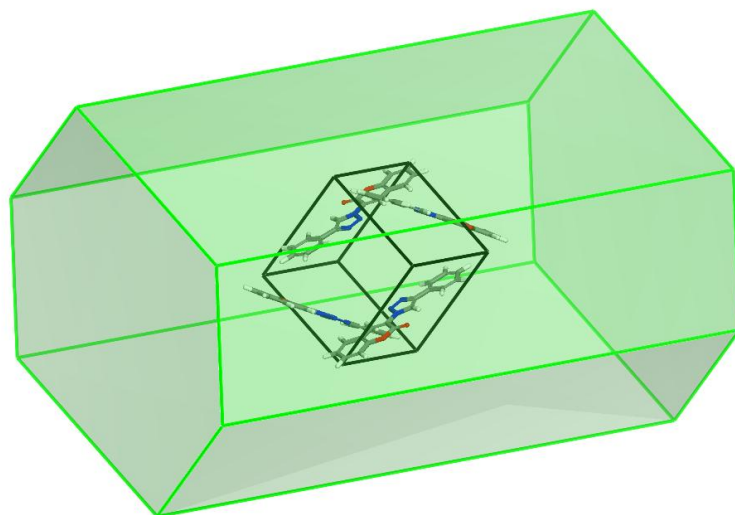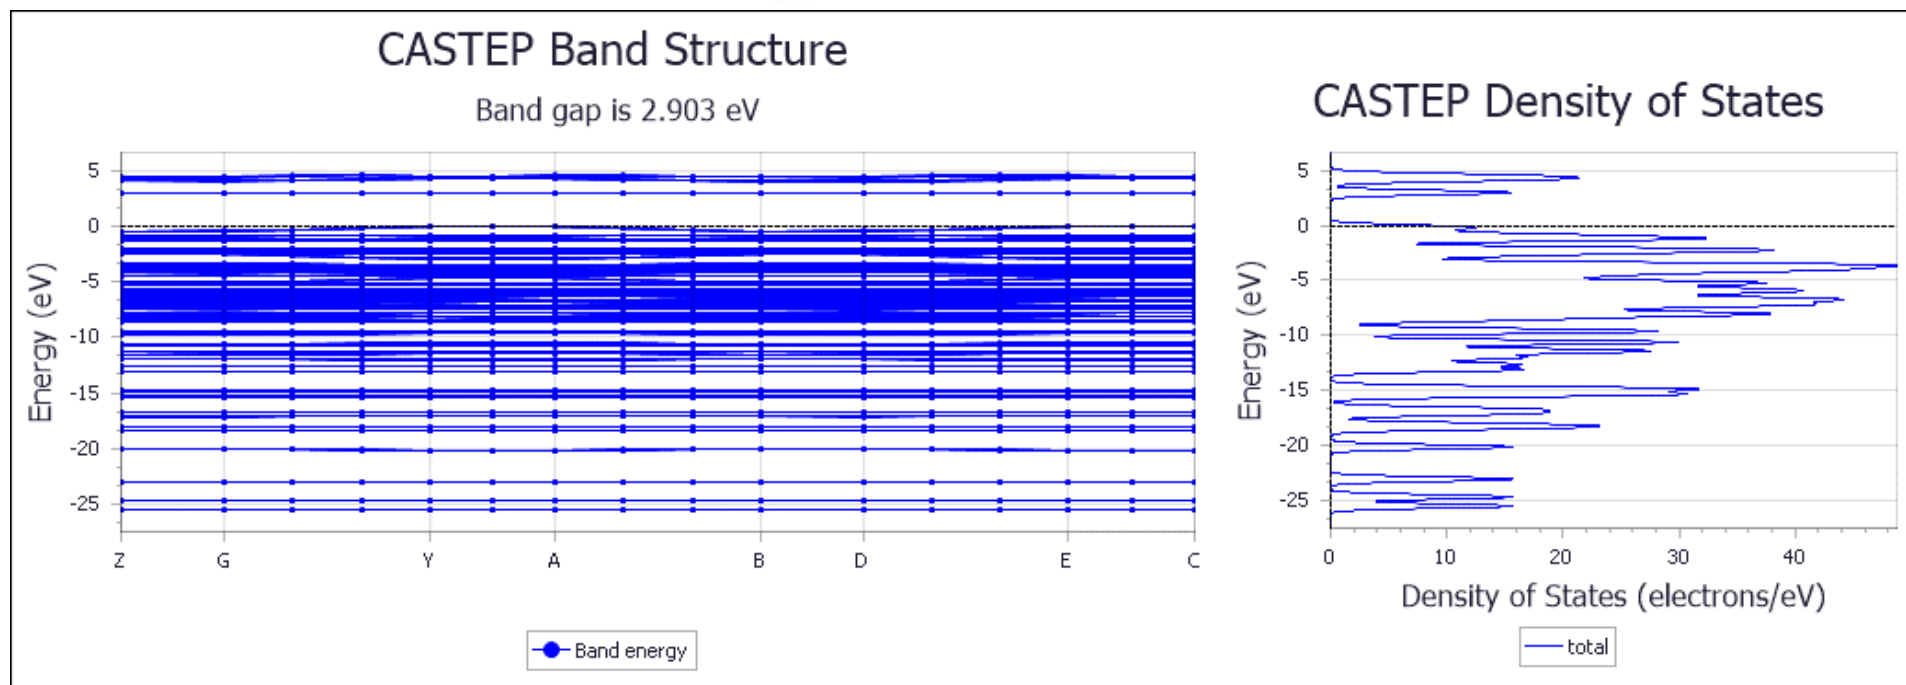

Unit cell of single crystal of **5b**, and band structure derived through plane-wave DFT, at the HSE06 level, with 850 eV cutoff

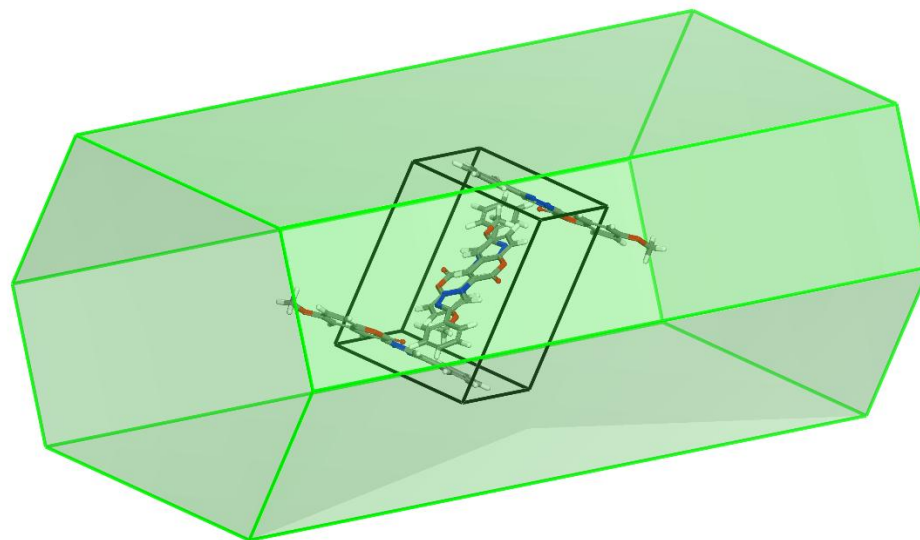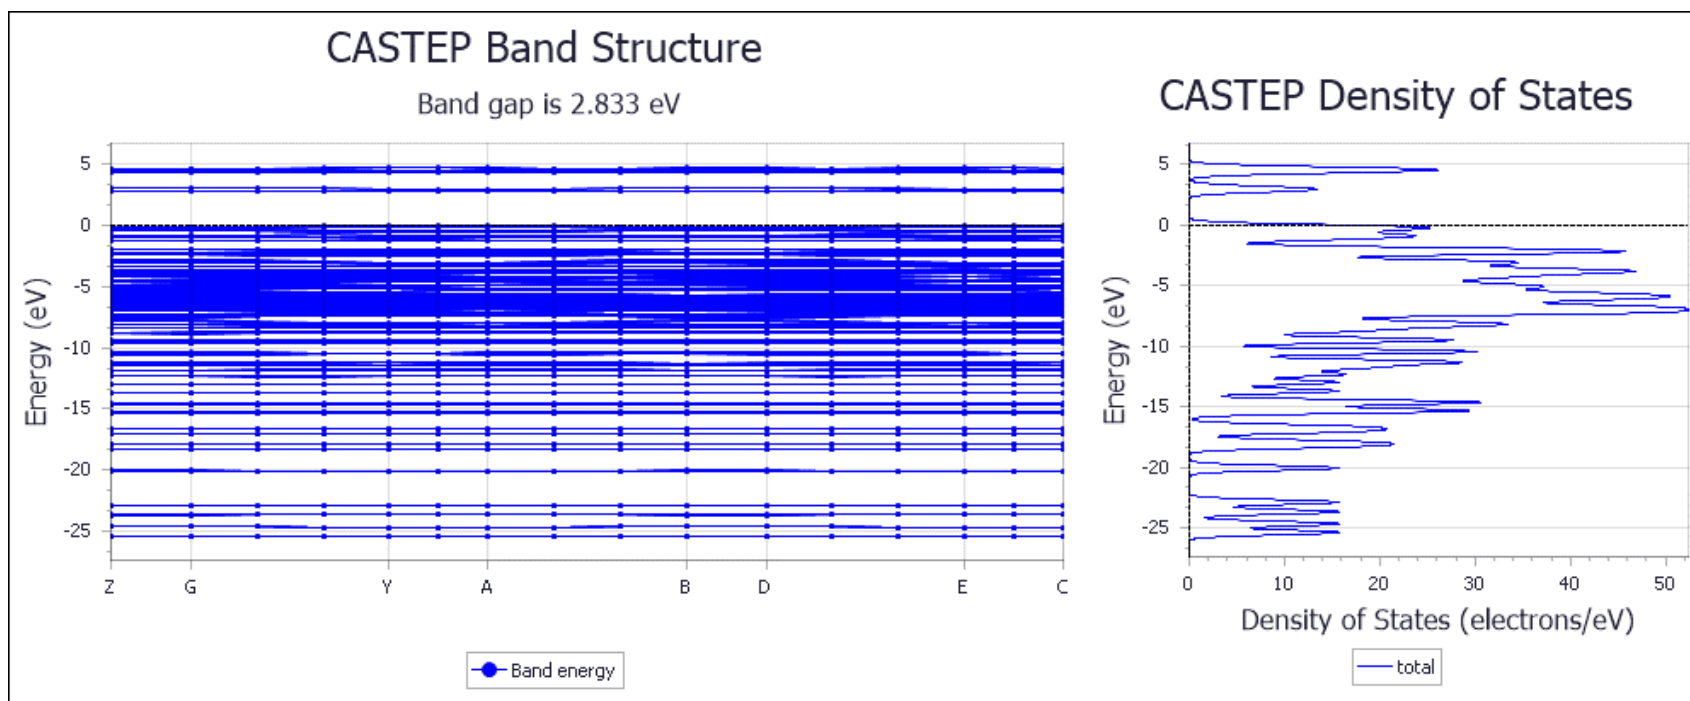

Unit cell of single crystal of **5c**, and band structure derived through plane-wave DFT, at the HSE06 level, with 850 eV cutoff

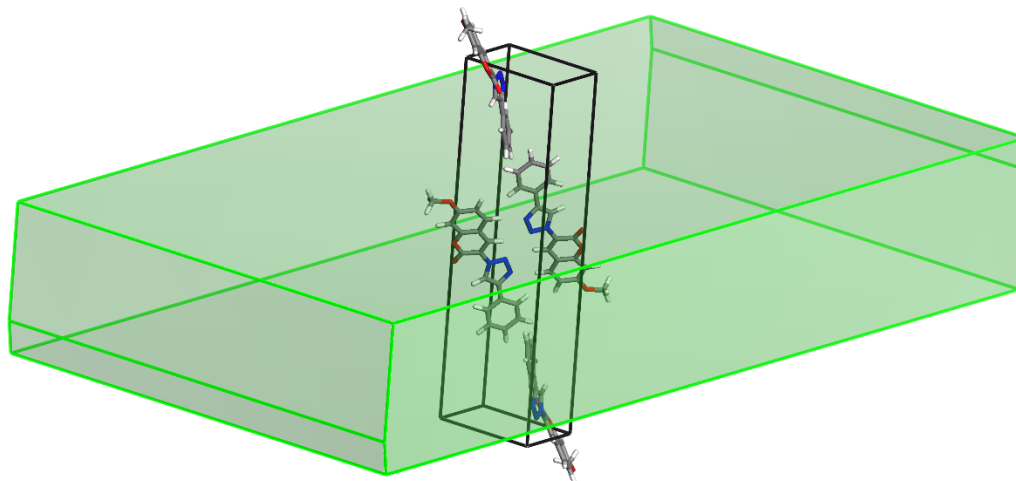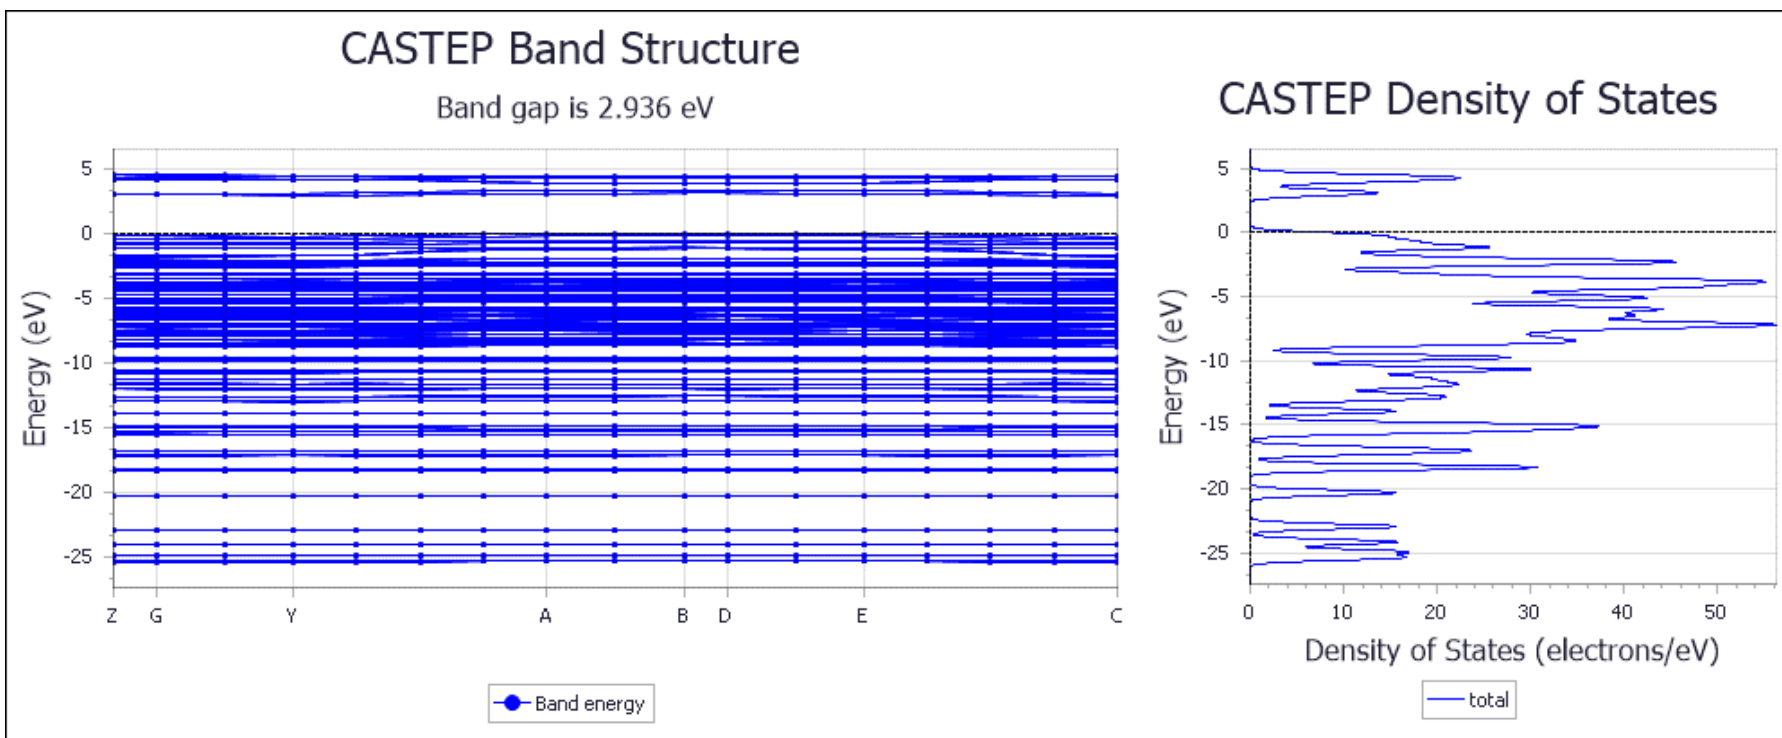

Unit cell of single crystal of **5f**, and band structure derived through plane-wave DFT, at the HSE06 level, with 850 eV cutoff



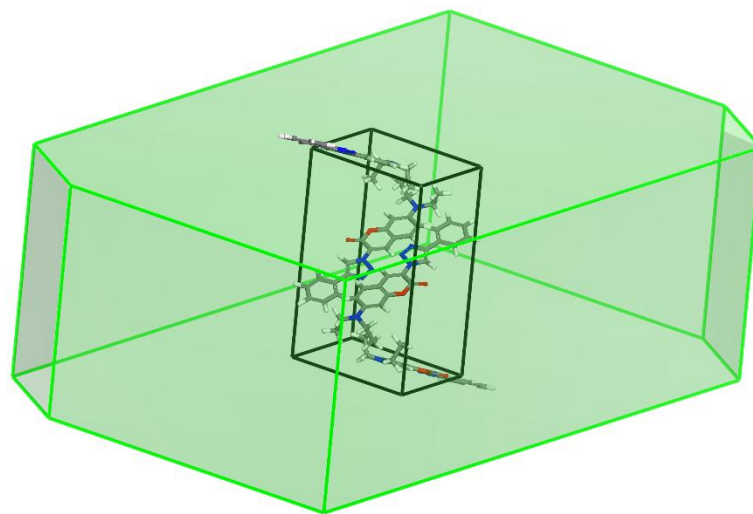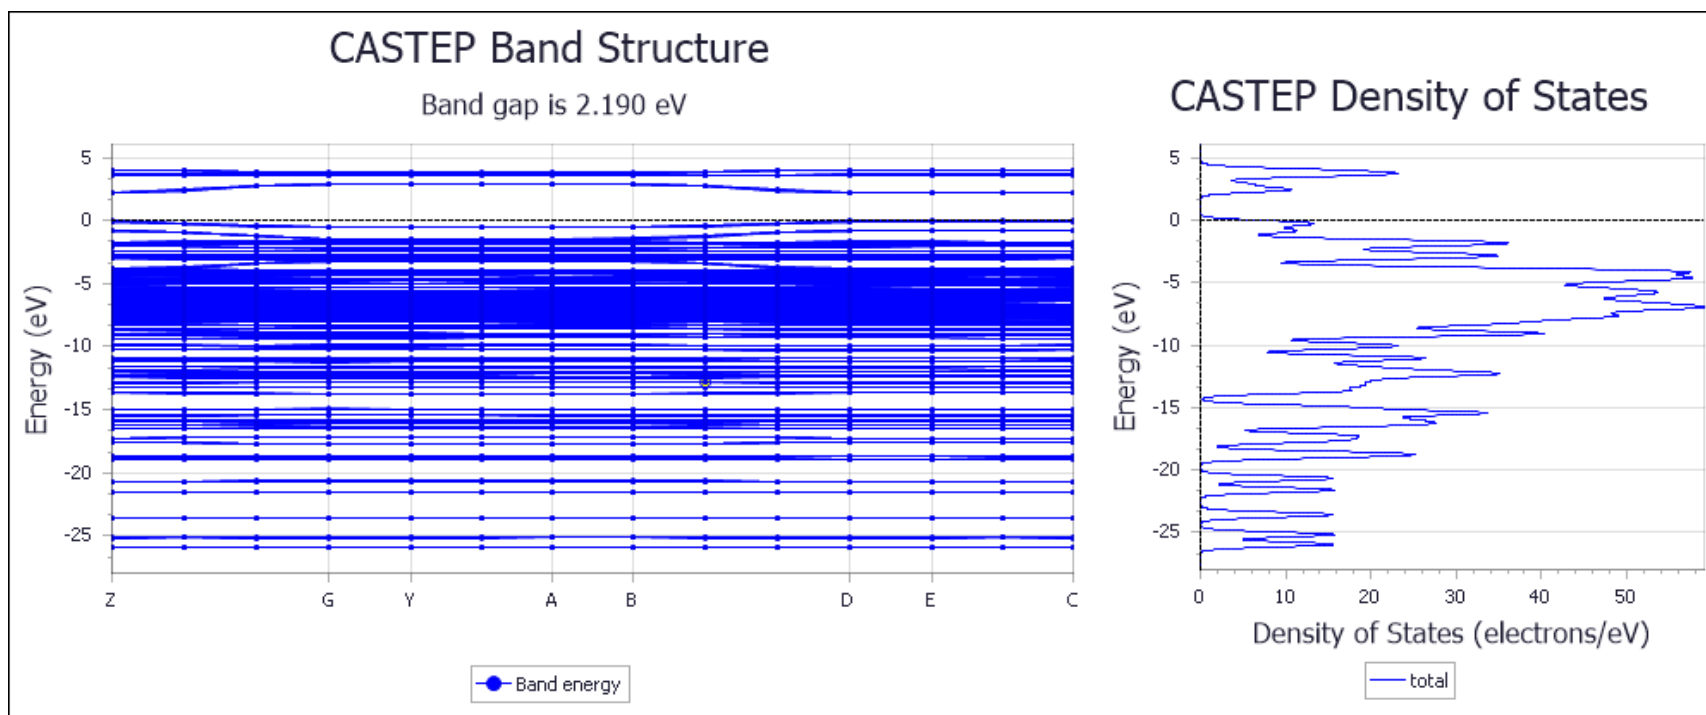

Unit cell of single crystal of **5h**, and band structure derived through plane-wave DFT, at the HSE06 level, with 850 eV cutoff

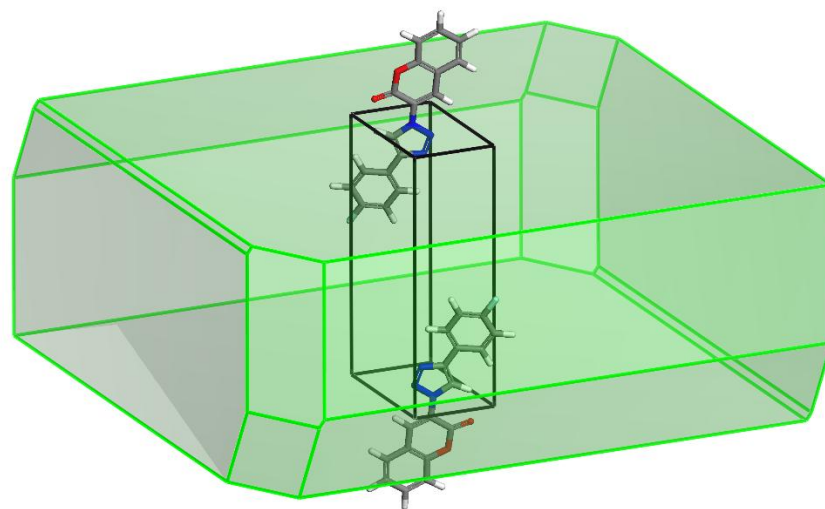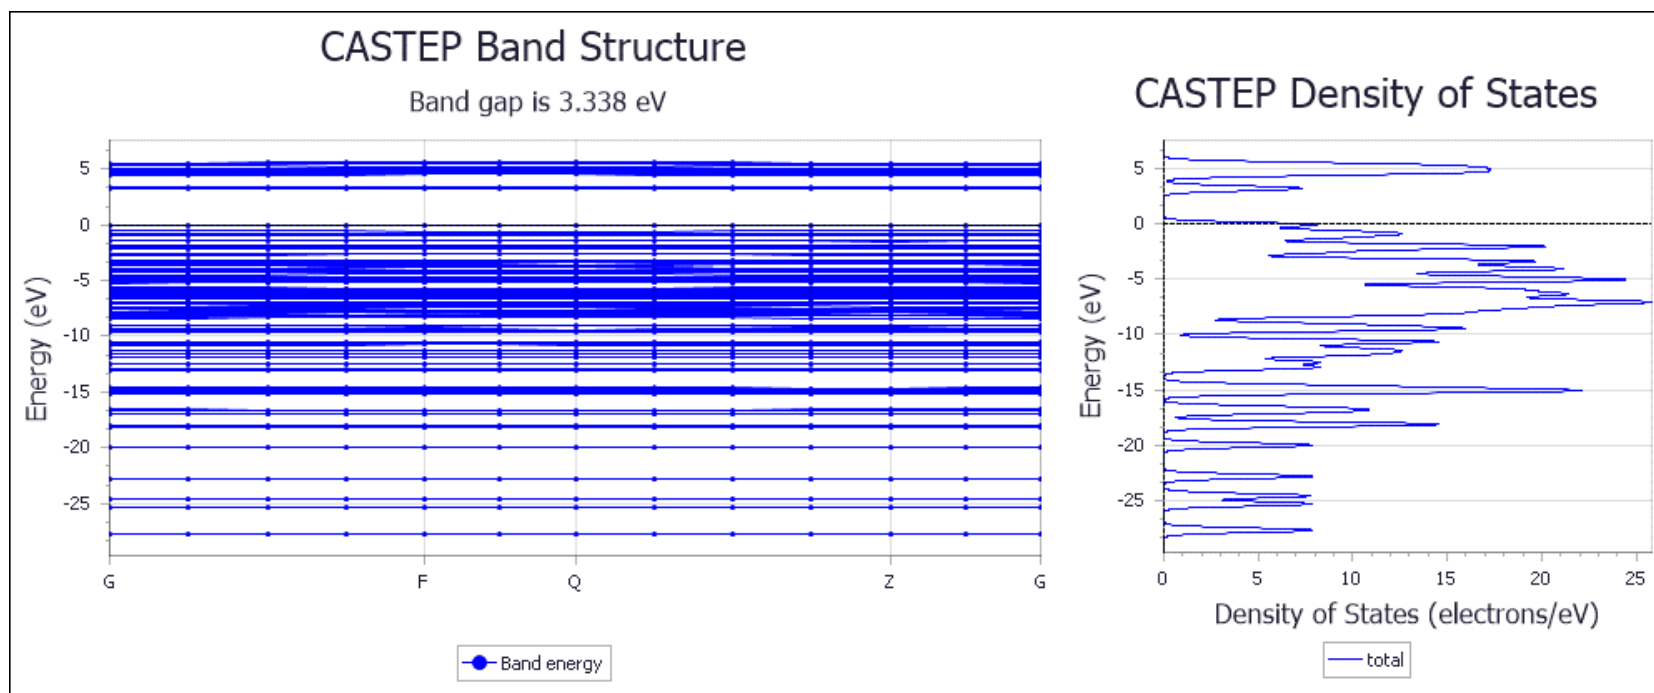

Unit cell of single crystal of **5j**, and band structure derived through plane-wave DFT, at the HSE06 level, with 850 eV cutoff

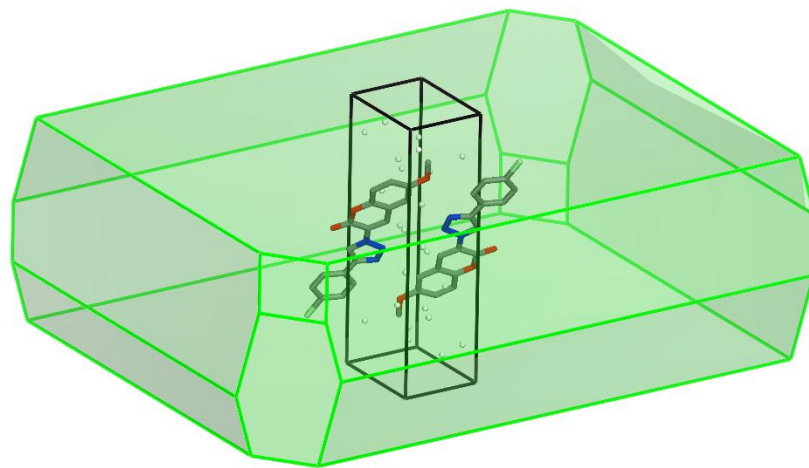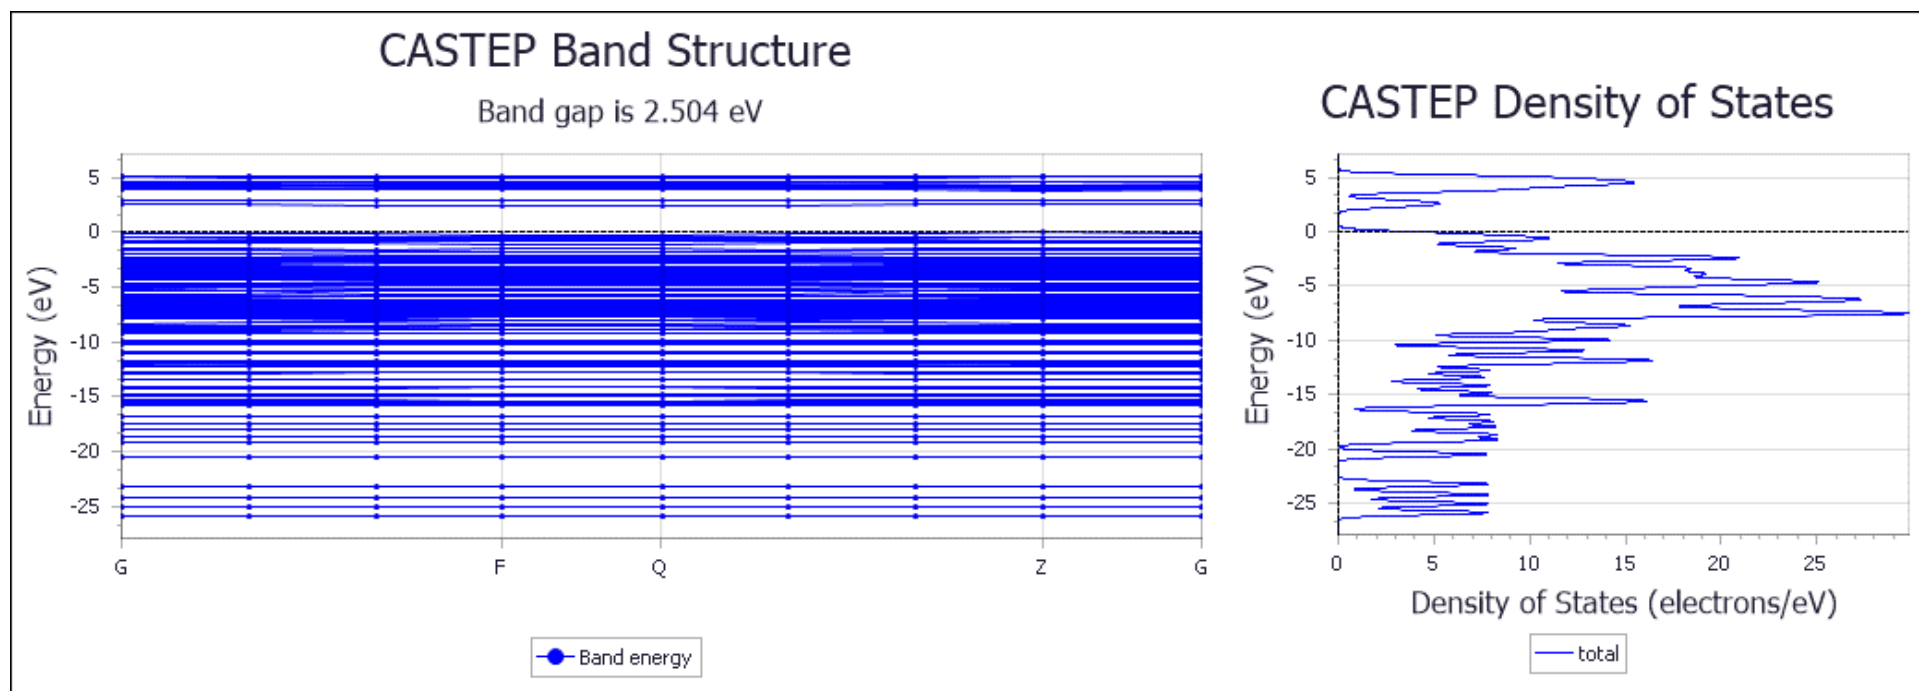

Unit cell of single crystal of **5k**, and band structure derived through plane-wave DFT, at the HSE06 level, with 850 eV cutoff

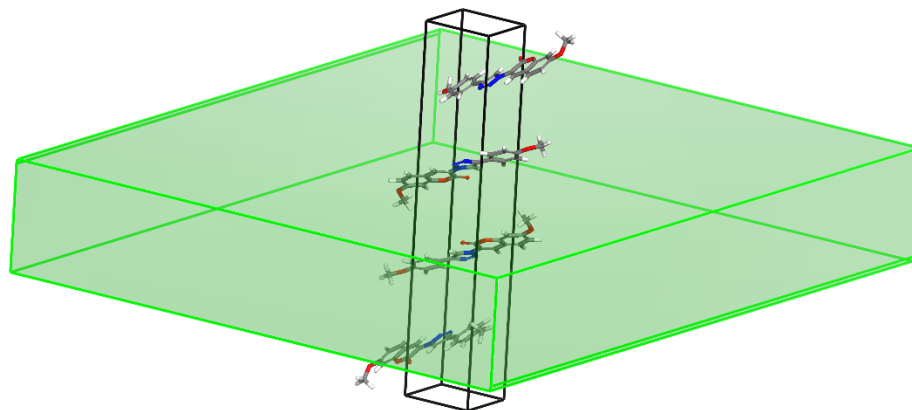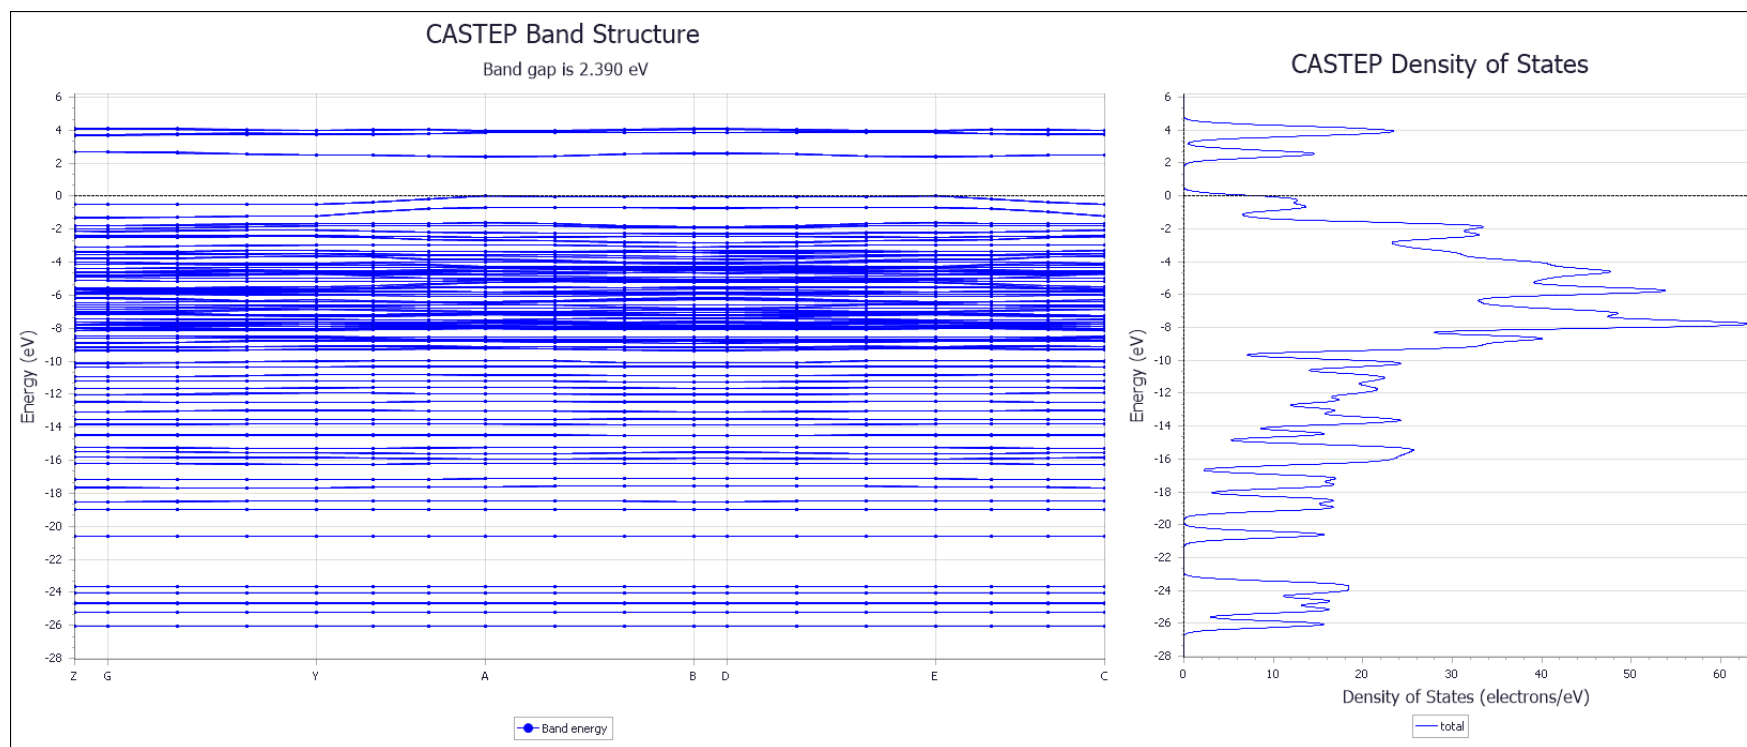

Unit cell of single crystal of **5I**, and band structure derived through plane-wave DFT, at the HSE06 level, with 850 eV cutoff

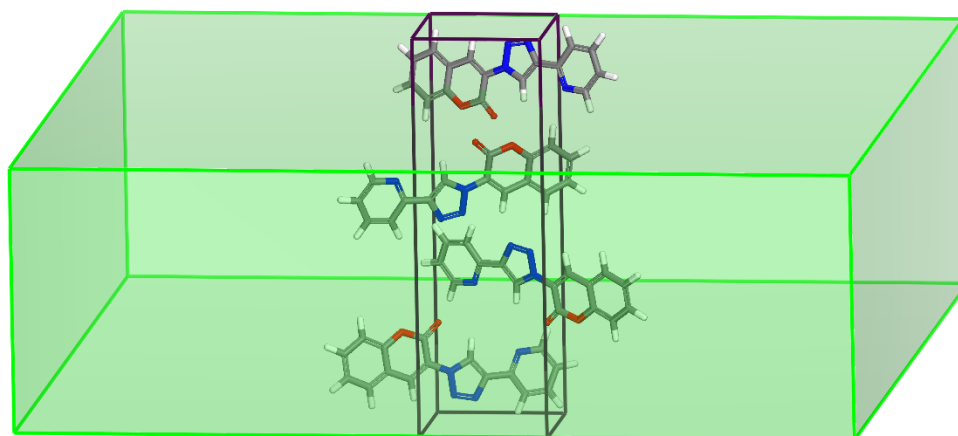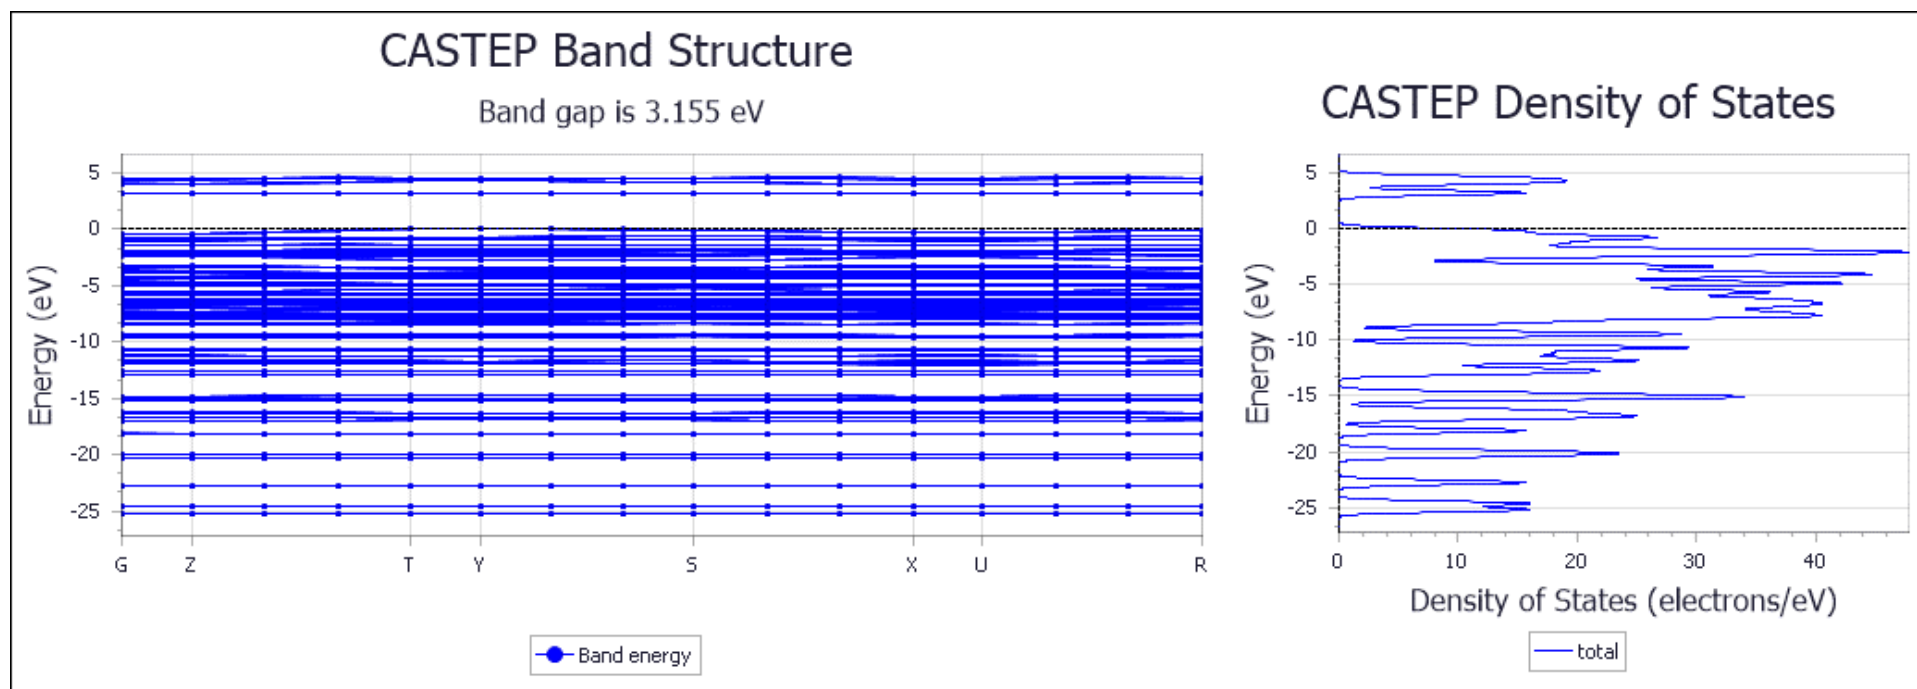

Unit cell of single crystal of **6a**, and band structure derived through plane-wave DFT, at the HSE06 level, with 850 eV cutoff

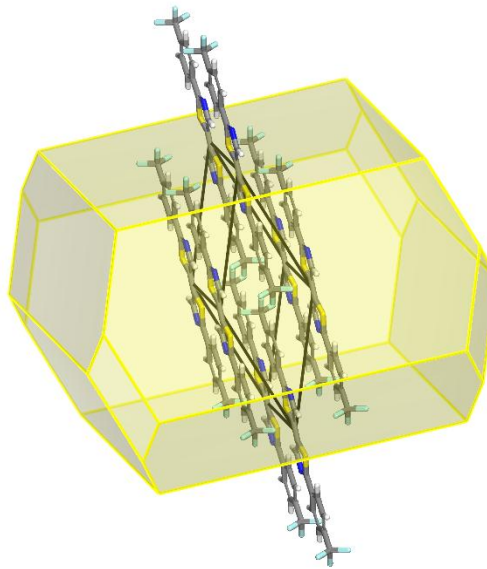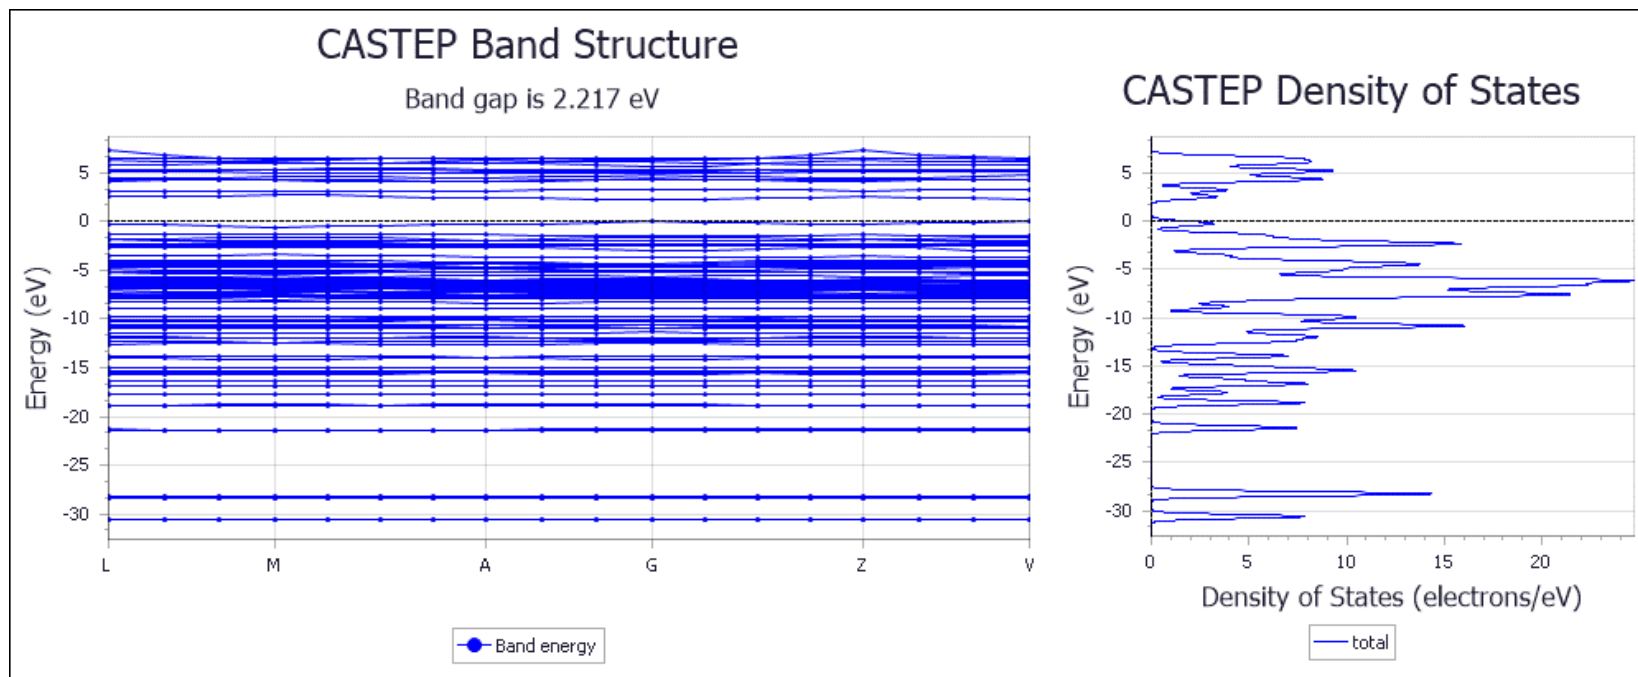

<sup>1</sup>H-NMR spectrum for compound 3-(4-phenyl-1H-1,2,3-triazol-1-yl)-2H-chromen-2-one (**5a**)

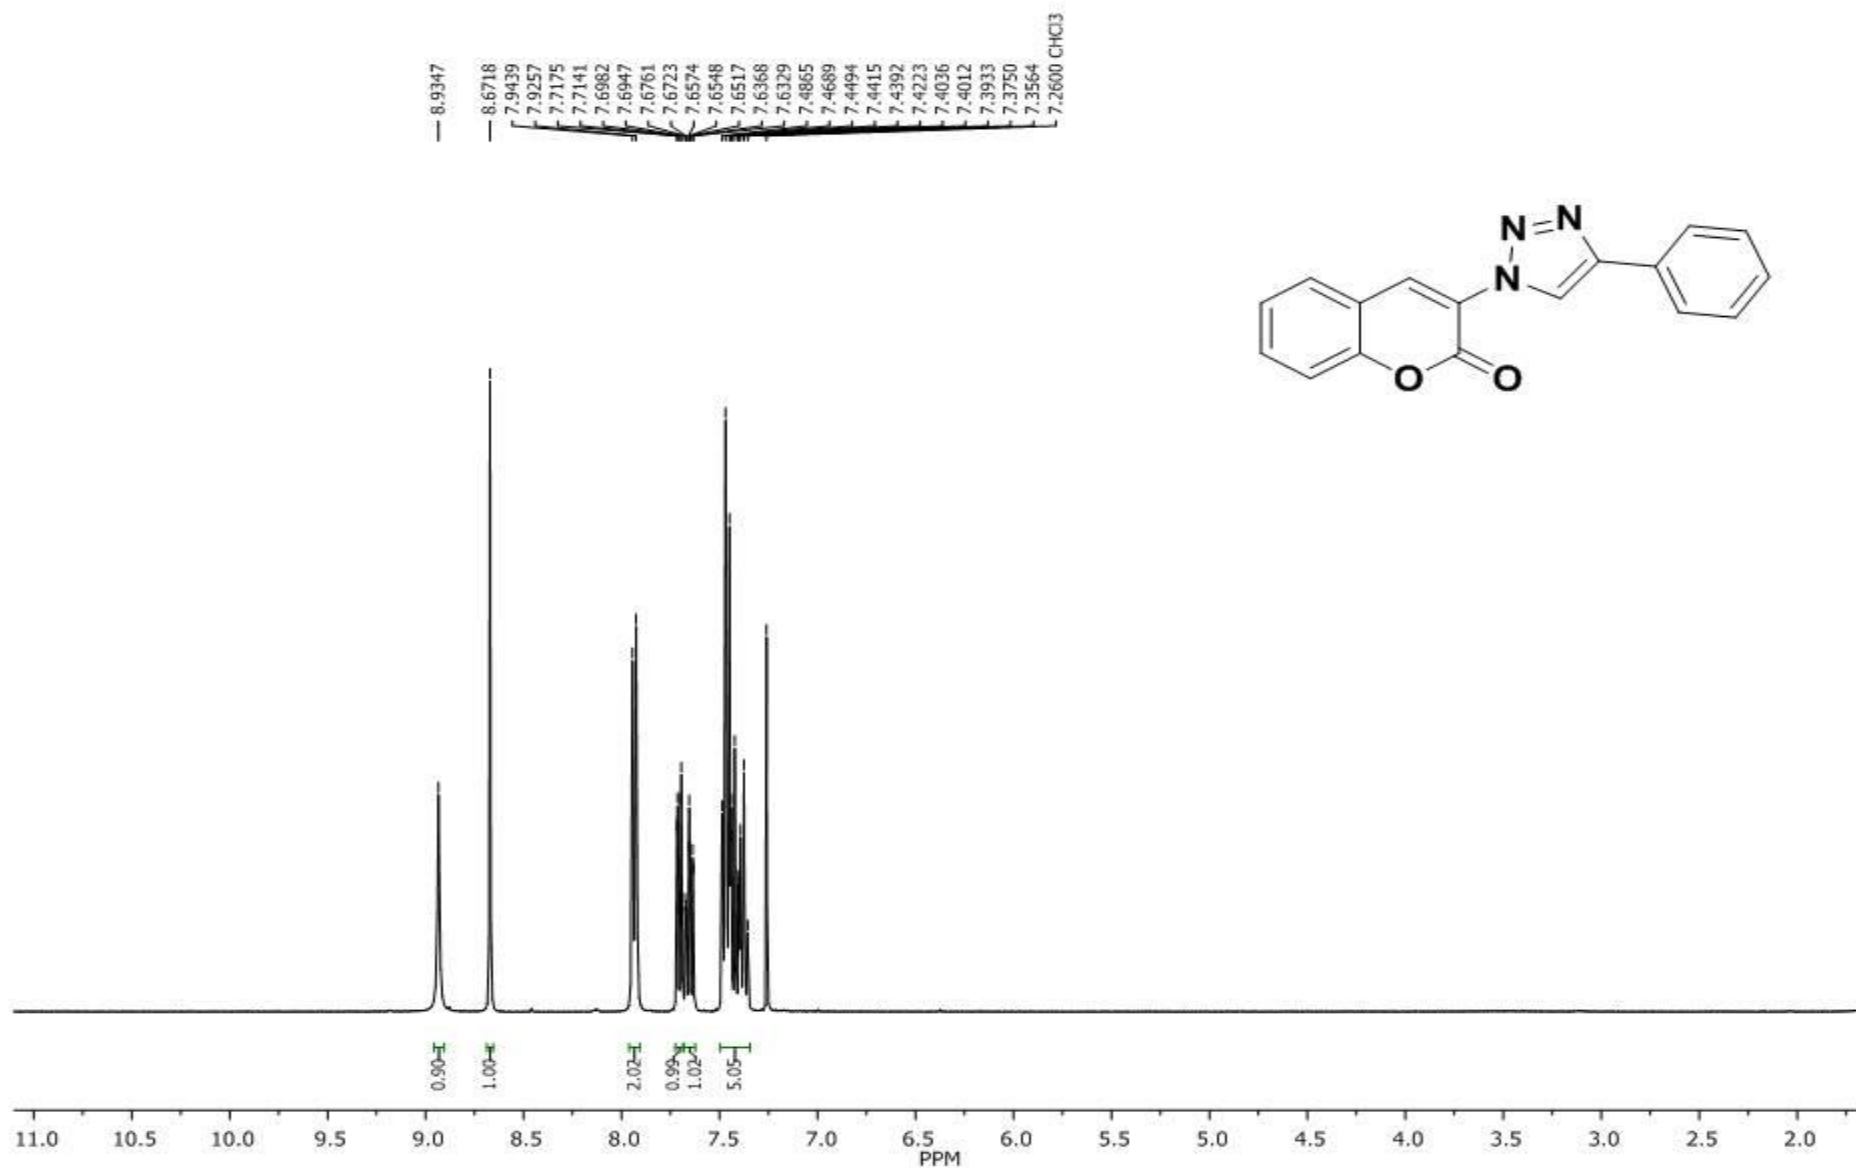

$^{13}\text{C}$ -NMR spectrum for compound 3-(4-phenyl-1*H*-1,2,3-triazol-1-yl)-2*H*-chromen-2-one (**5a**)

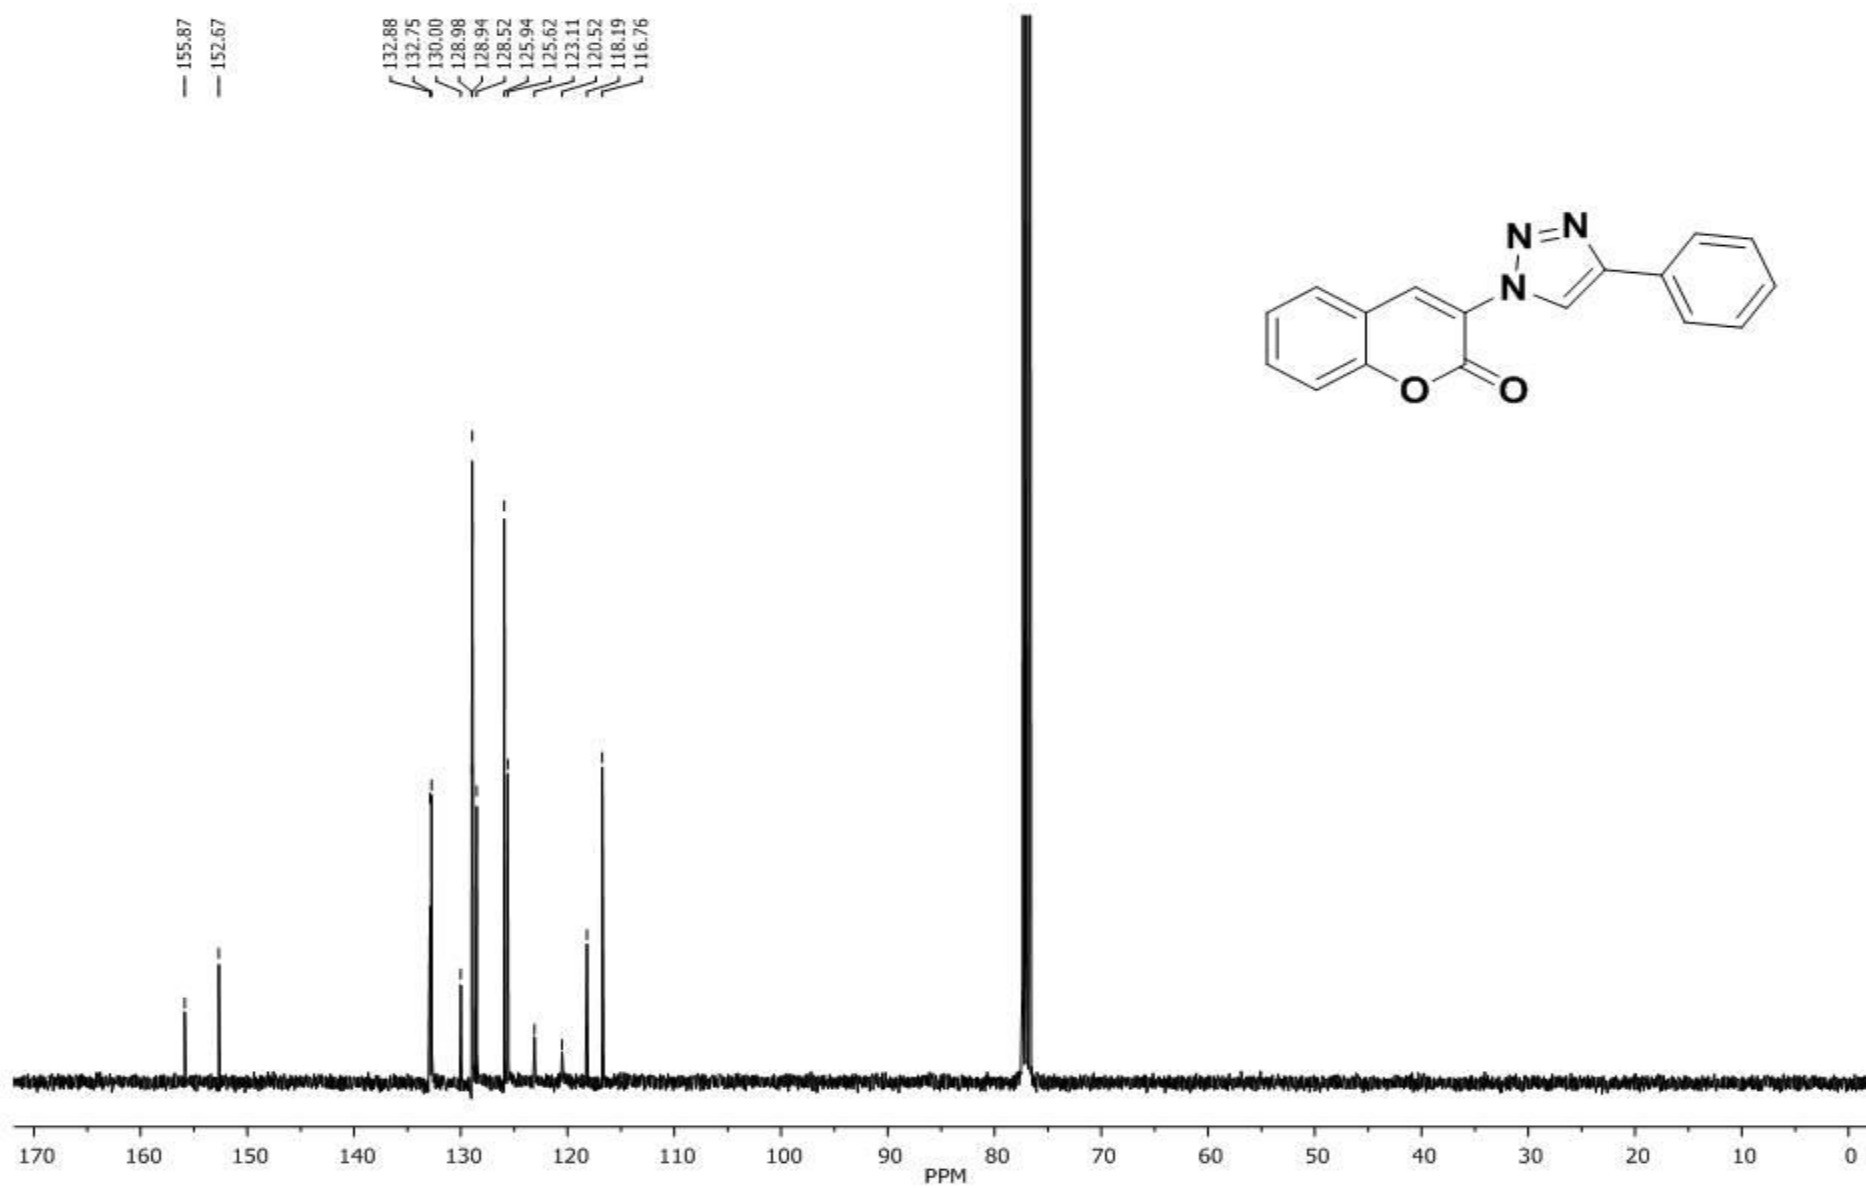



<sup>1</sup>H-NMR spectrum for compound 6-methoxy-3-(4-(pyridin-2-yl)-1H-1,2,3-triazol-1-yl)-2H-chromen-2-one (**5b**)

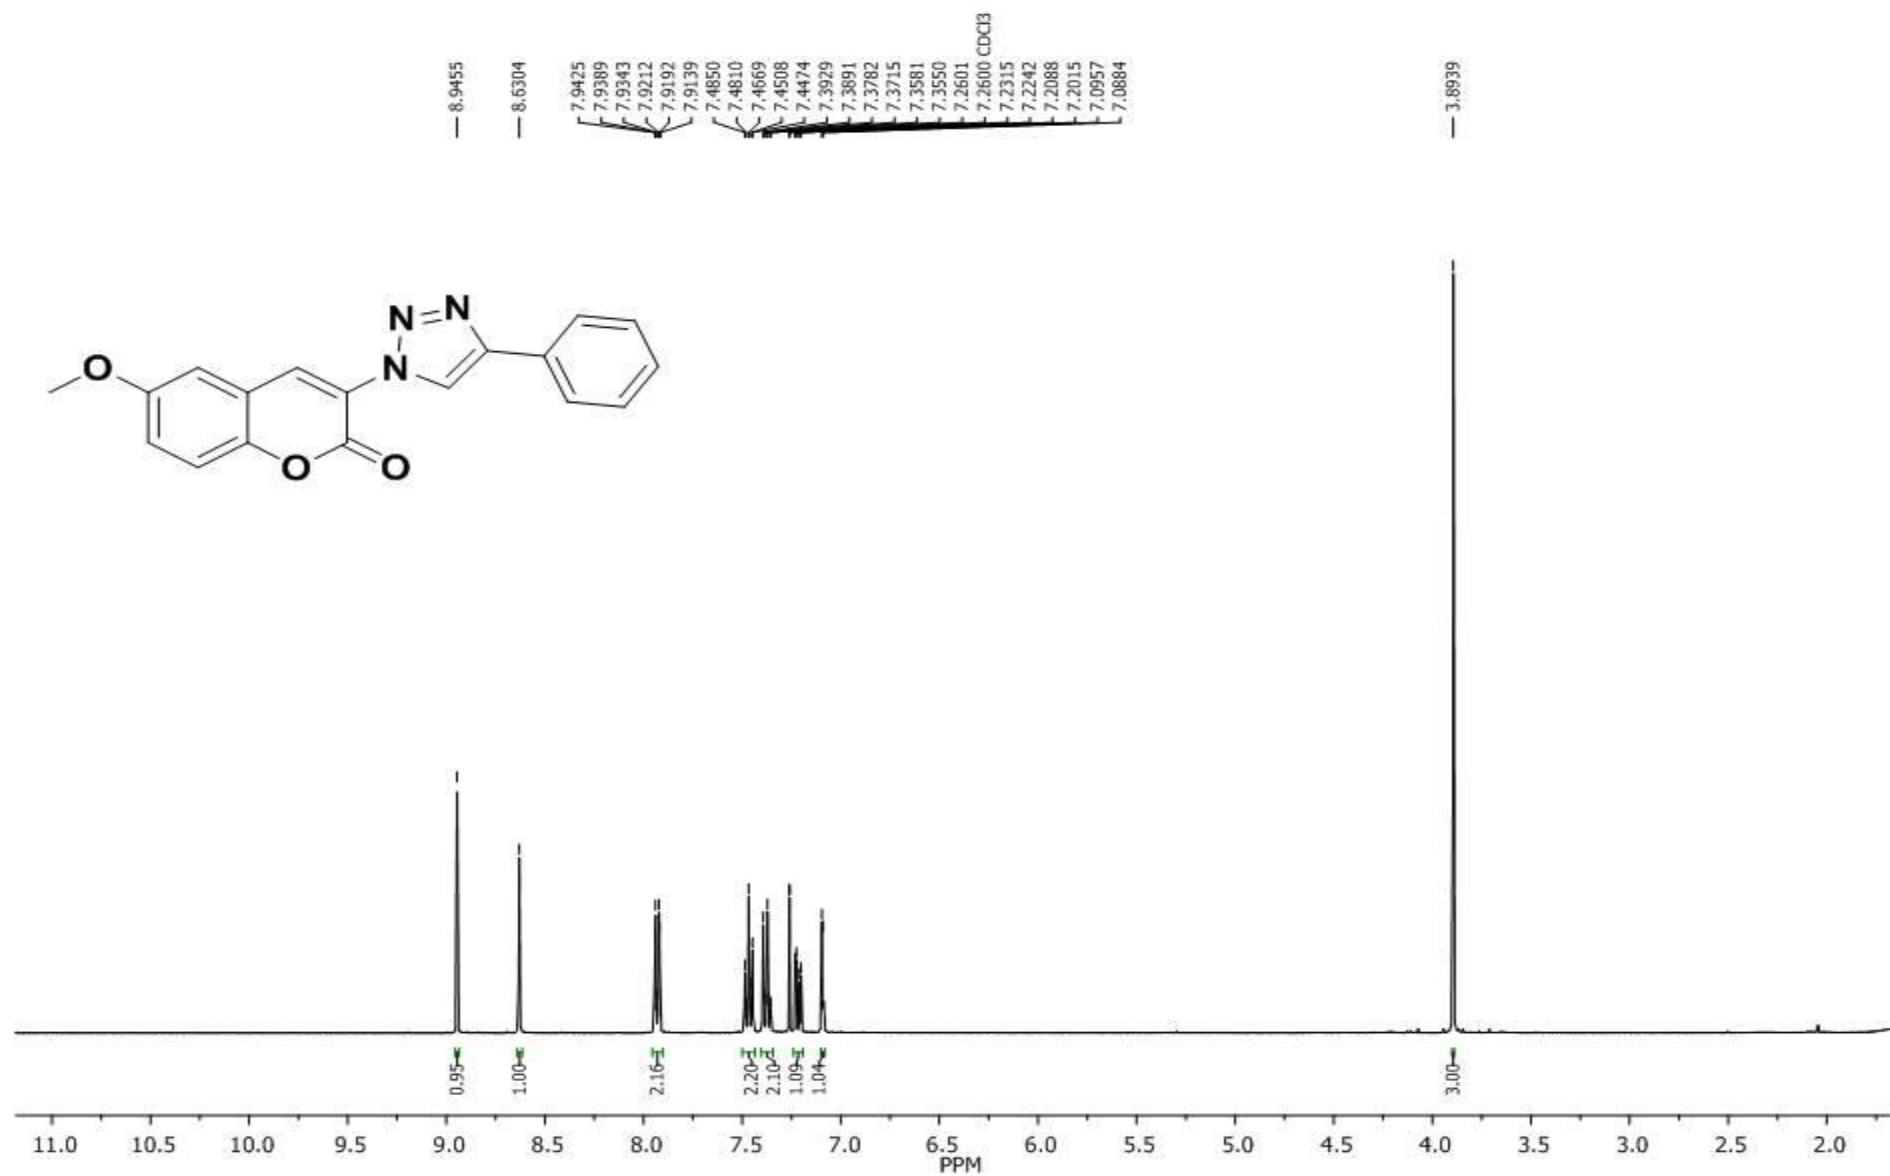

$^{13}\text{C}$ -NMR spectrum for compound 6-methoxy-3-(4-(pyridin-2-yl)-1*H*-1,2,3-triazol-1-yl)-2*H*-chromen-2-one (**5b**)

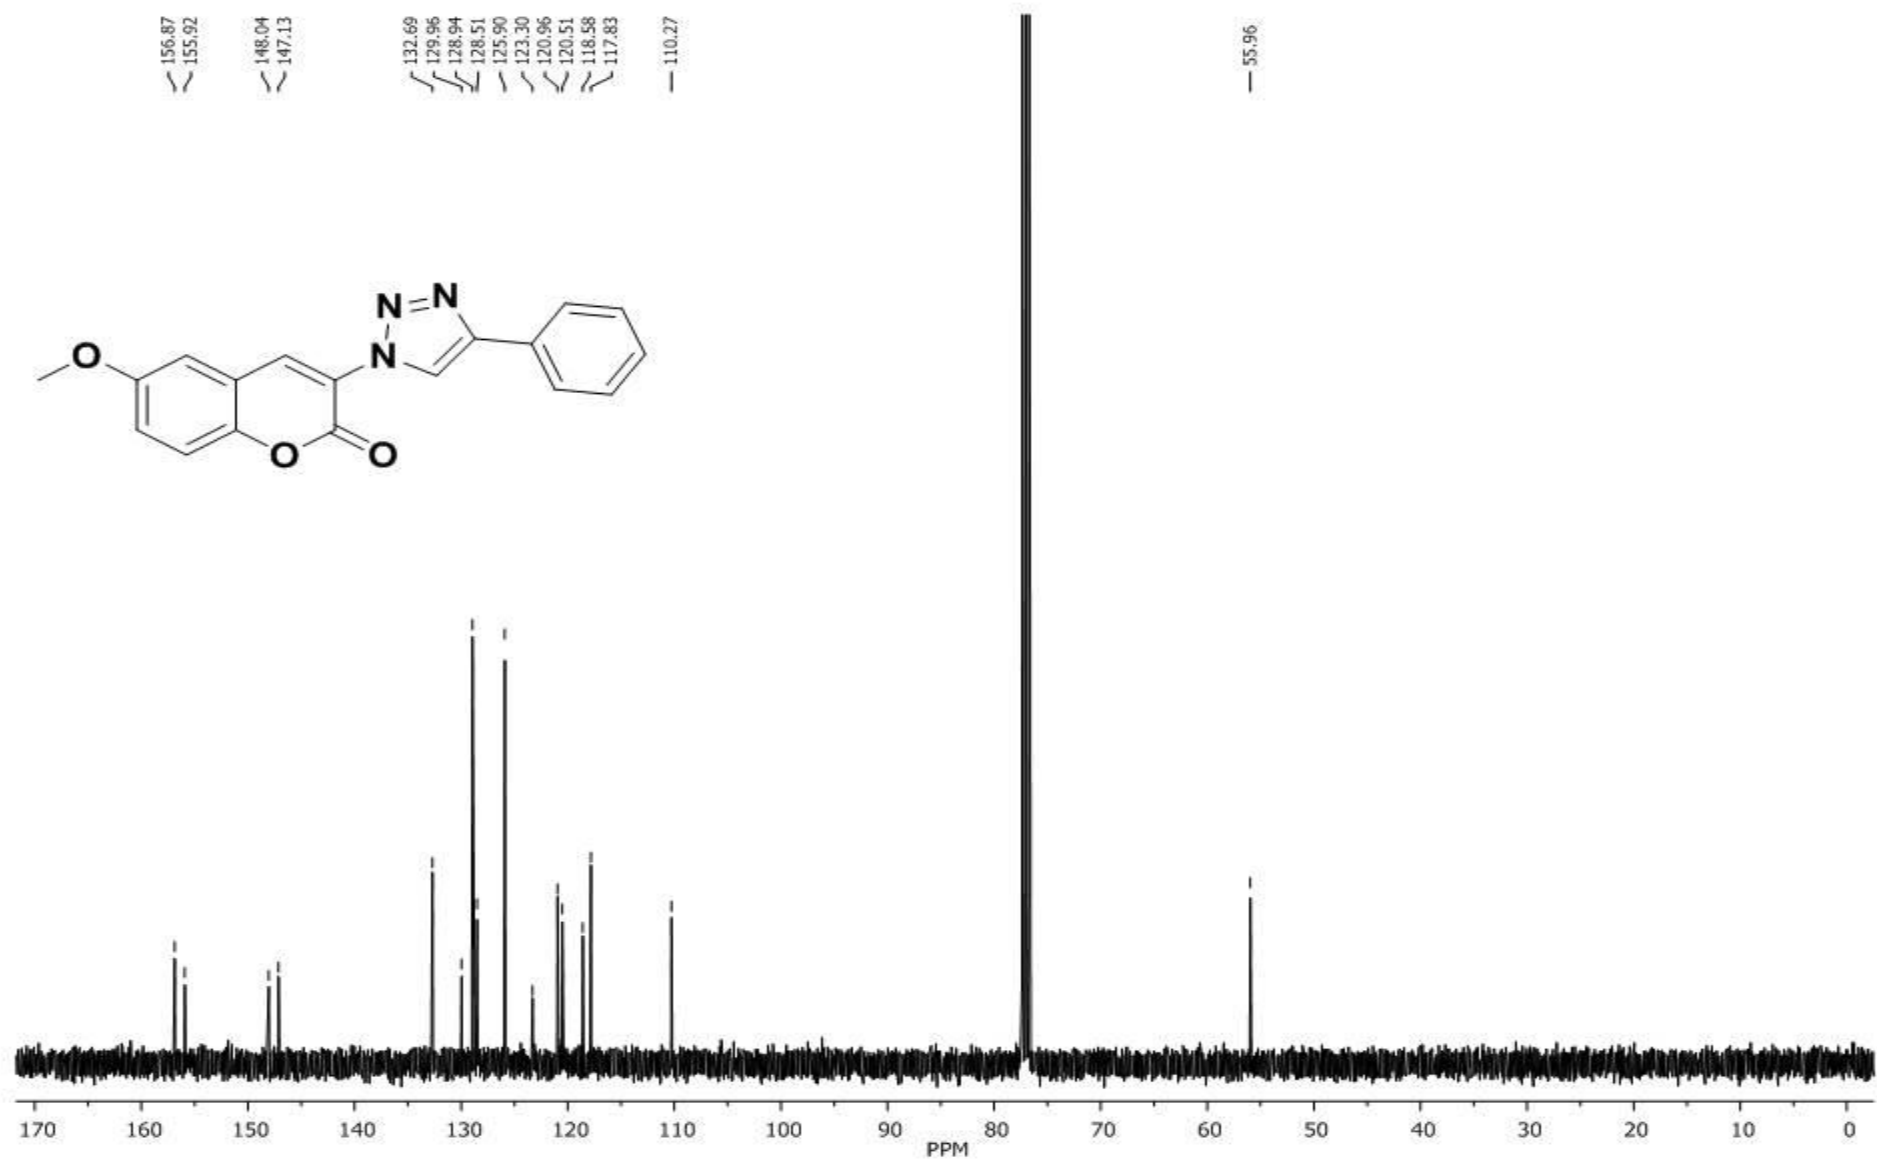

$^1\text{H-NMR}$  spectrum for compound 7-methoxy-3-(4-(pyridin-2-yl)-1*H*-1,2,3-triazol-1-yl)-2*H*-chromen-2-one (**5c**)

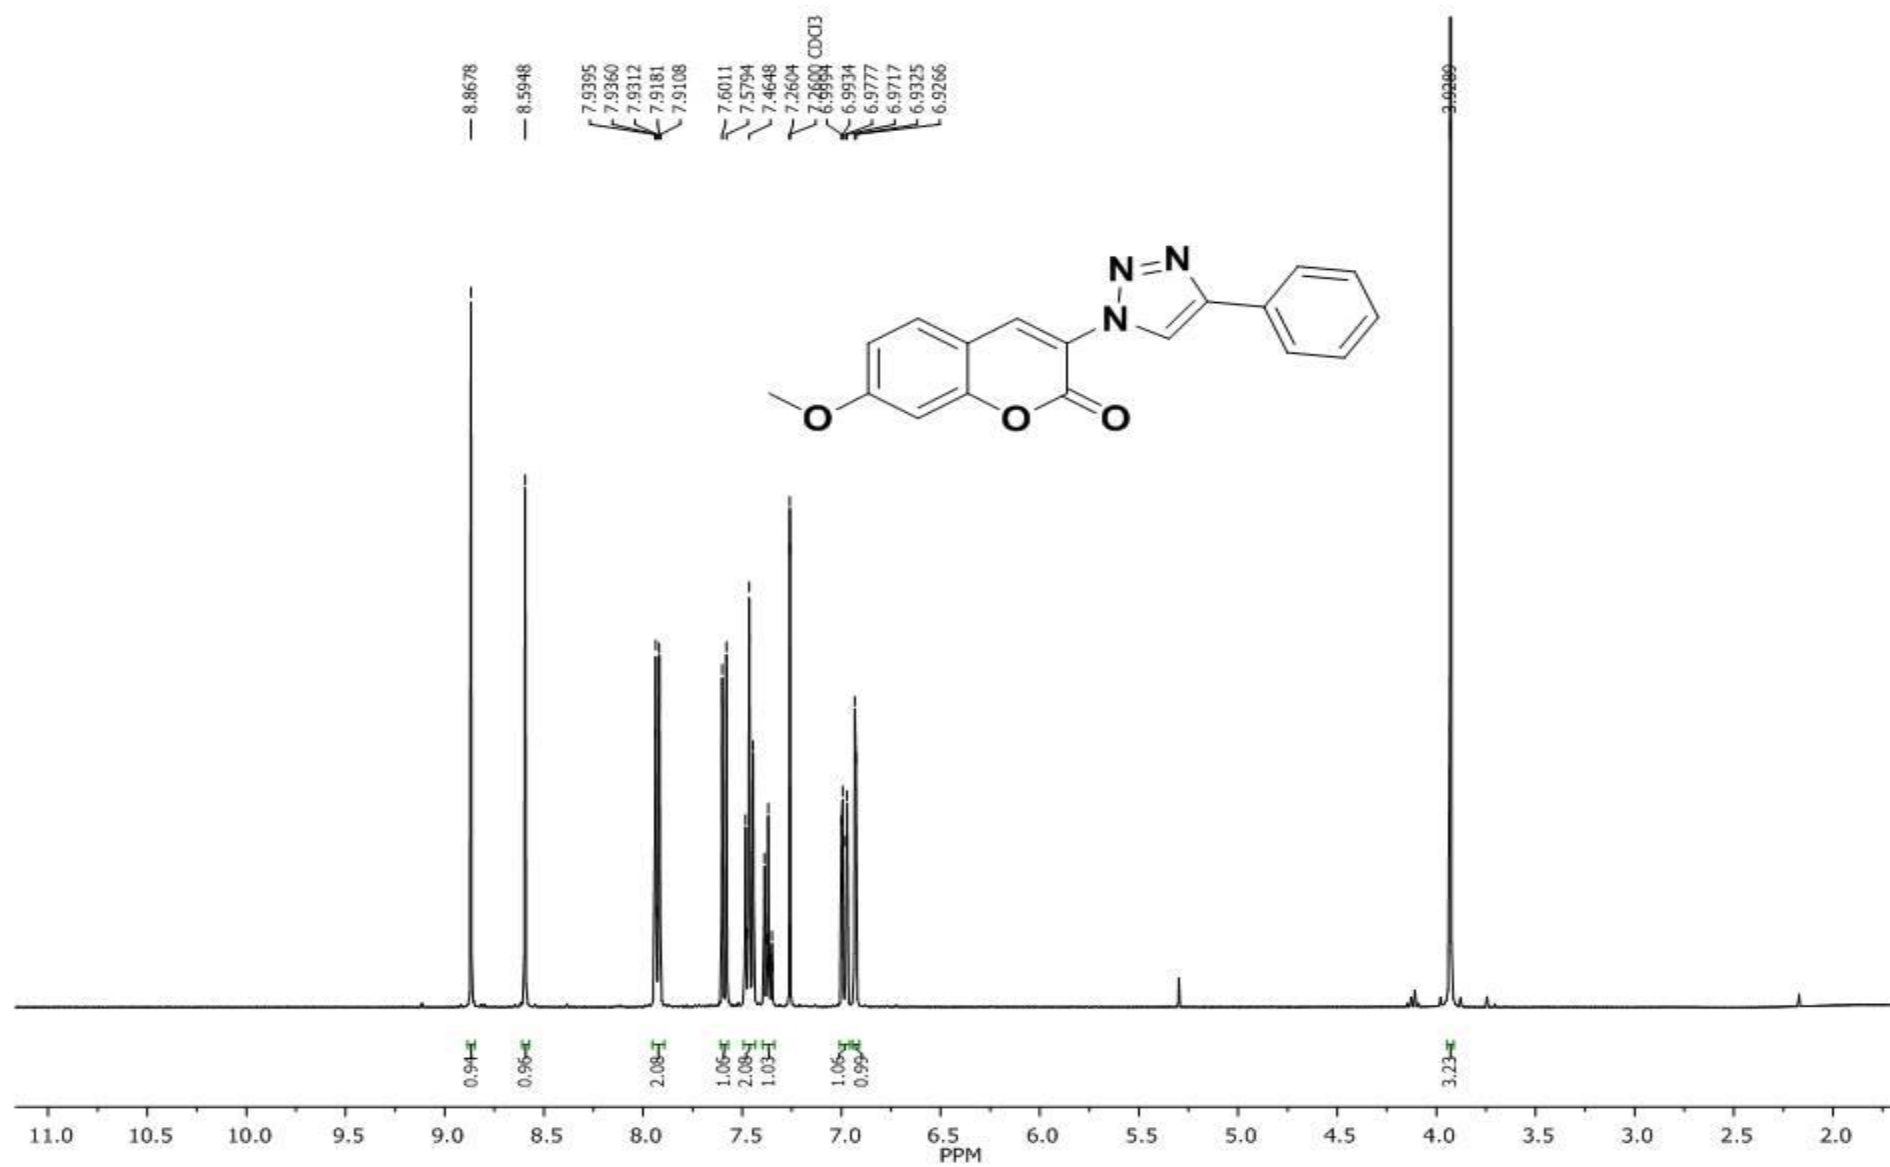

$^{13}\text{C}$ -NMR spectrum for compound 7-methoxy-3-(4-(pyridin-2-yl)-1*H*-1,2,3-triazol-1-yl)-2*H*-chromen-2-one (**5c**)

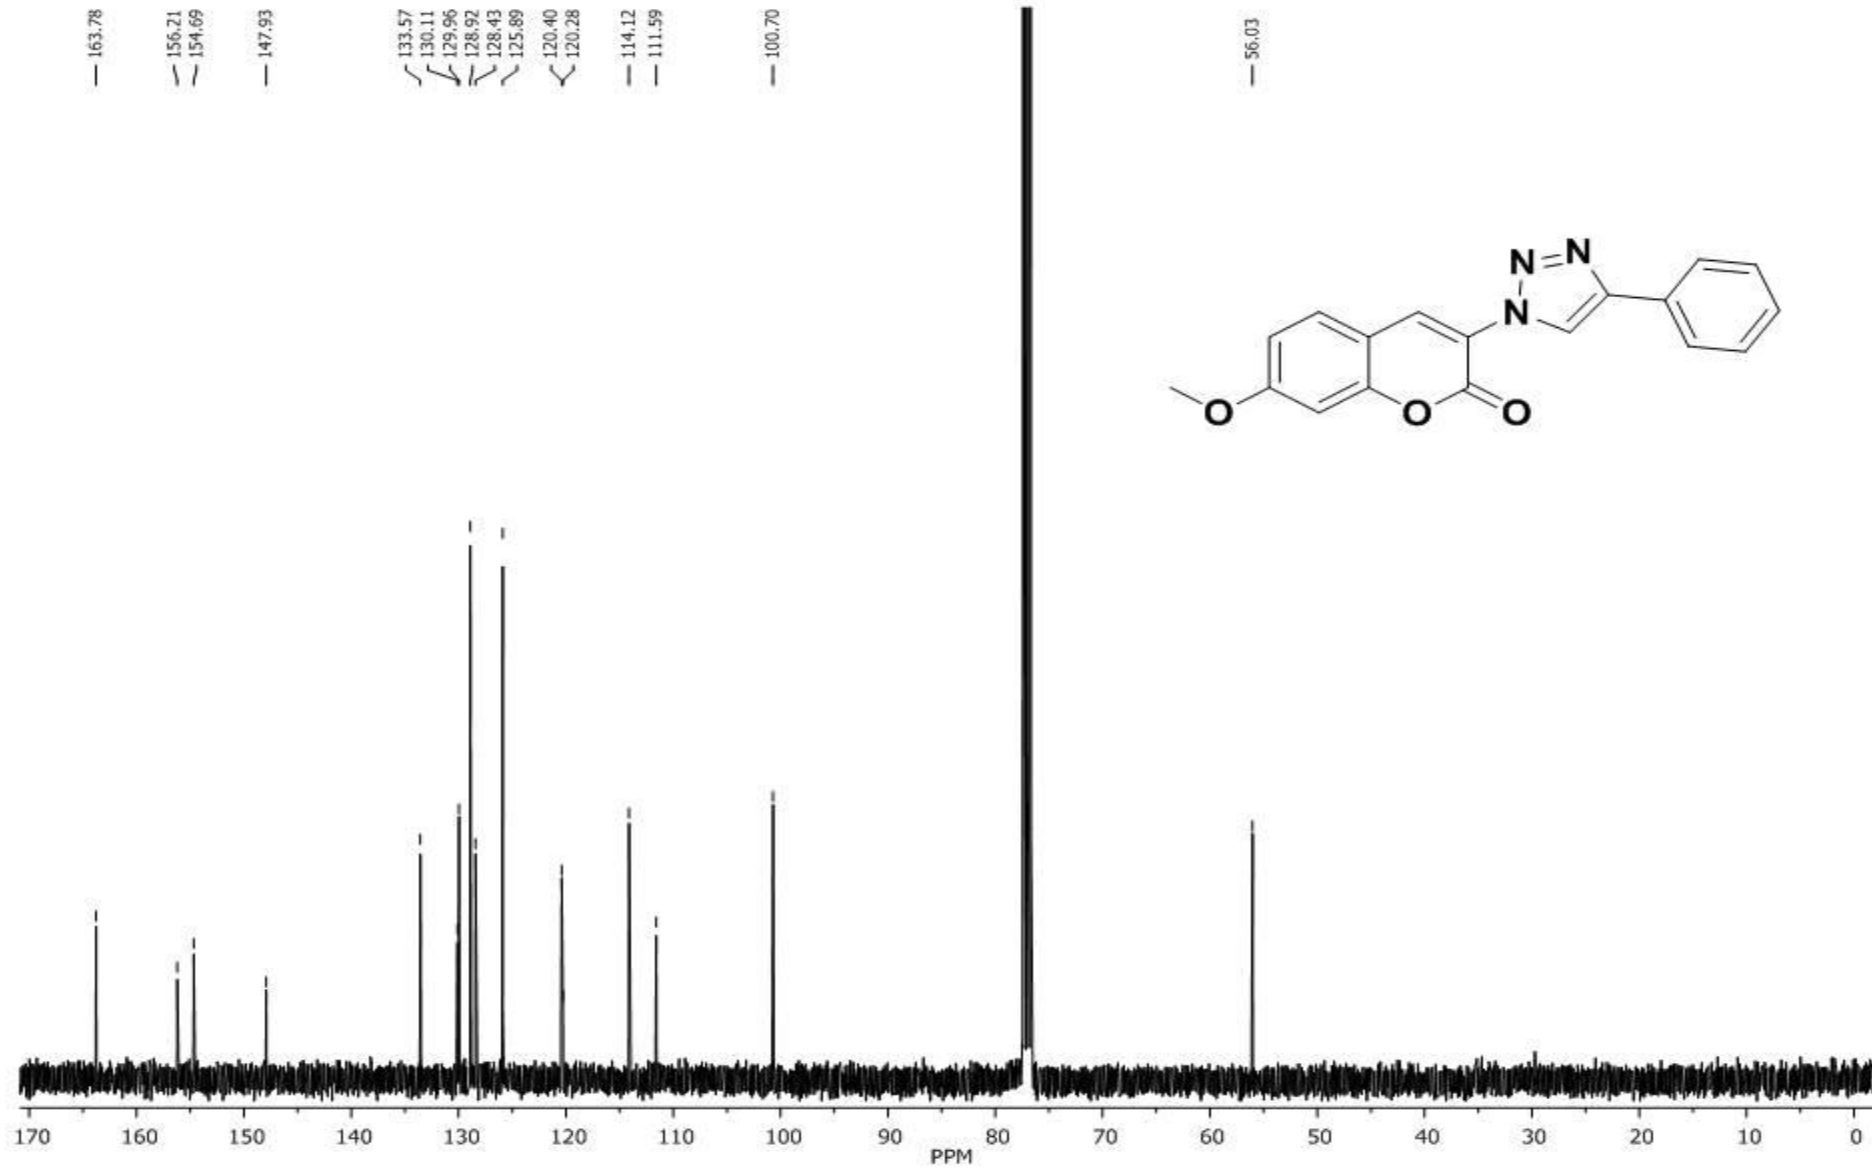

<sup>1</sup>H-NMR spectrum for compound 3-(4-(4-methoxyphenyl)-1H-1,2,3-triazol-1-yl)-2H-chromen-2-one (**5d**)

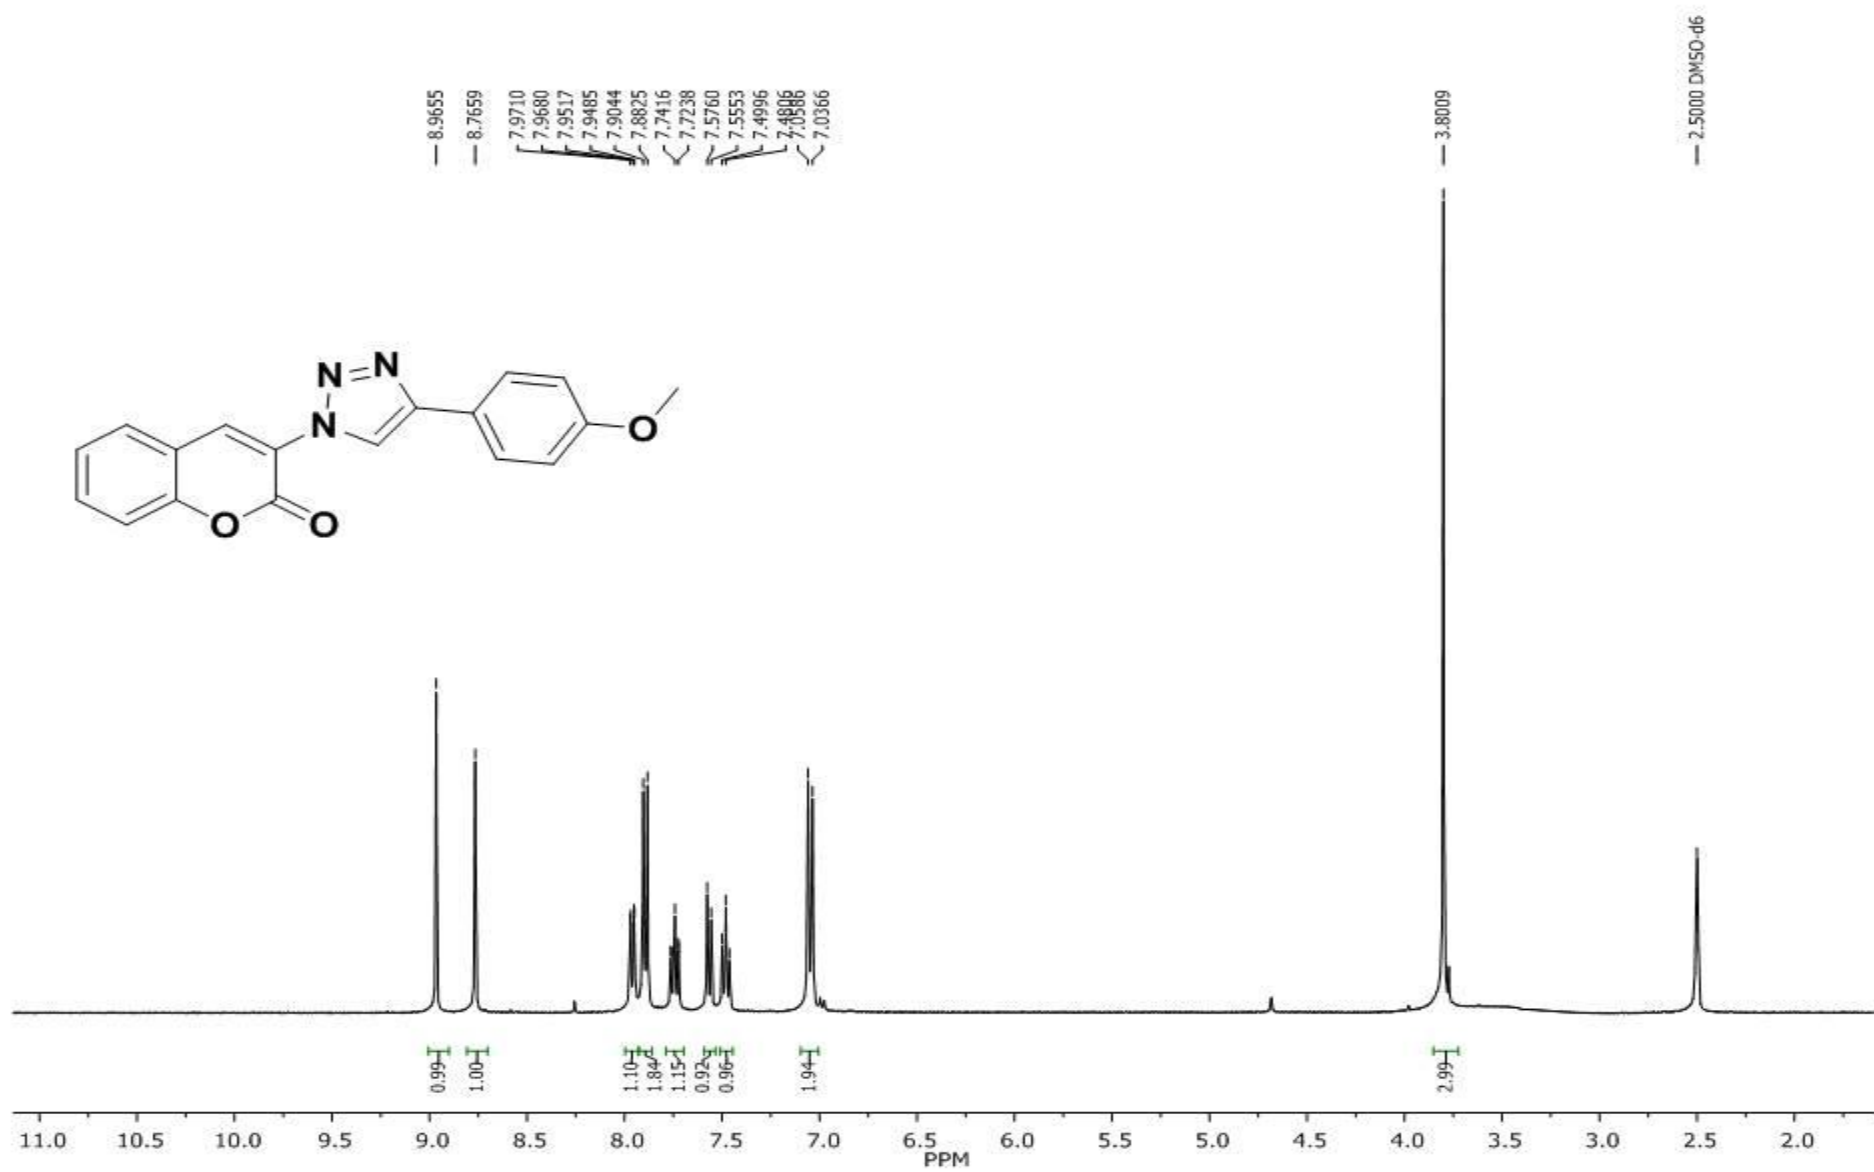

$^{13}\text{C}$ -NMR spectrum for compound 3-(4-(4-methoxyphenyl)-1*H*-1,2,3-triazol-1-yl)-2*H*-chromen-2-one (**5d**)

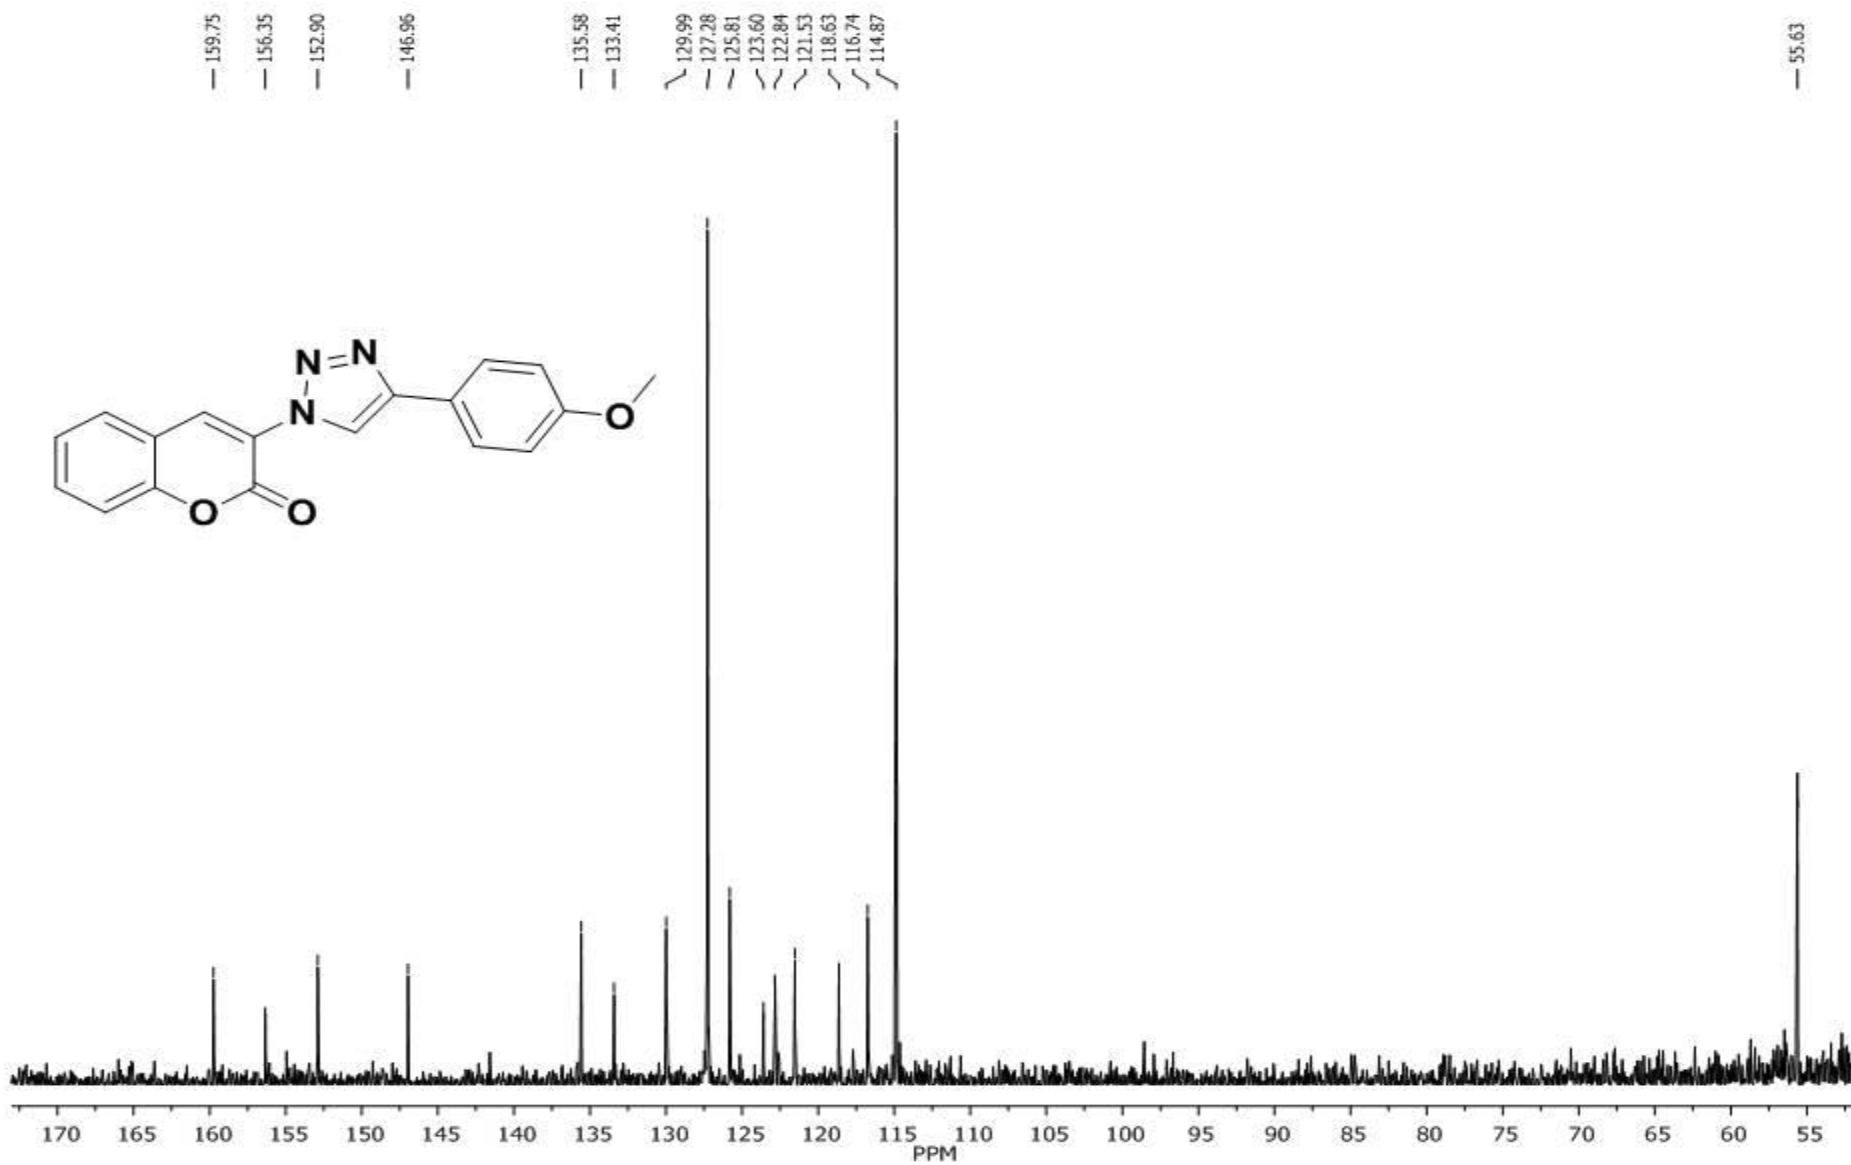

<sup>1</sup>H-NMR spectrum for compound 6-chloro-3-(4-phenyl-1*H*-1,2,3-triazol-1-yl)-2*H*-chromen-2-one (**5e**)

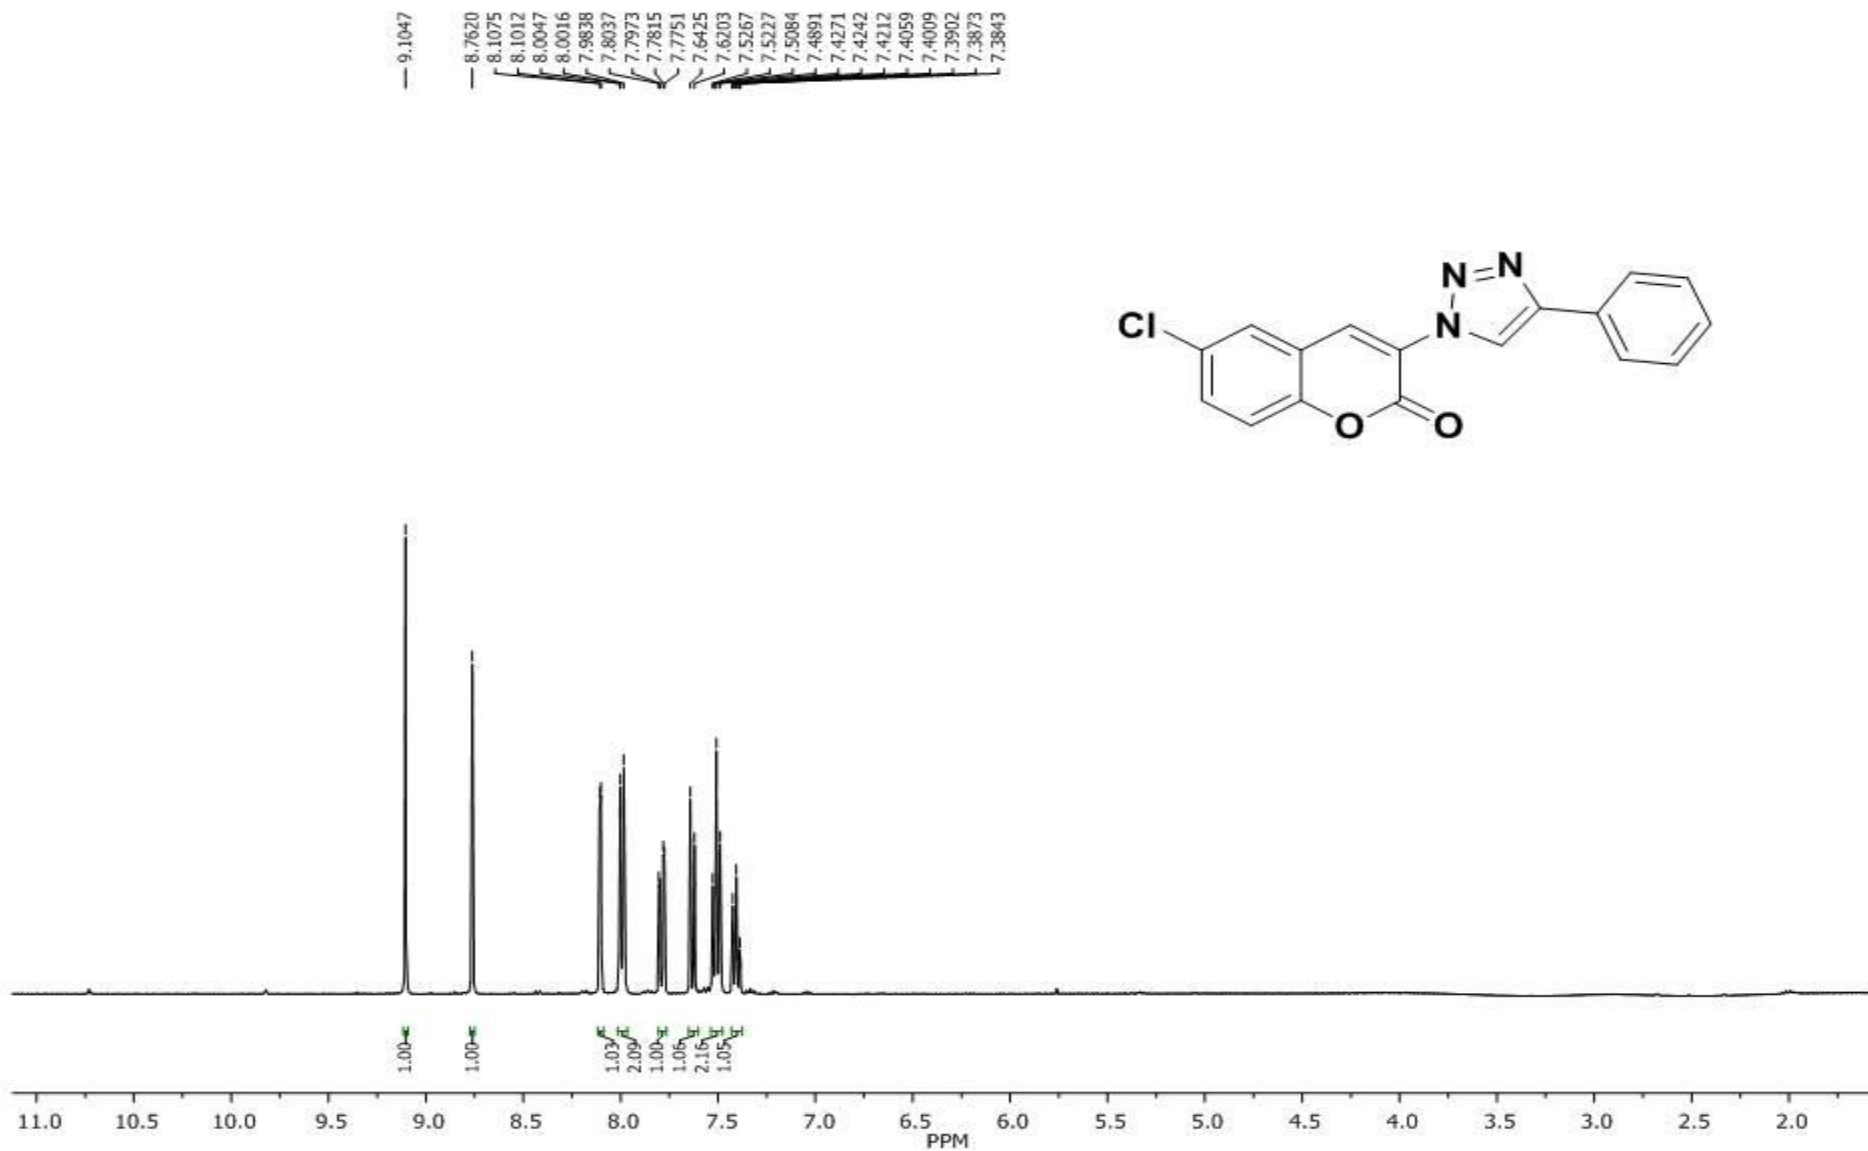

$^{13}\text{C}$ -NMR spectrum for compound 6-chloro-3-(4-phenyl-1*H*-1,2,3-triazol-1-yl)-2*H*-chromen-2-one (**5e**)

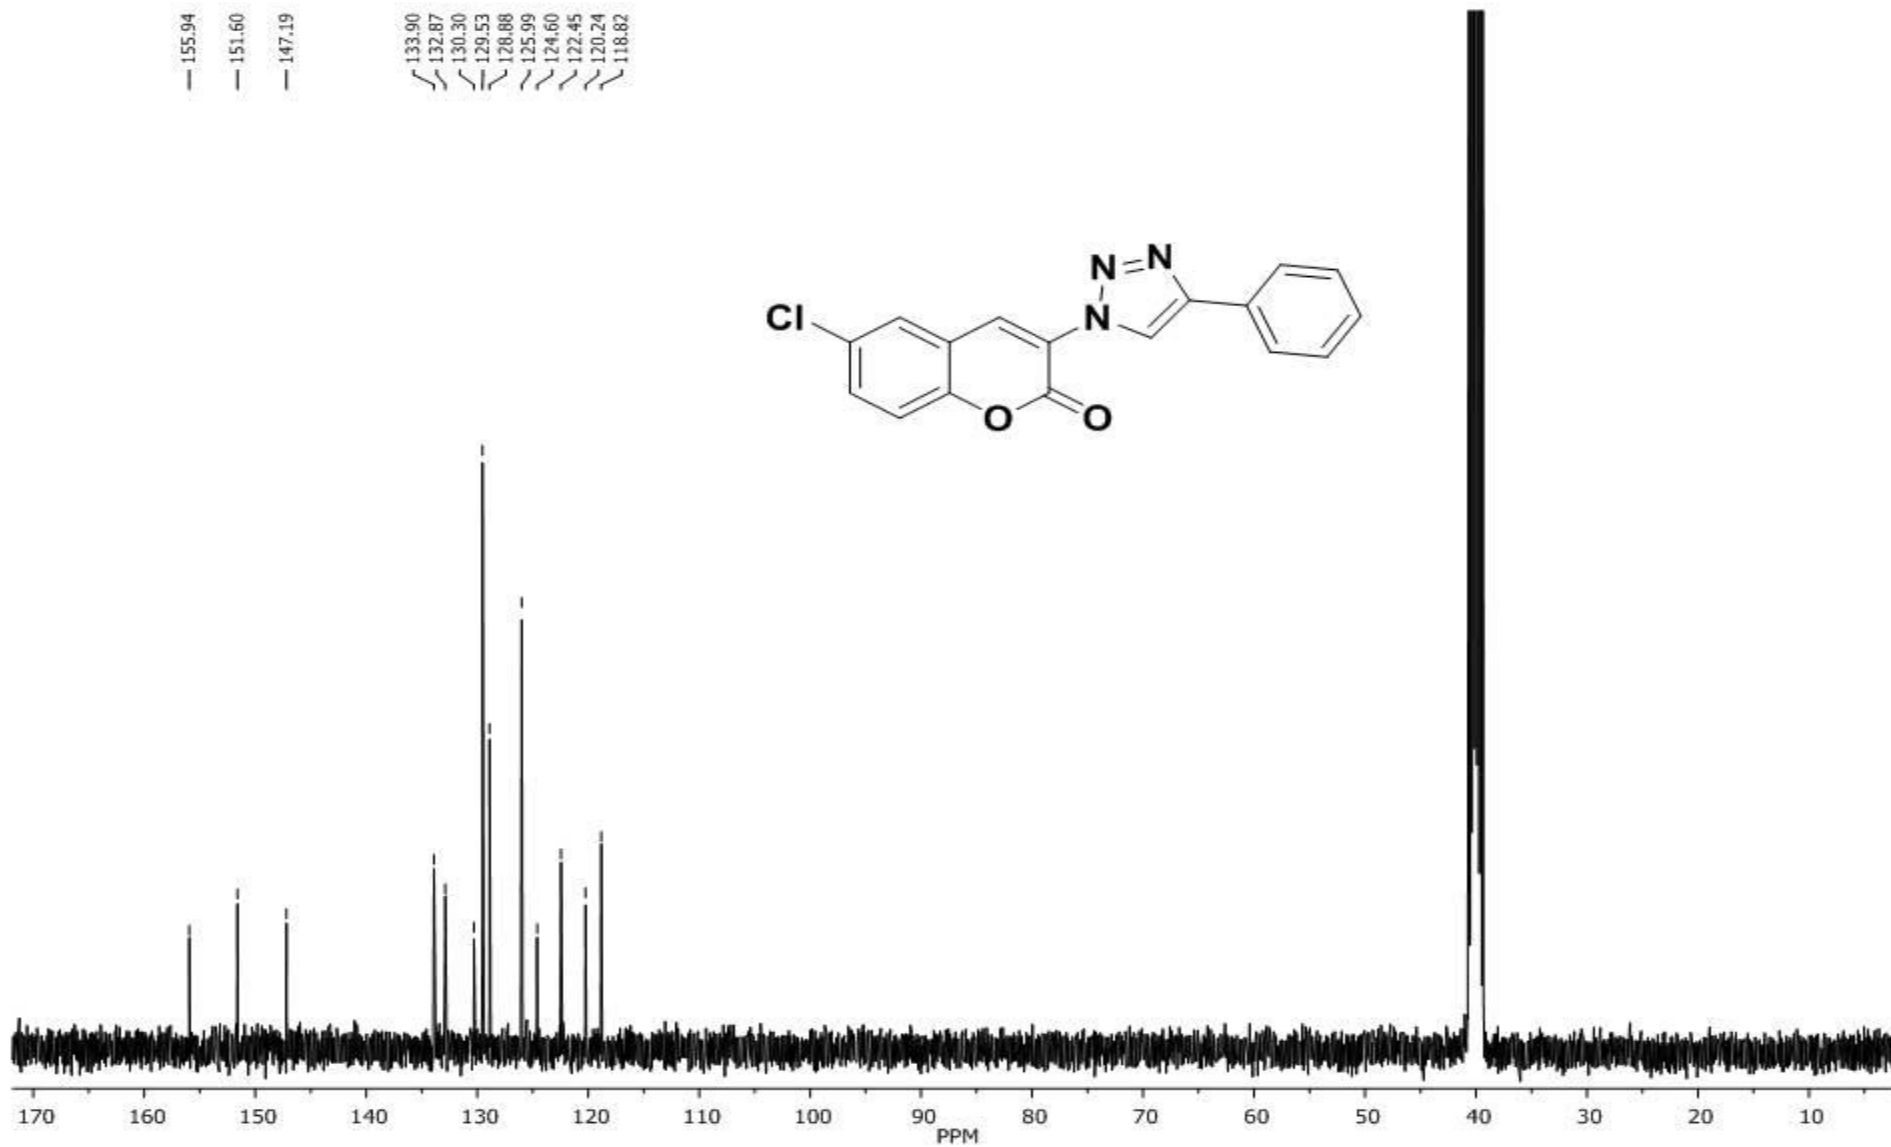



<sup>1</sup>H-NMR spectrum for compound 7-(diethylamino)-3-(4-phenyl-1H-1,2,3-triazol-1-yl)-2H-chromen-2-one (**5f**)

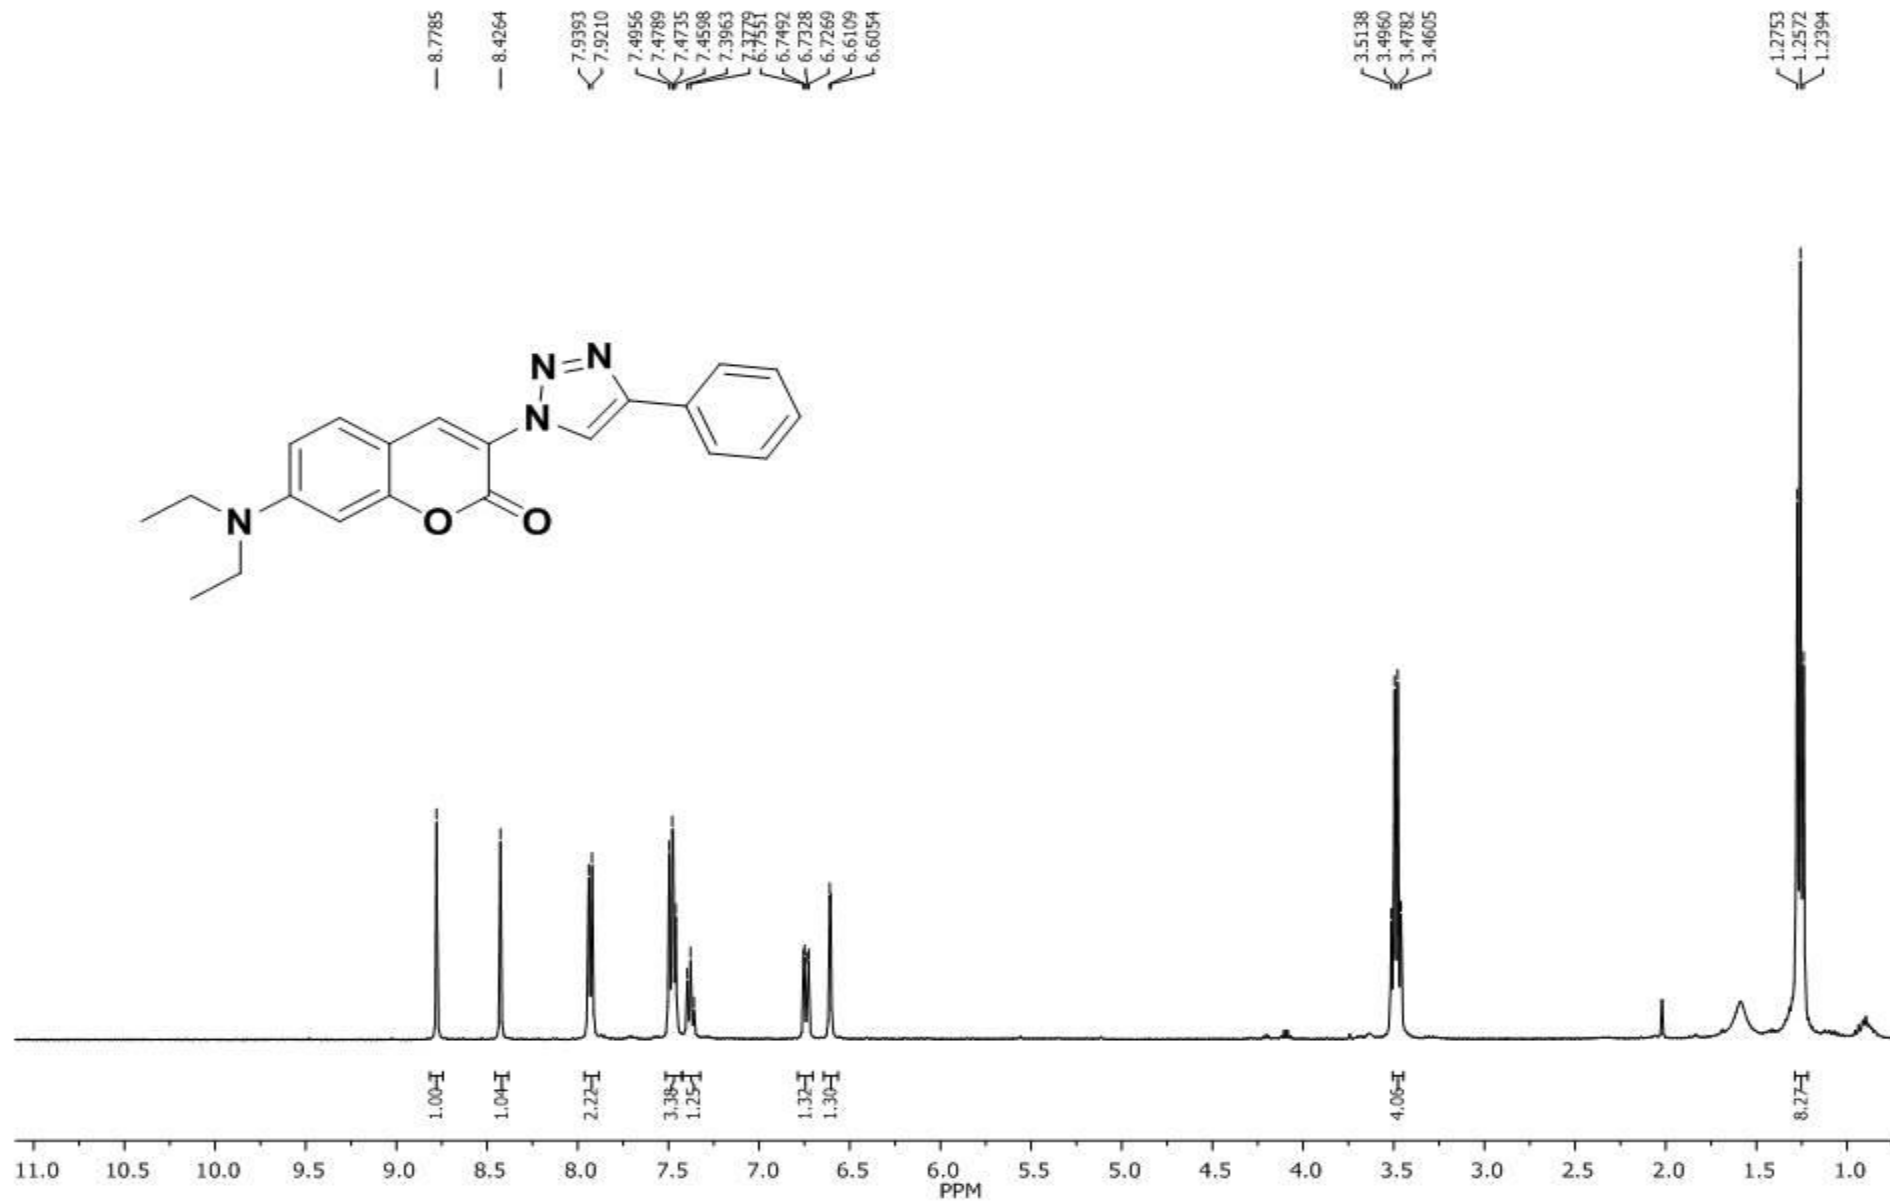

$^{13}\text{C}$ -NMR spectrum for compound 7-(diethylamino)-3-(4-phenyl-1*H*-1,2,3-triazol-1-yl)-2*H*-chromen-2-one (**5f**)

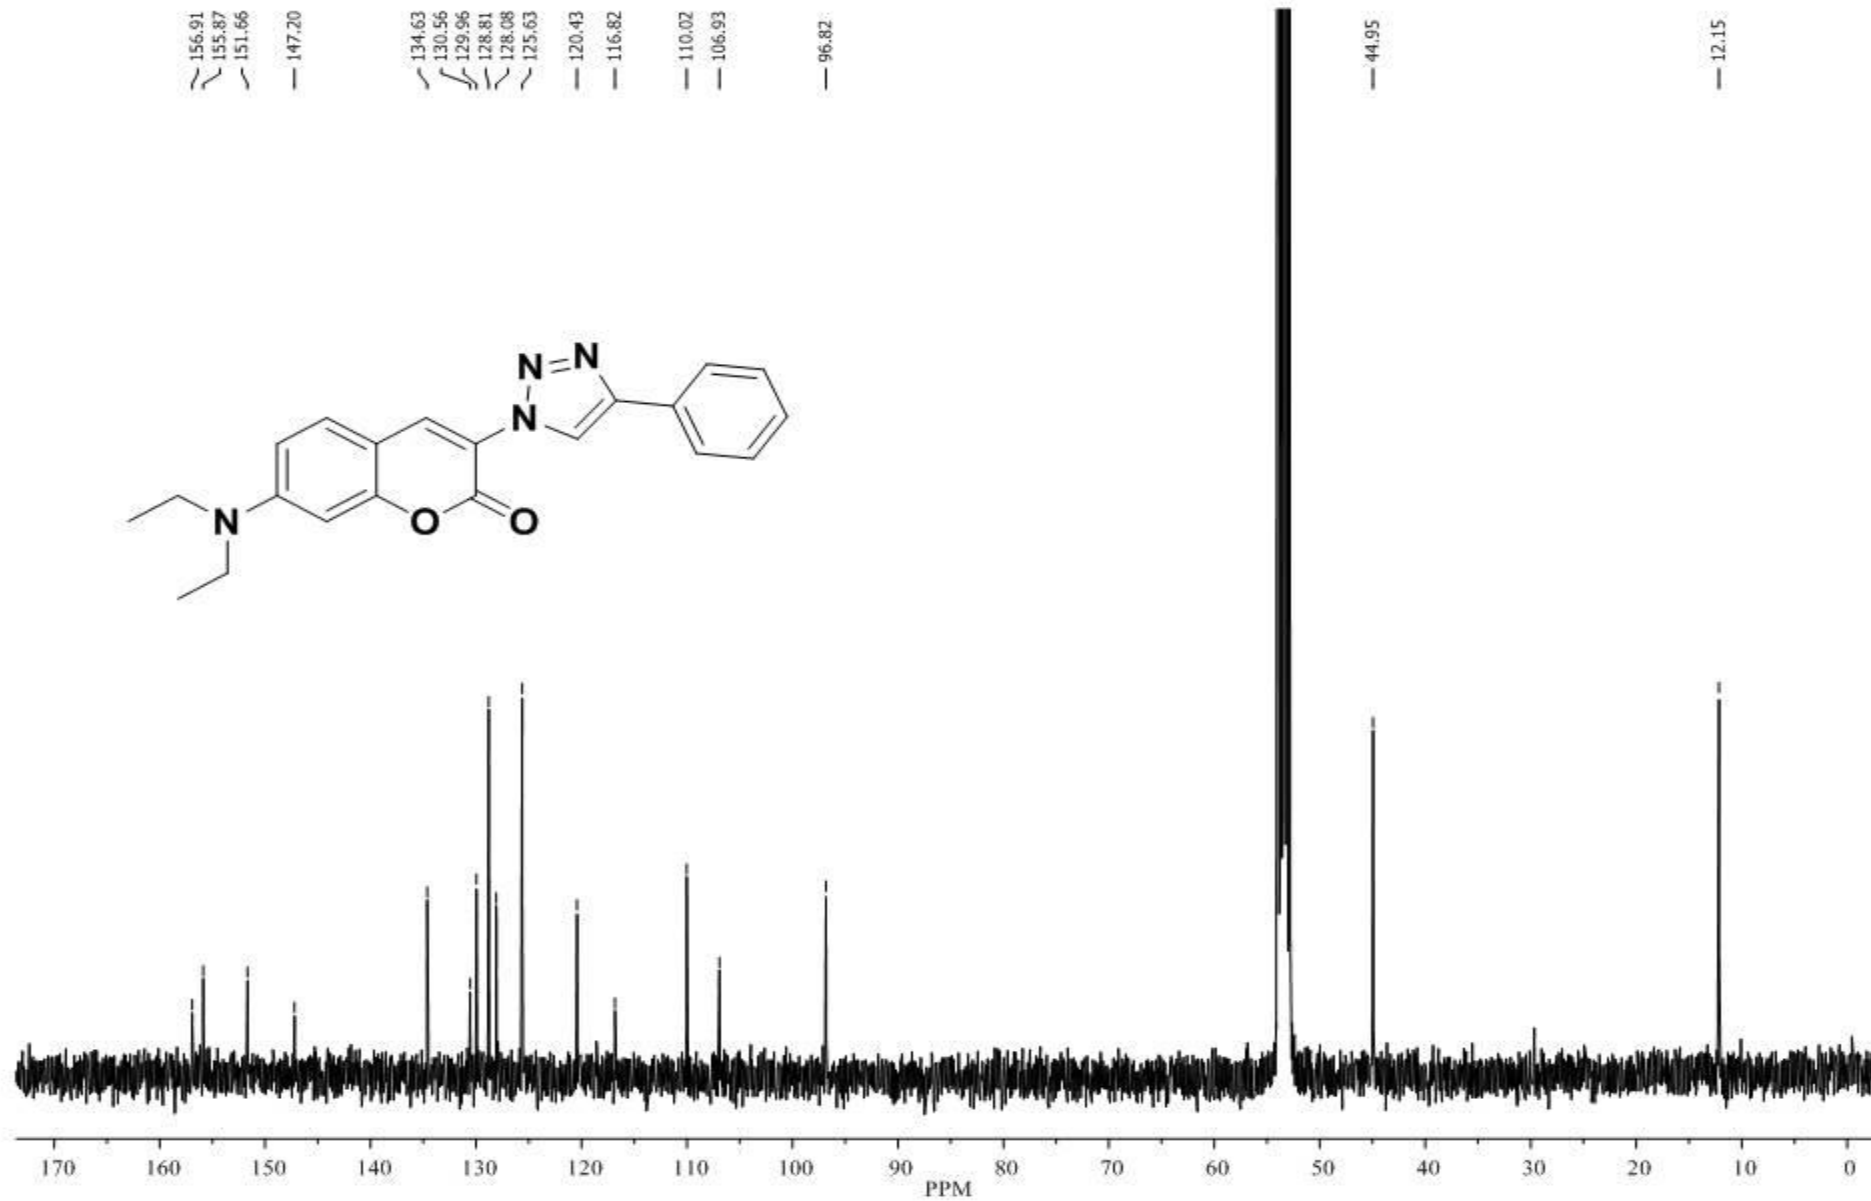

$^1\text{H-NMR}$  spectrum for compound 3-(4-(4-chlorophenyl)-1*H*-1,2,3-triazol-1-yl)-2*H*-chromen-2-one (**5g**)

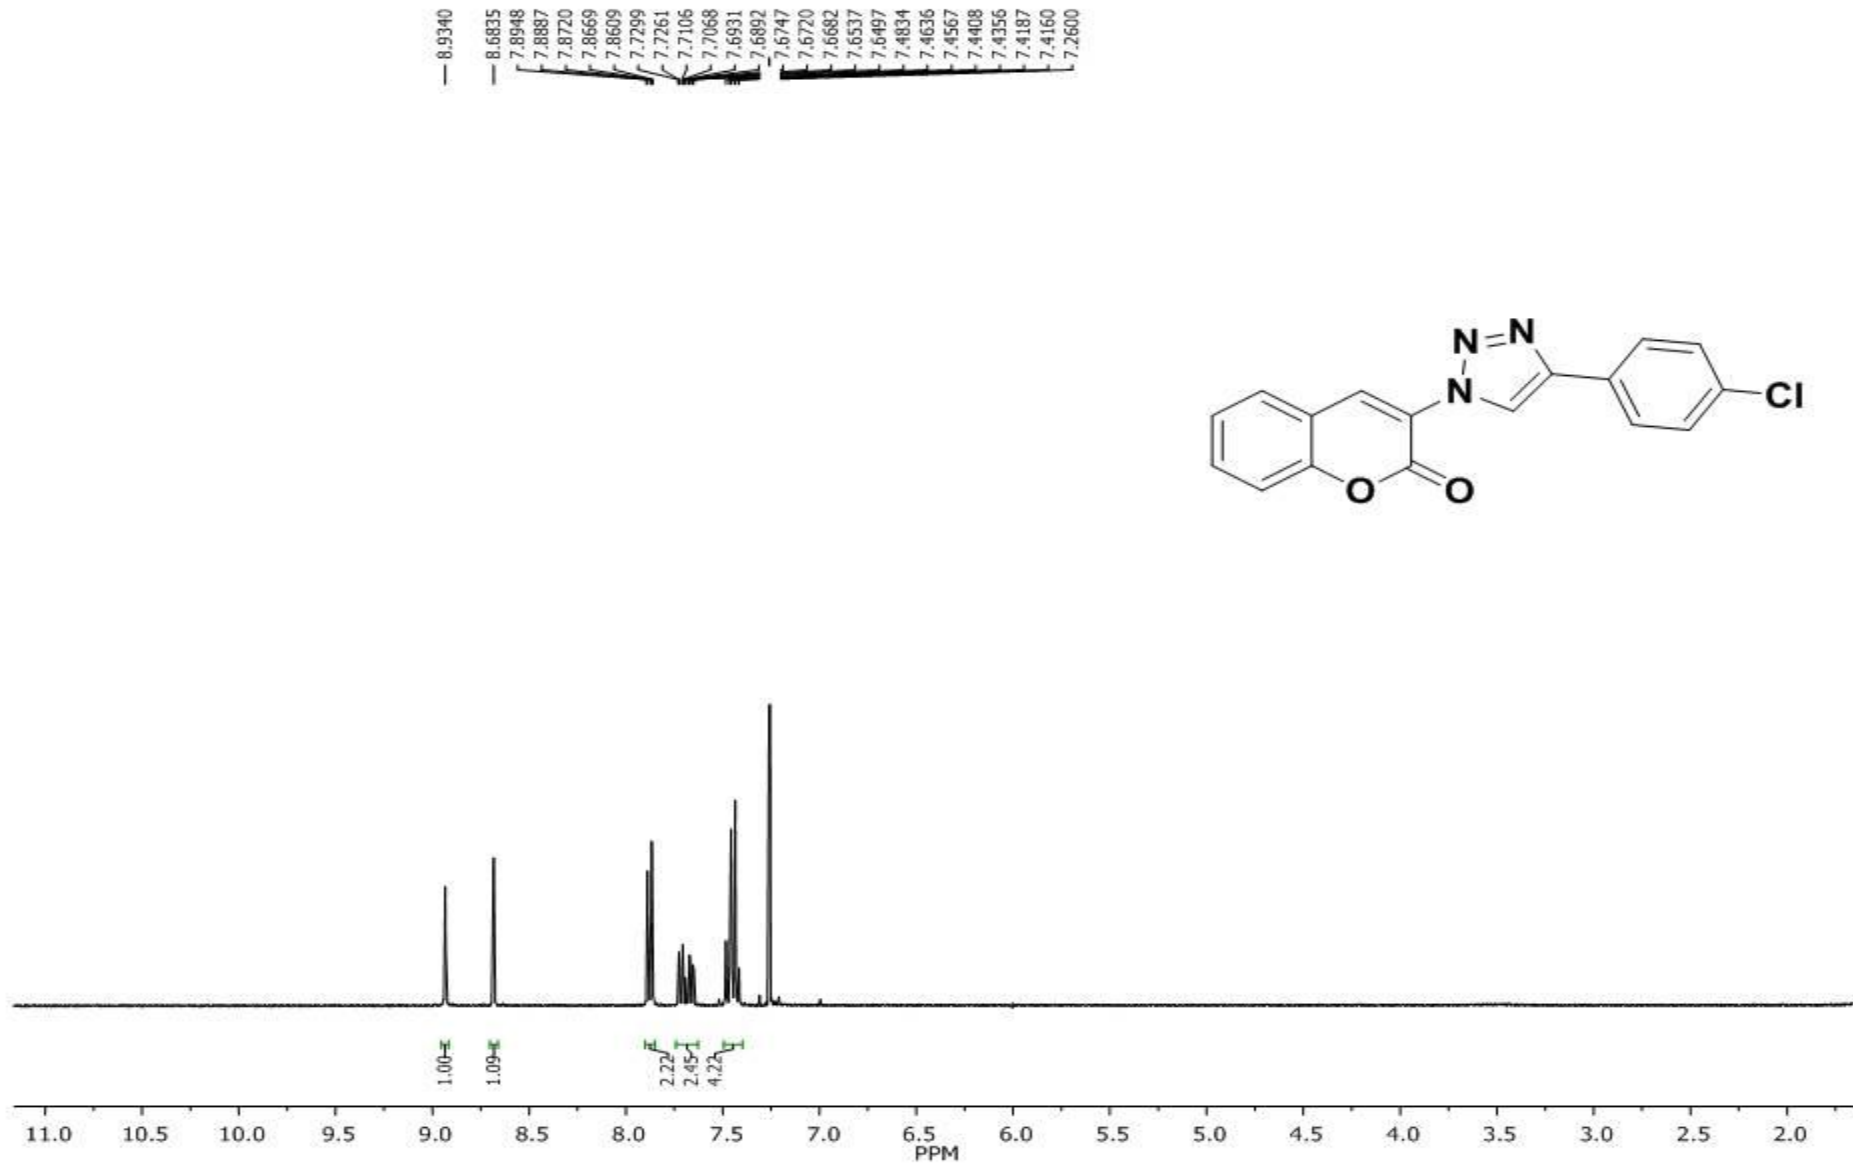

$^{13}\text{C}$ -NMR spectrum for compound 3-(4-(4-chlorophenyl)-1H-1,2,3-triazol-1-yl)-2H-chromen-2-one (**5g**)

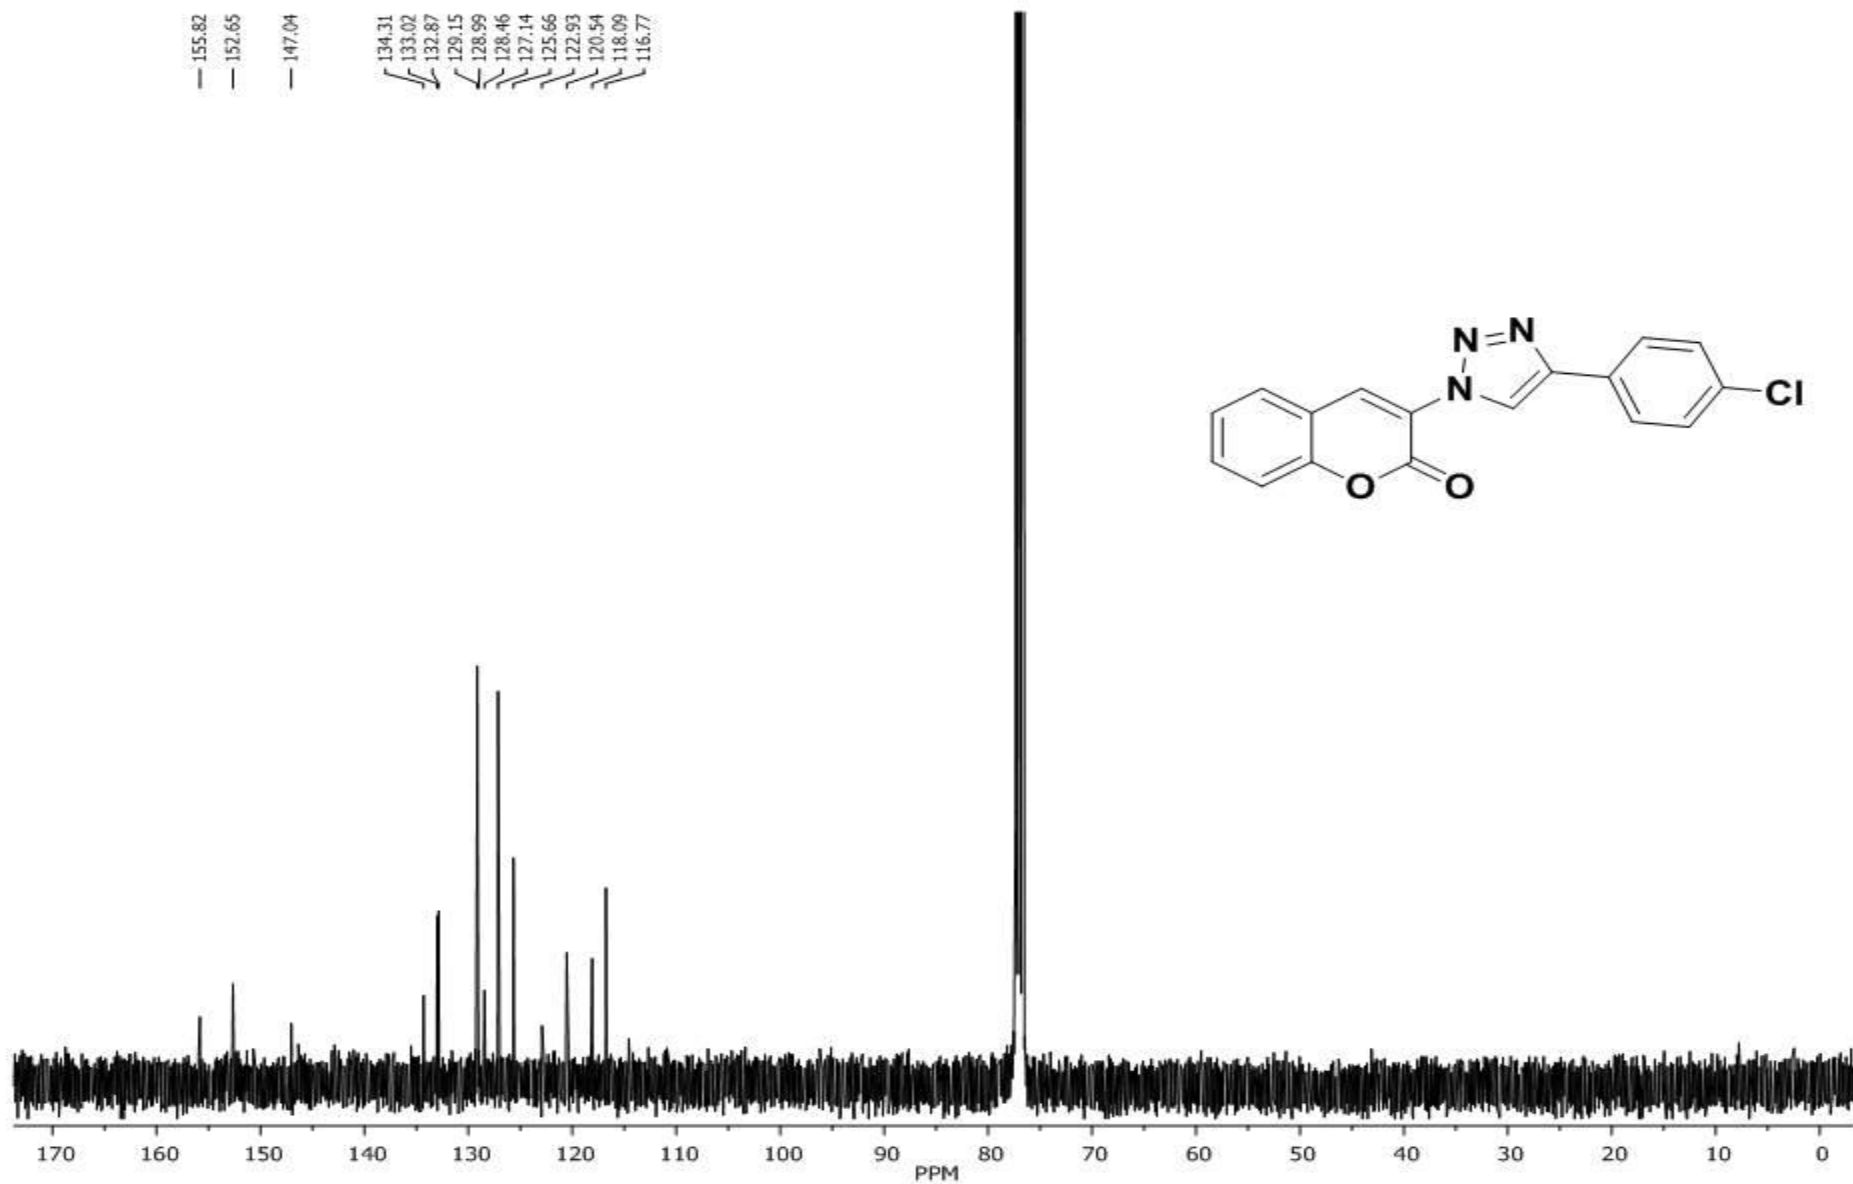

<sup>1</sup>H-NMR spectrum for compound 3-(4-(4-fluorophenyl)-1H-1,2,3-triazol-1-yl)-2H-chromen-2-one (**5h**)

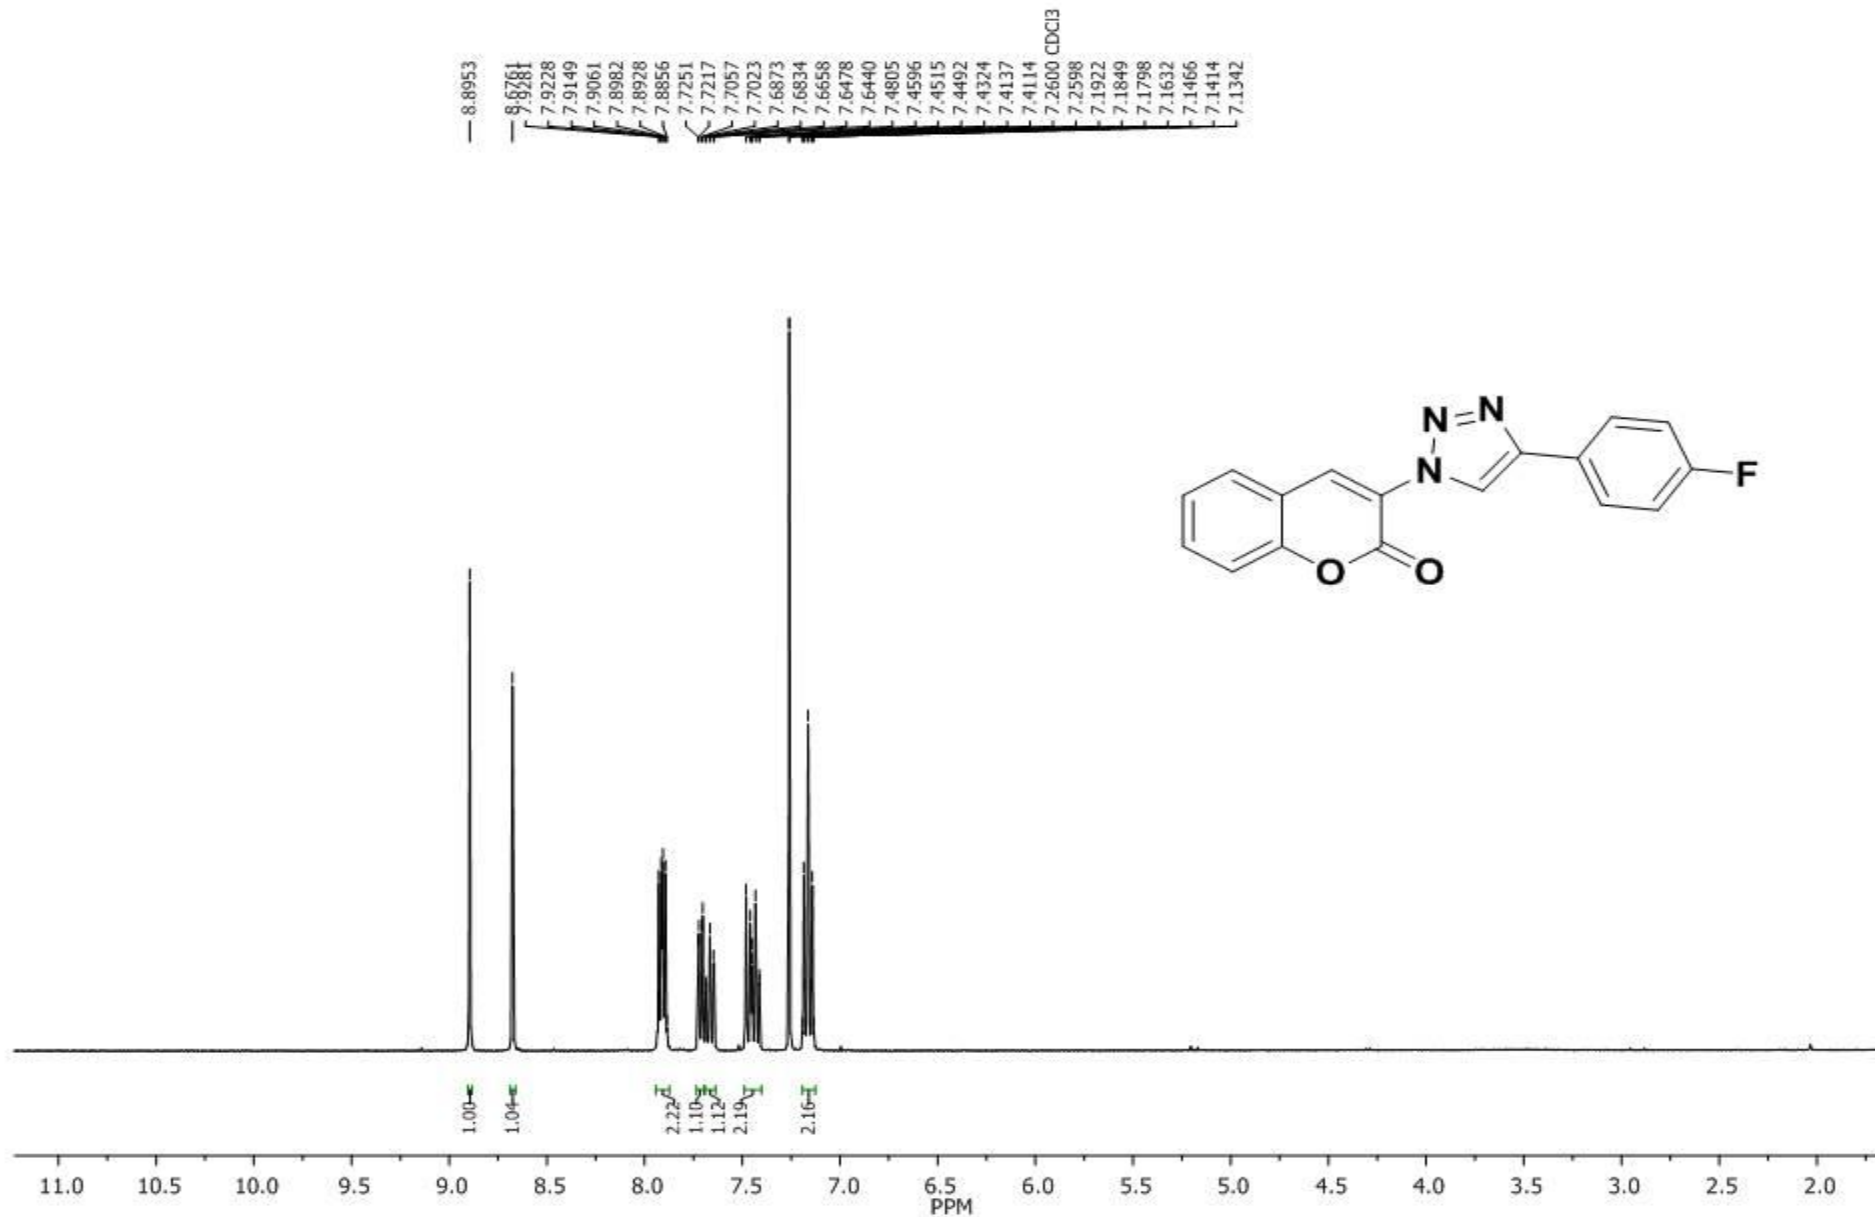

$^{13}\text{C}$ -NMR spectrum for compound 3-(4-(4-fluorophenyl)-1H-1,2,3-triazol-1-yl)-2H-chromen-2-one (**5h**)

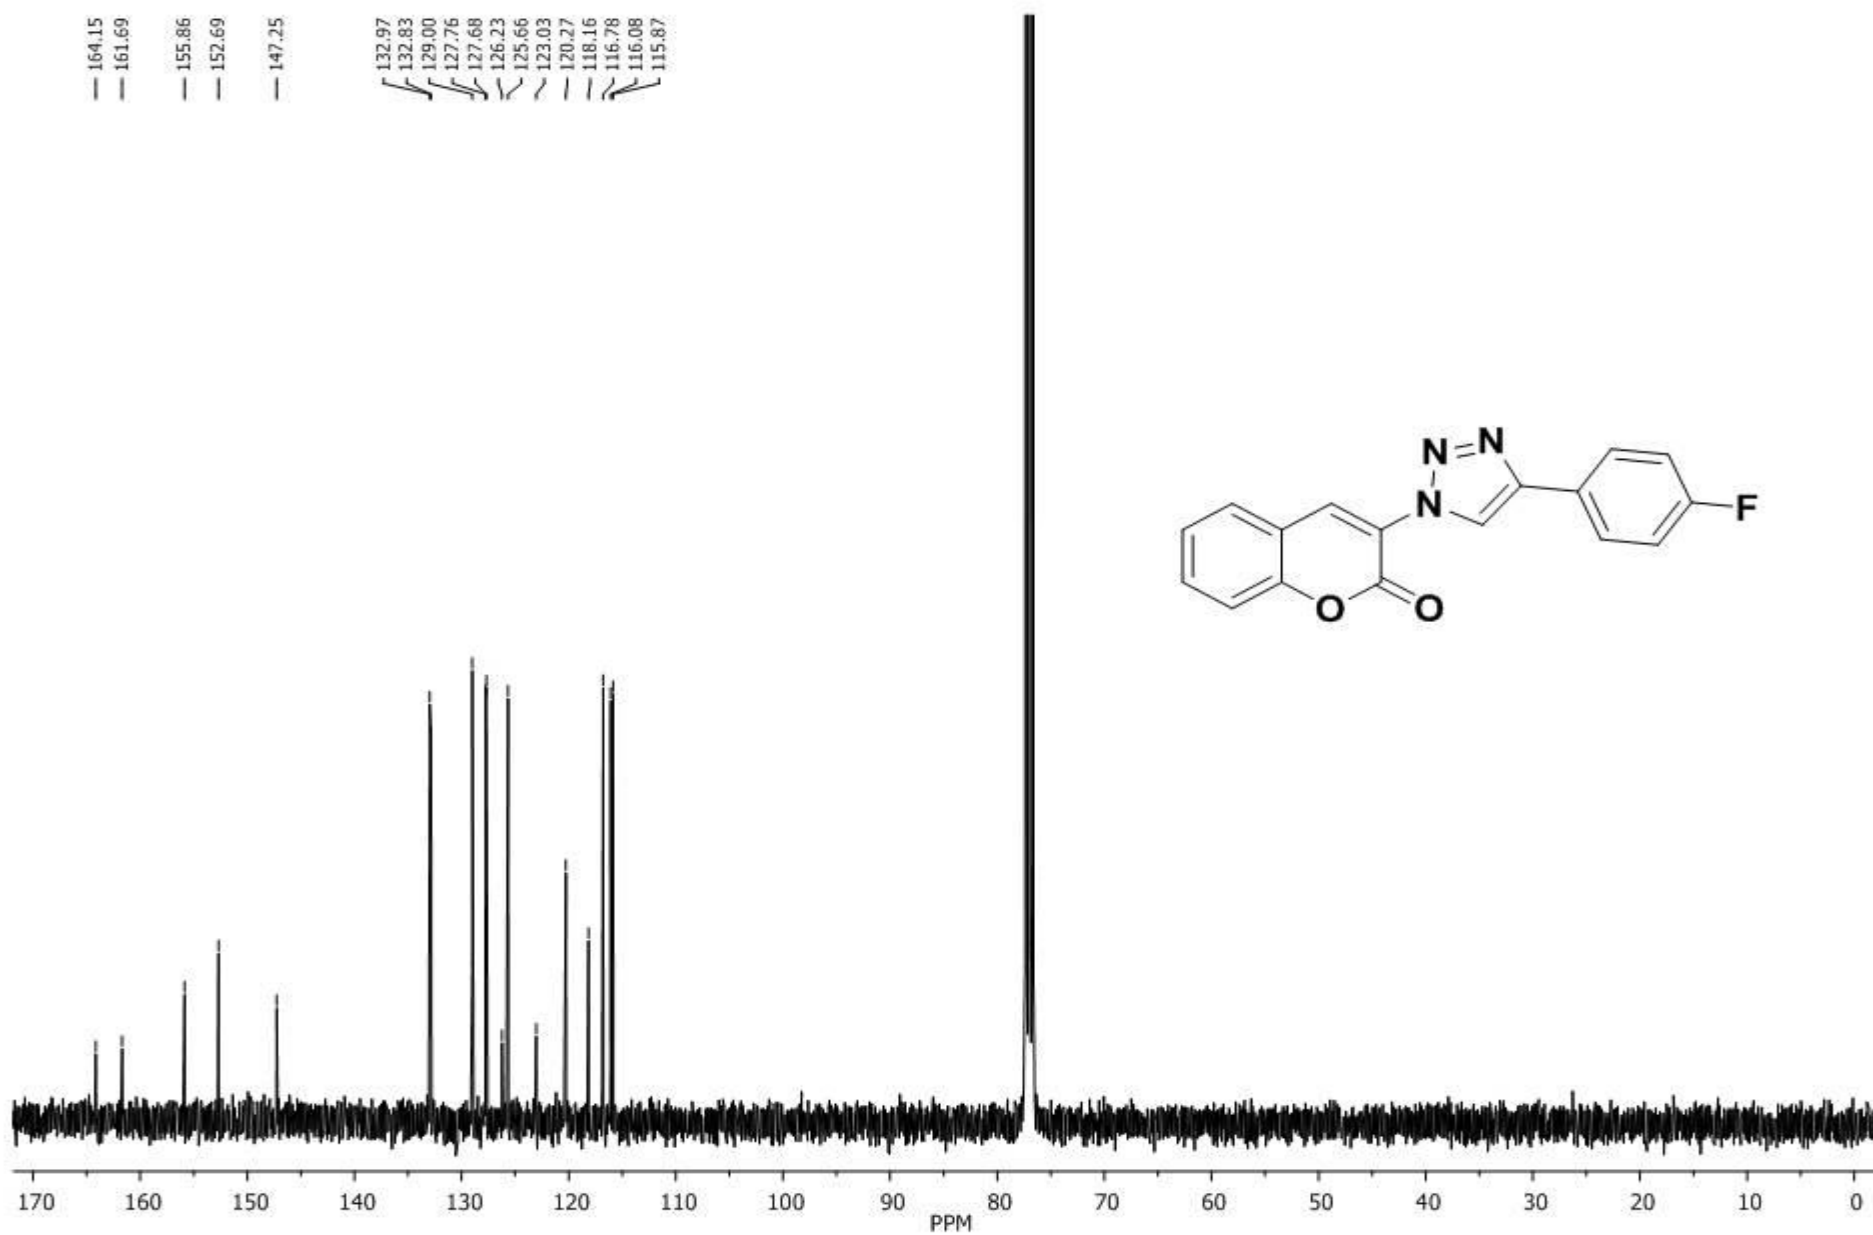

<sup>1</sup>H-NMR spectrum for compound 6-methoxy-3-(4-(4-methoxyphenyl)-1H-1,2,3-triazol-1-yl)-2H-chromen-2-one (**5i**)

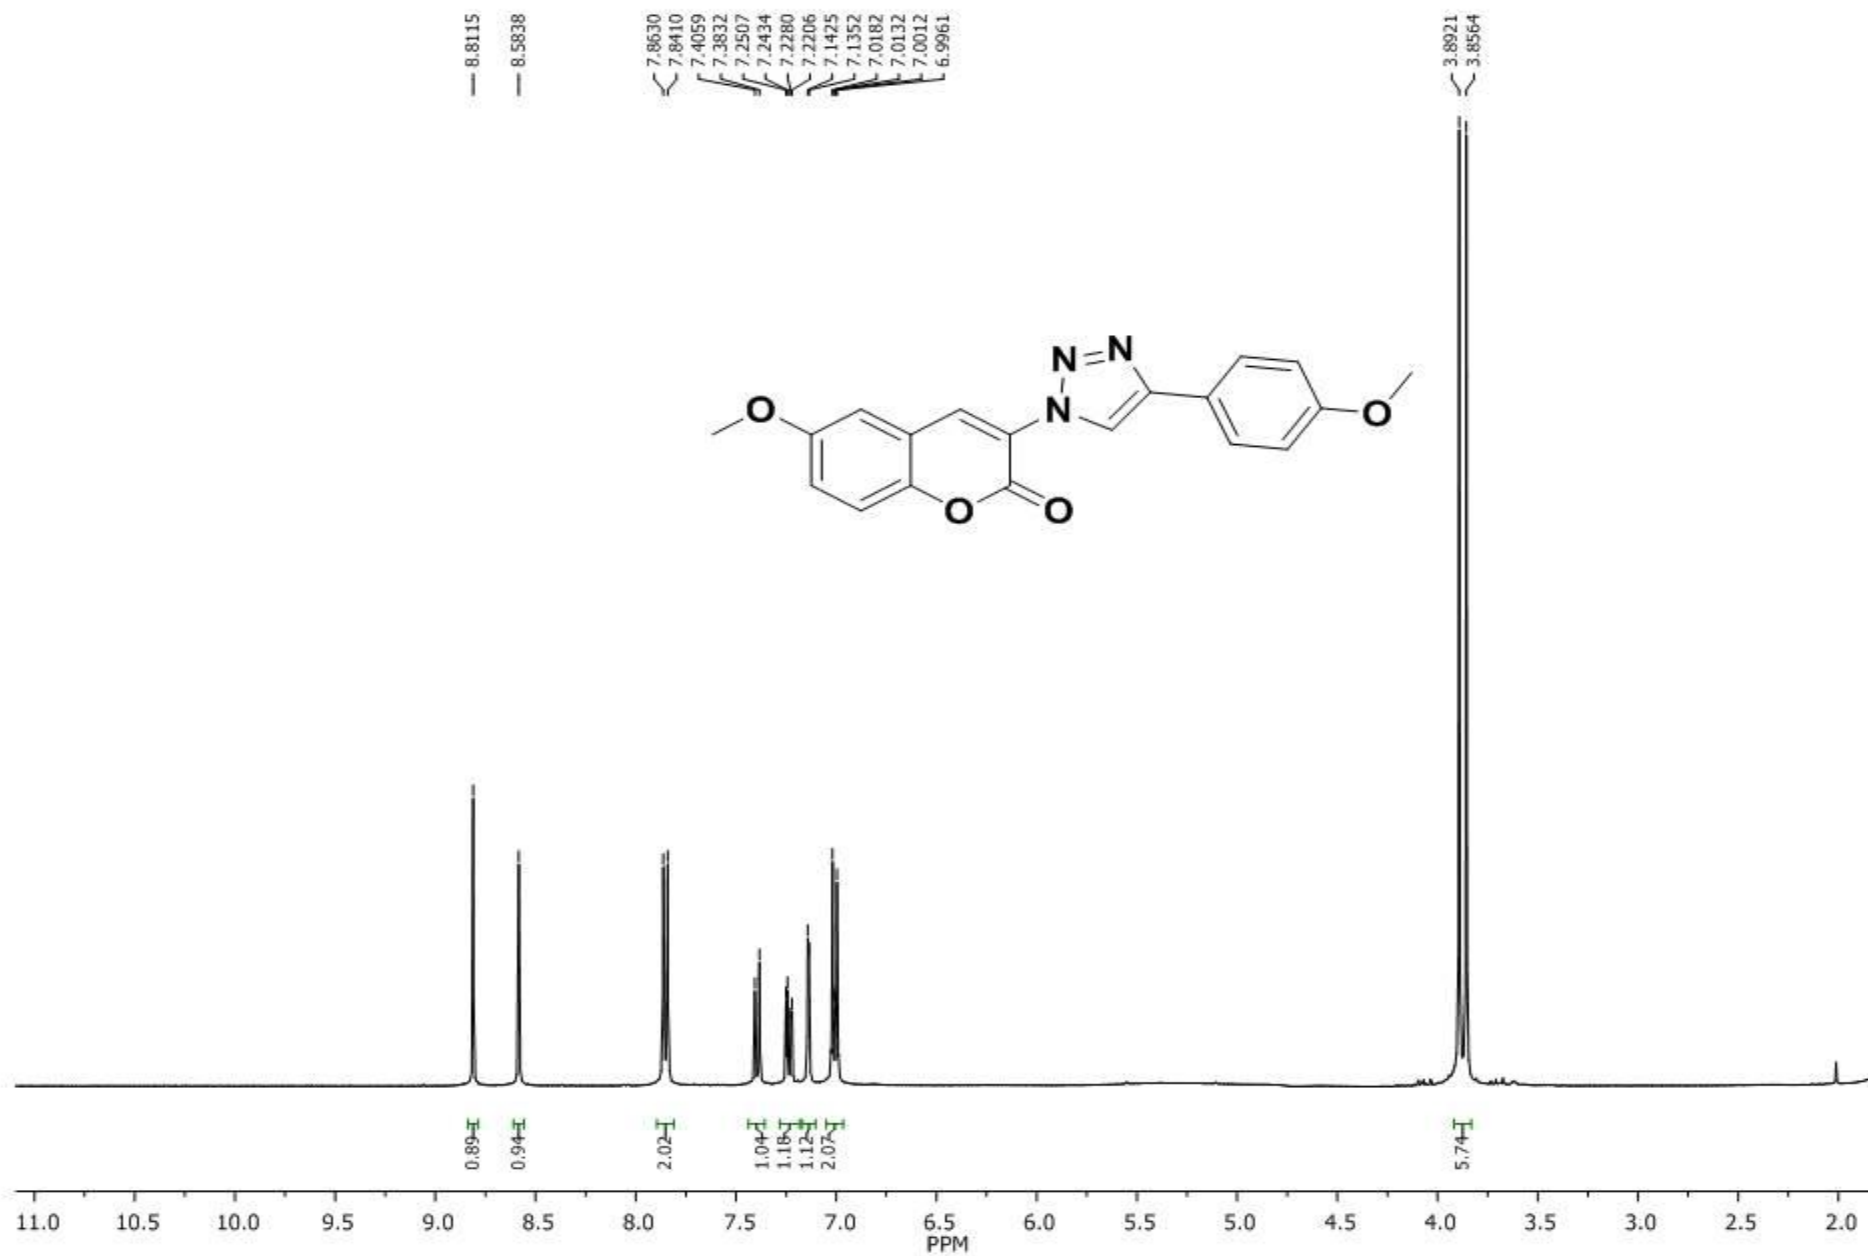

$^{13}\text{C}$ -NMR spectrum for compound 6-methoxy-3-(4-(4-methoxyphenyl)-1*H*-1,2,3-triazol-1-yl)-2*H*-chromen-2-one (**5i**)

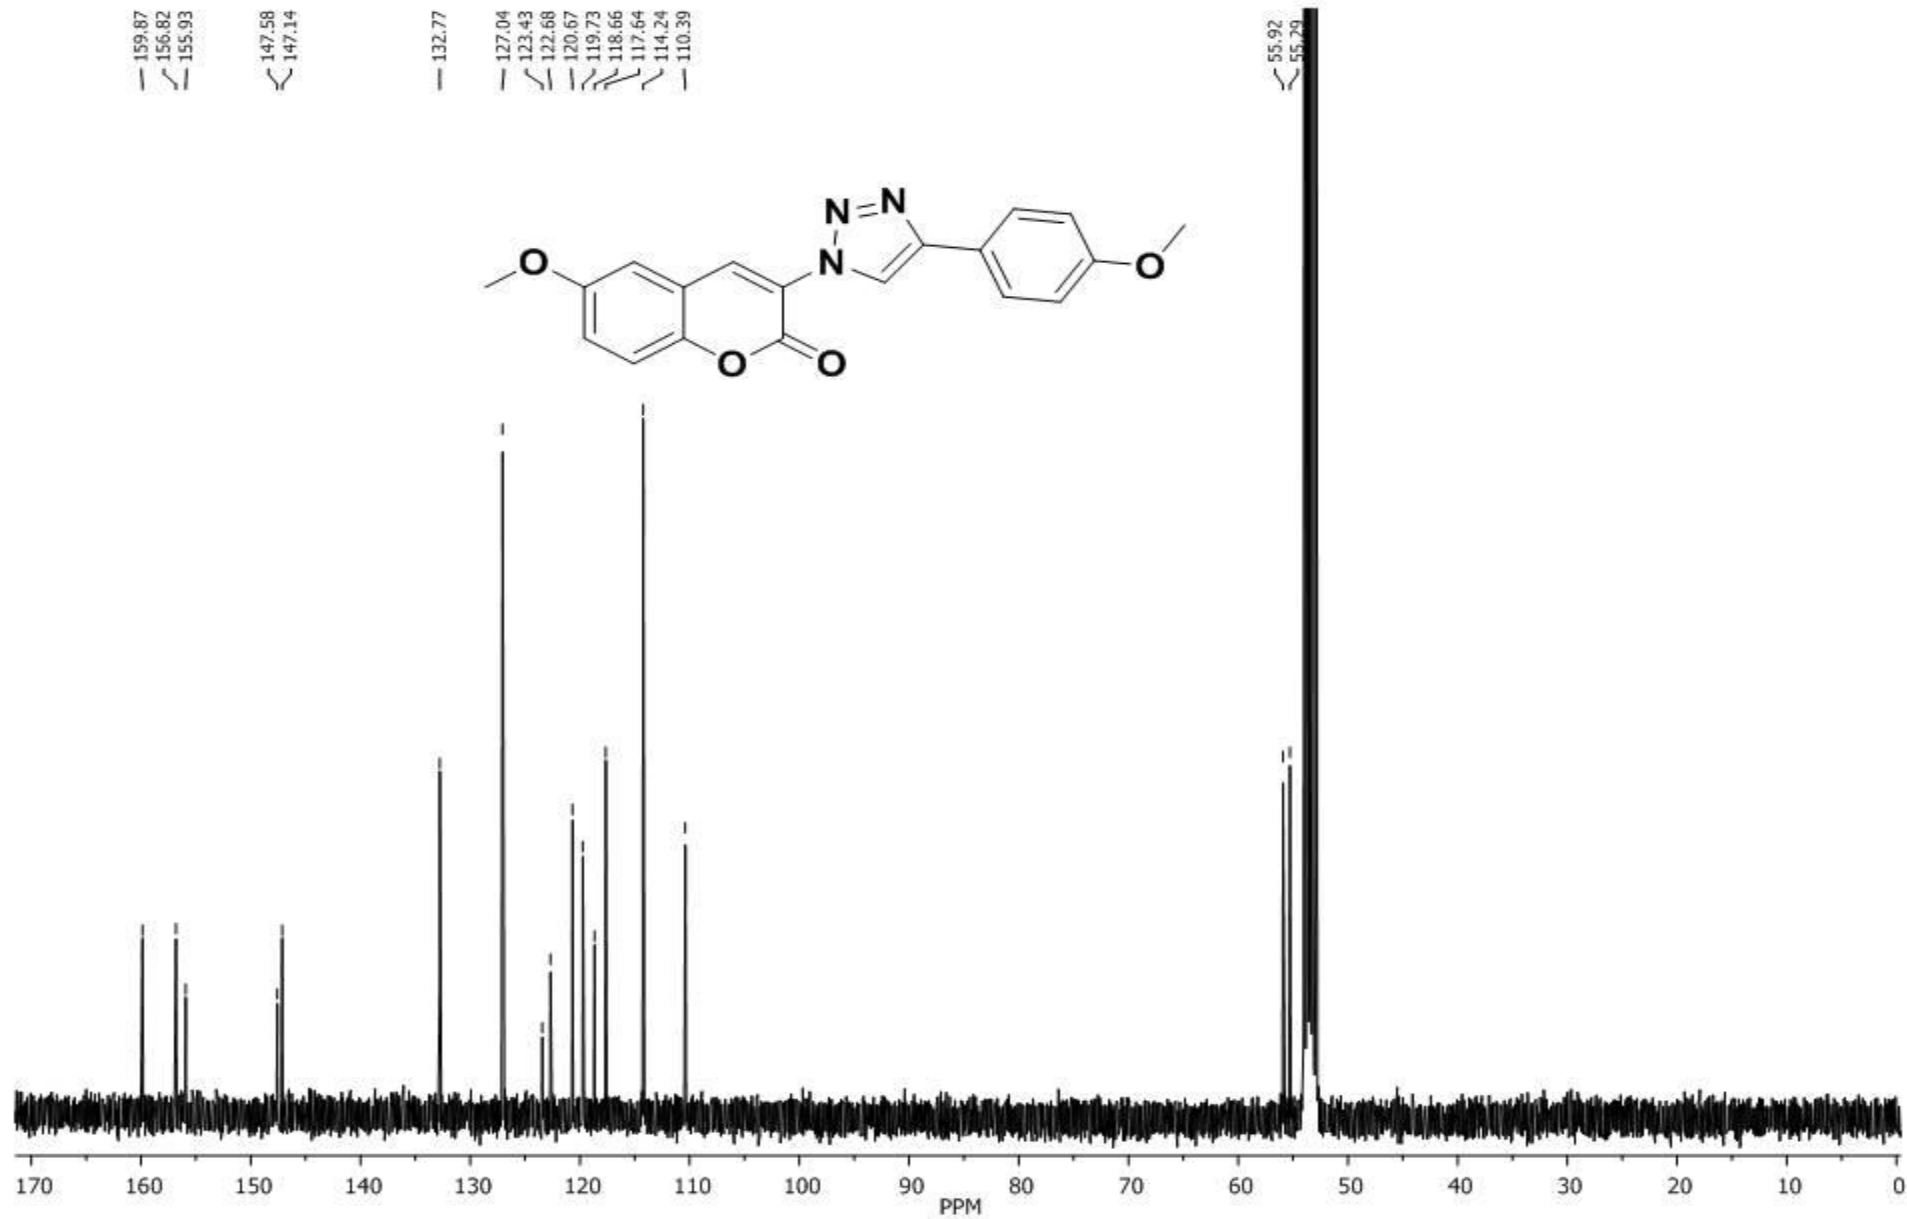



<sup>1</sup>H-NMR spectrum for compound 3-(4-(4-chlorophenyl)-1H-1,2,3-triazol-1-yl)-6-methoxy-2H-chromen-2-one (**5j**)

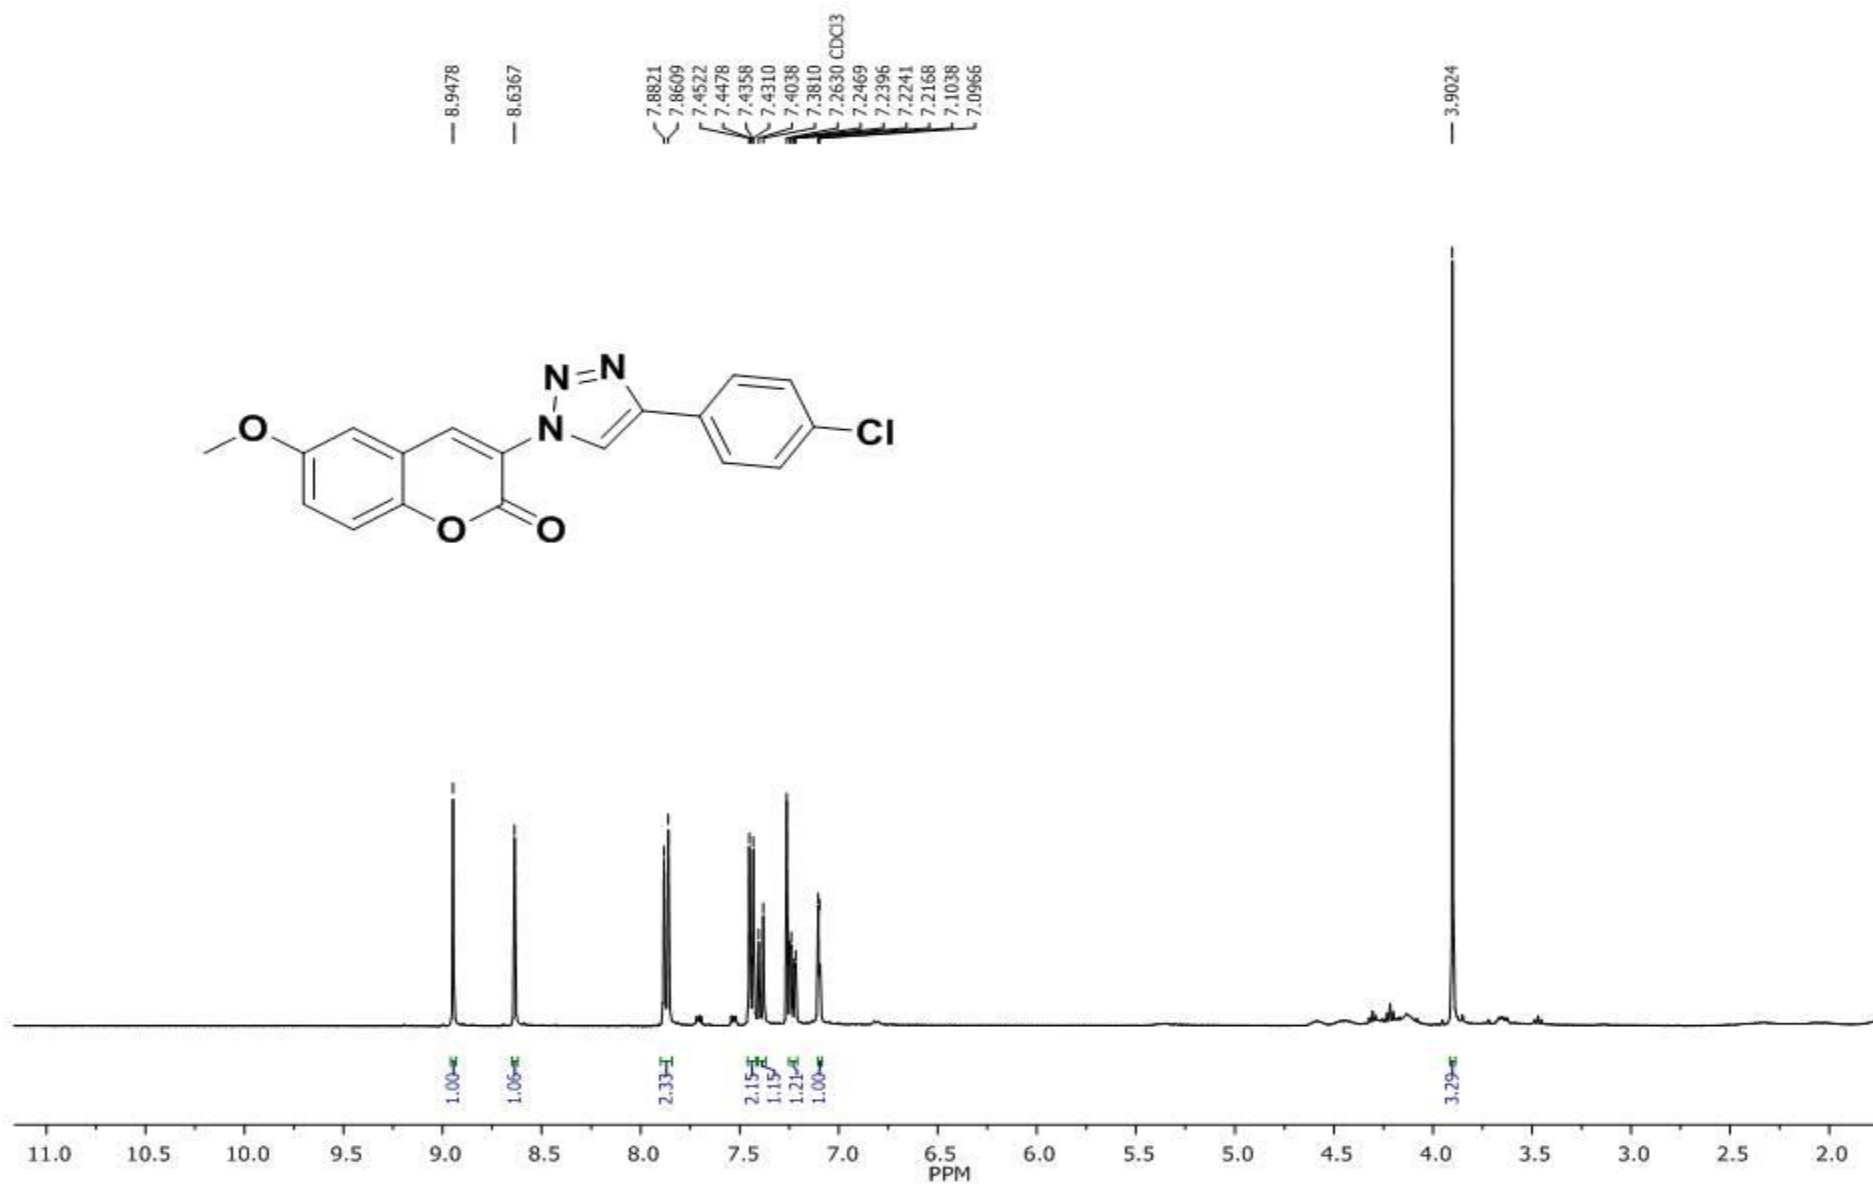

$^{13}\text{C}$ -NMR spectrum for compound 3-(4-(4-chlorophenyl)-1*H*-1,2,3-triazol-1-yl)-6-methoxy-2*H*-chromen-2-one (**5j**)

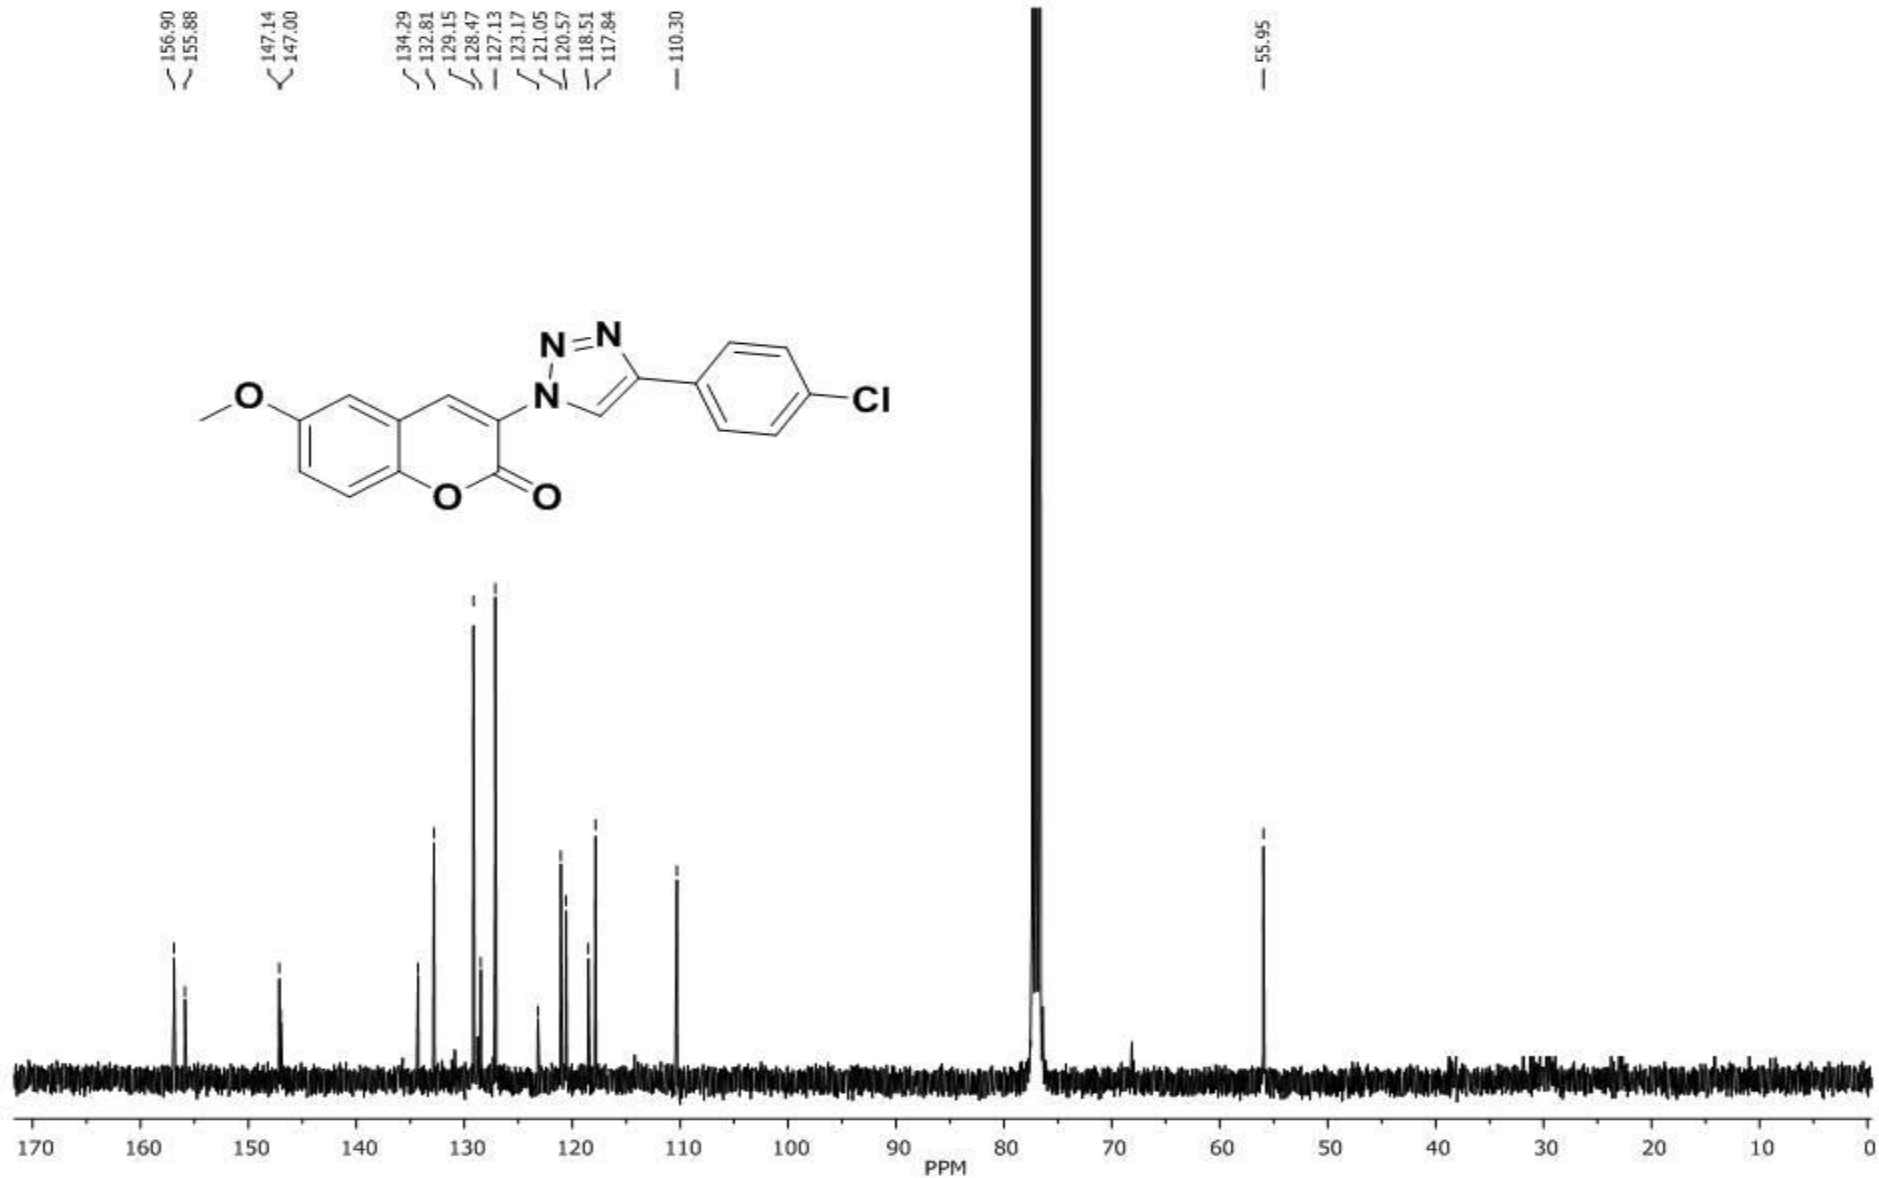

<sup>1</sup>H-NMR spectrum for compound 7-methoxy-3-(4-(4-methoxyphenyl)-1H-1,2,3-triazol-1-yl)-2H-chromen-2-one (**5k**)

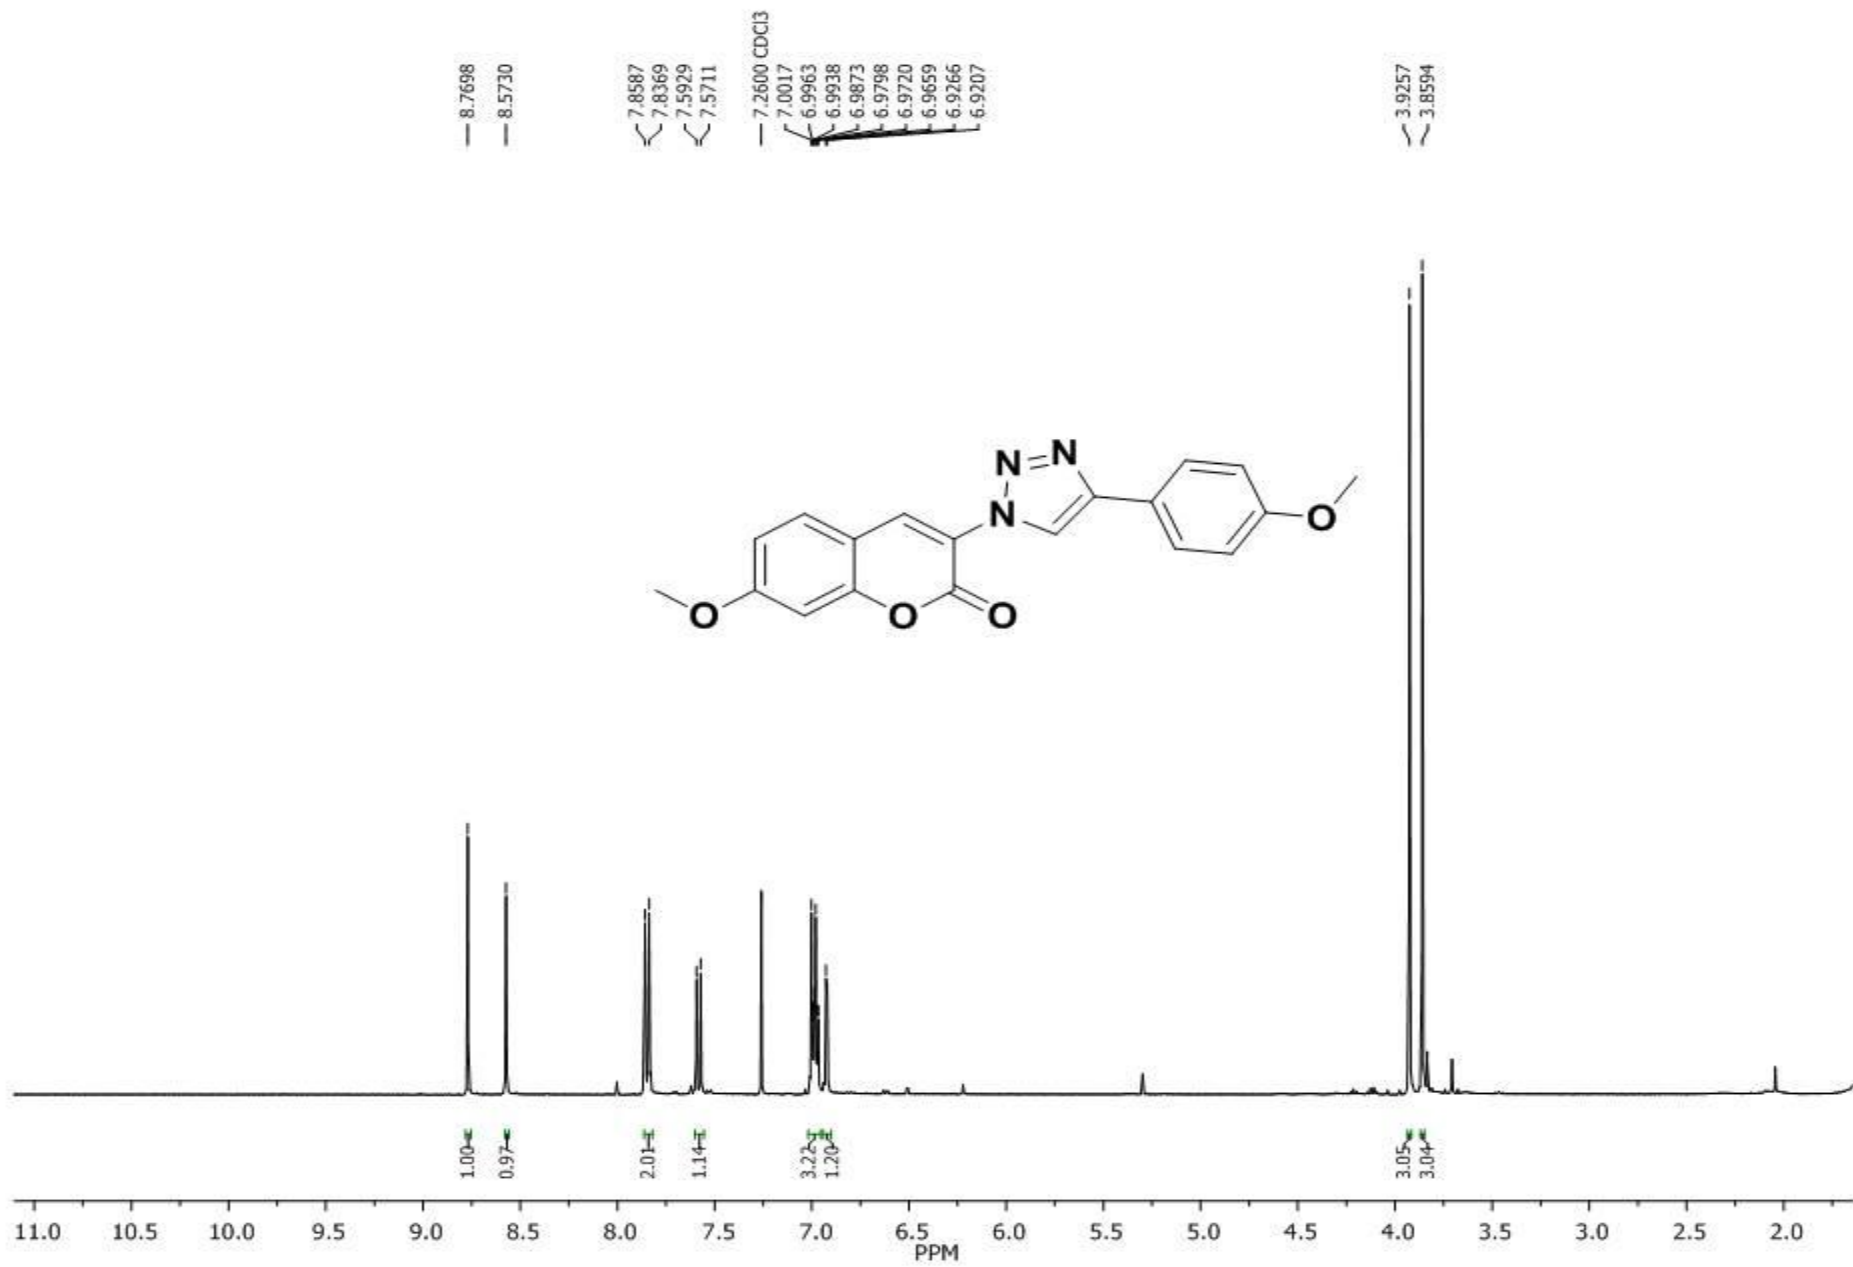

$^{13}\text{C}$ -NMR spectrum for compound 7-methoxy-3-(4-(4-methoxyphenyl)-1*H*-1,2,3-triazol-1-yl)-2*H*-chromen-2-one (**5k**)

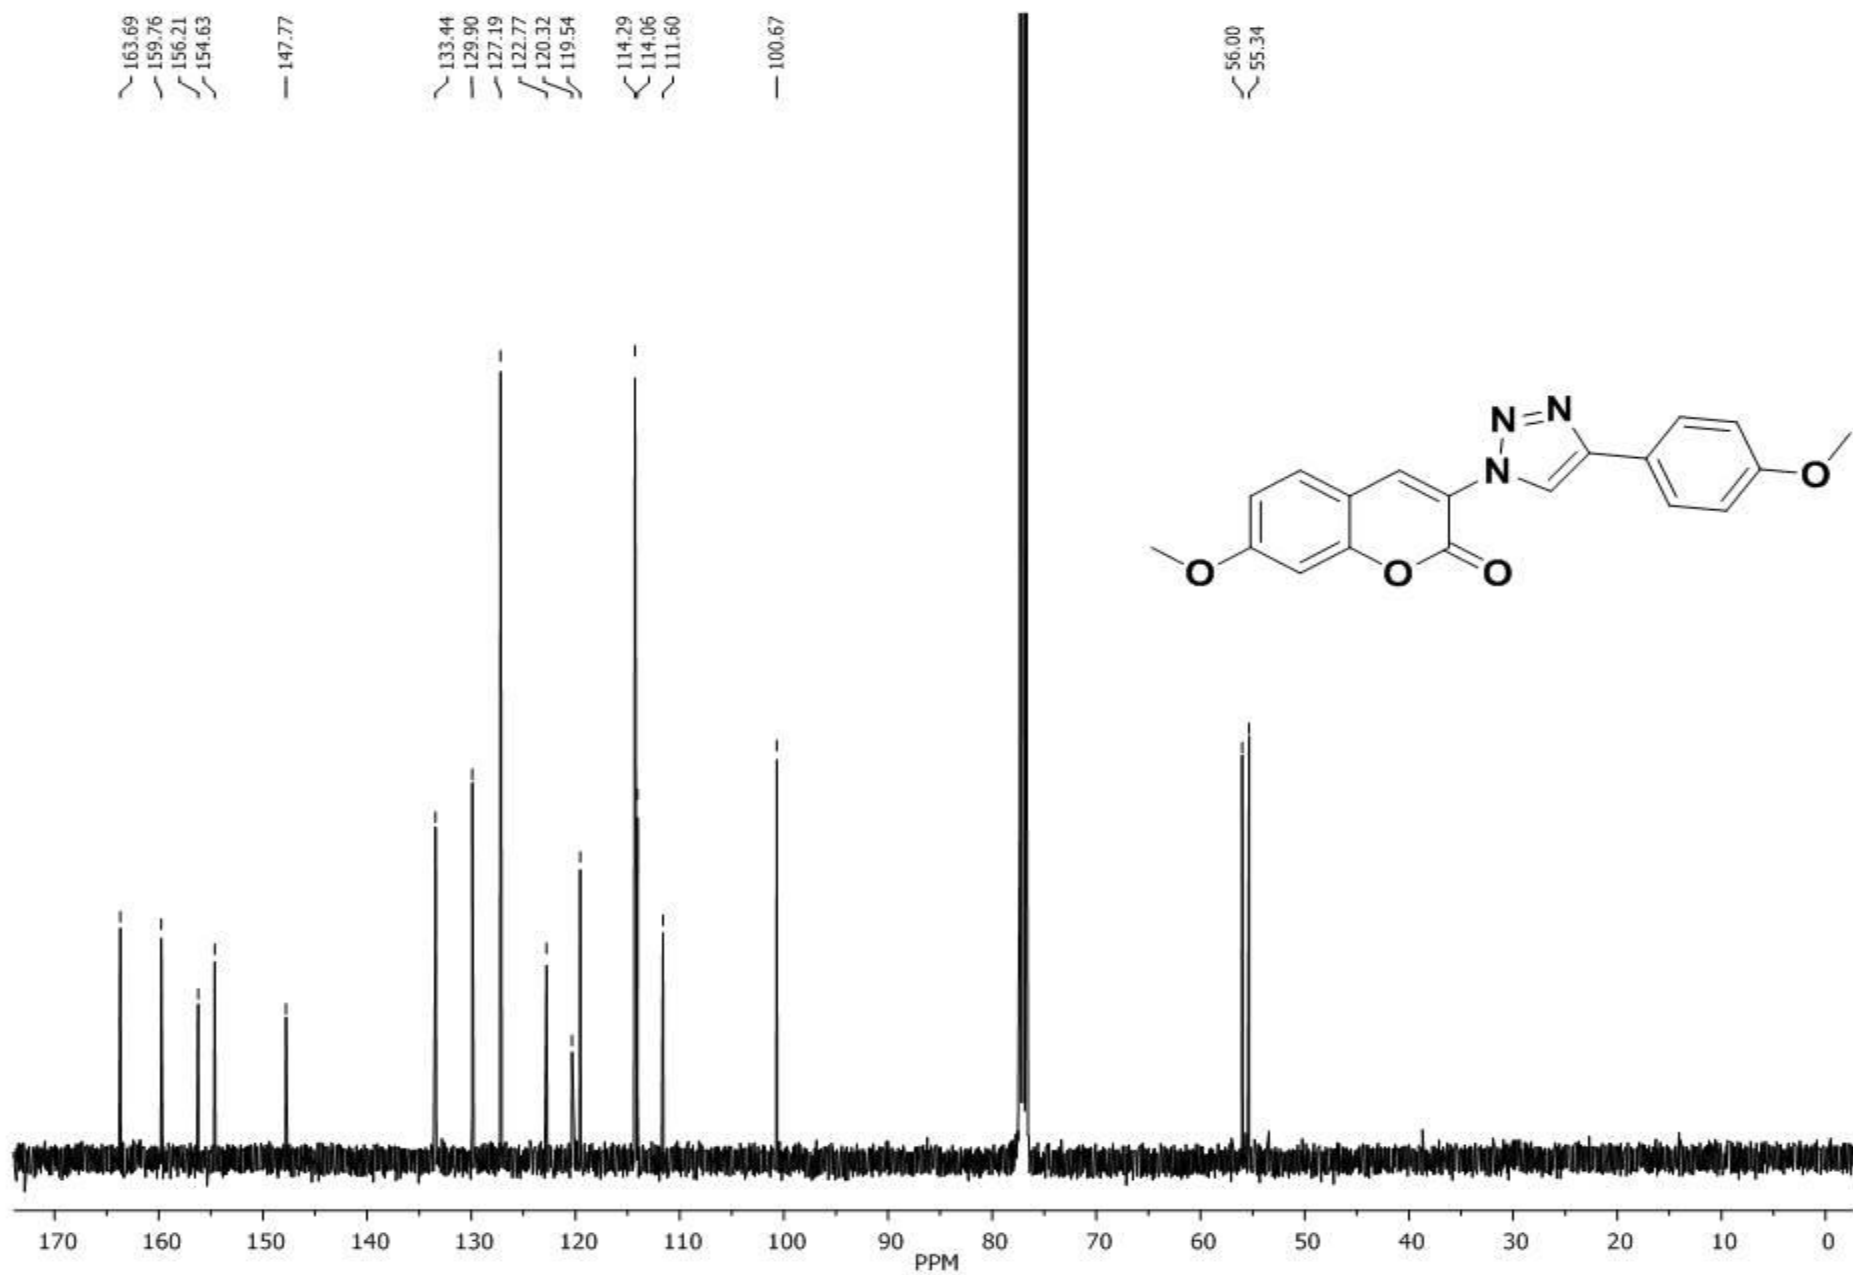

$^{13}\text{H}$ -NMR spectrum for compound 3-(4-(pyridin-2-yl)-1H-1,2,3-triazol-1-yl)-2H-chromen-2-one (**5l**)

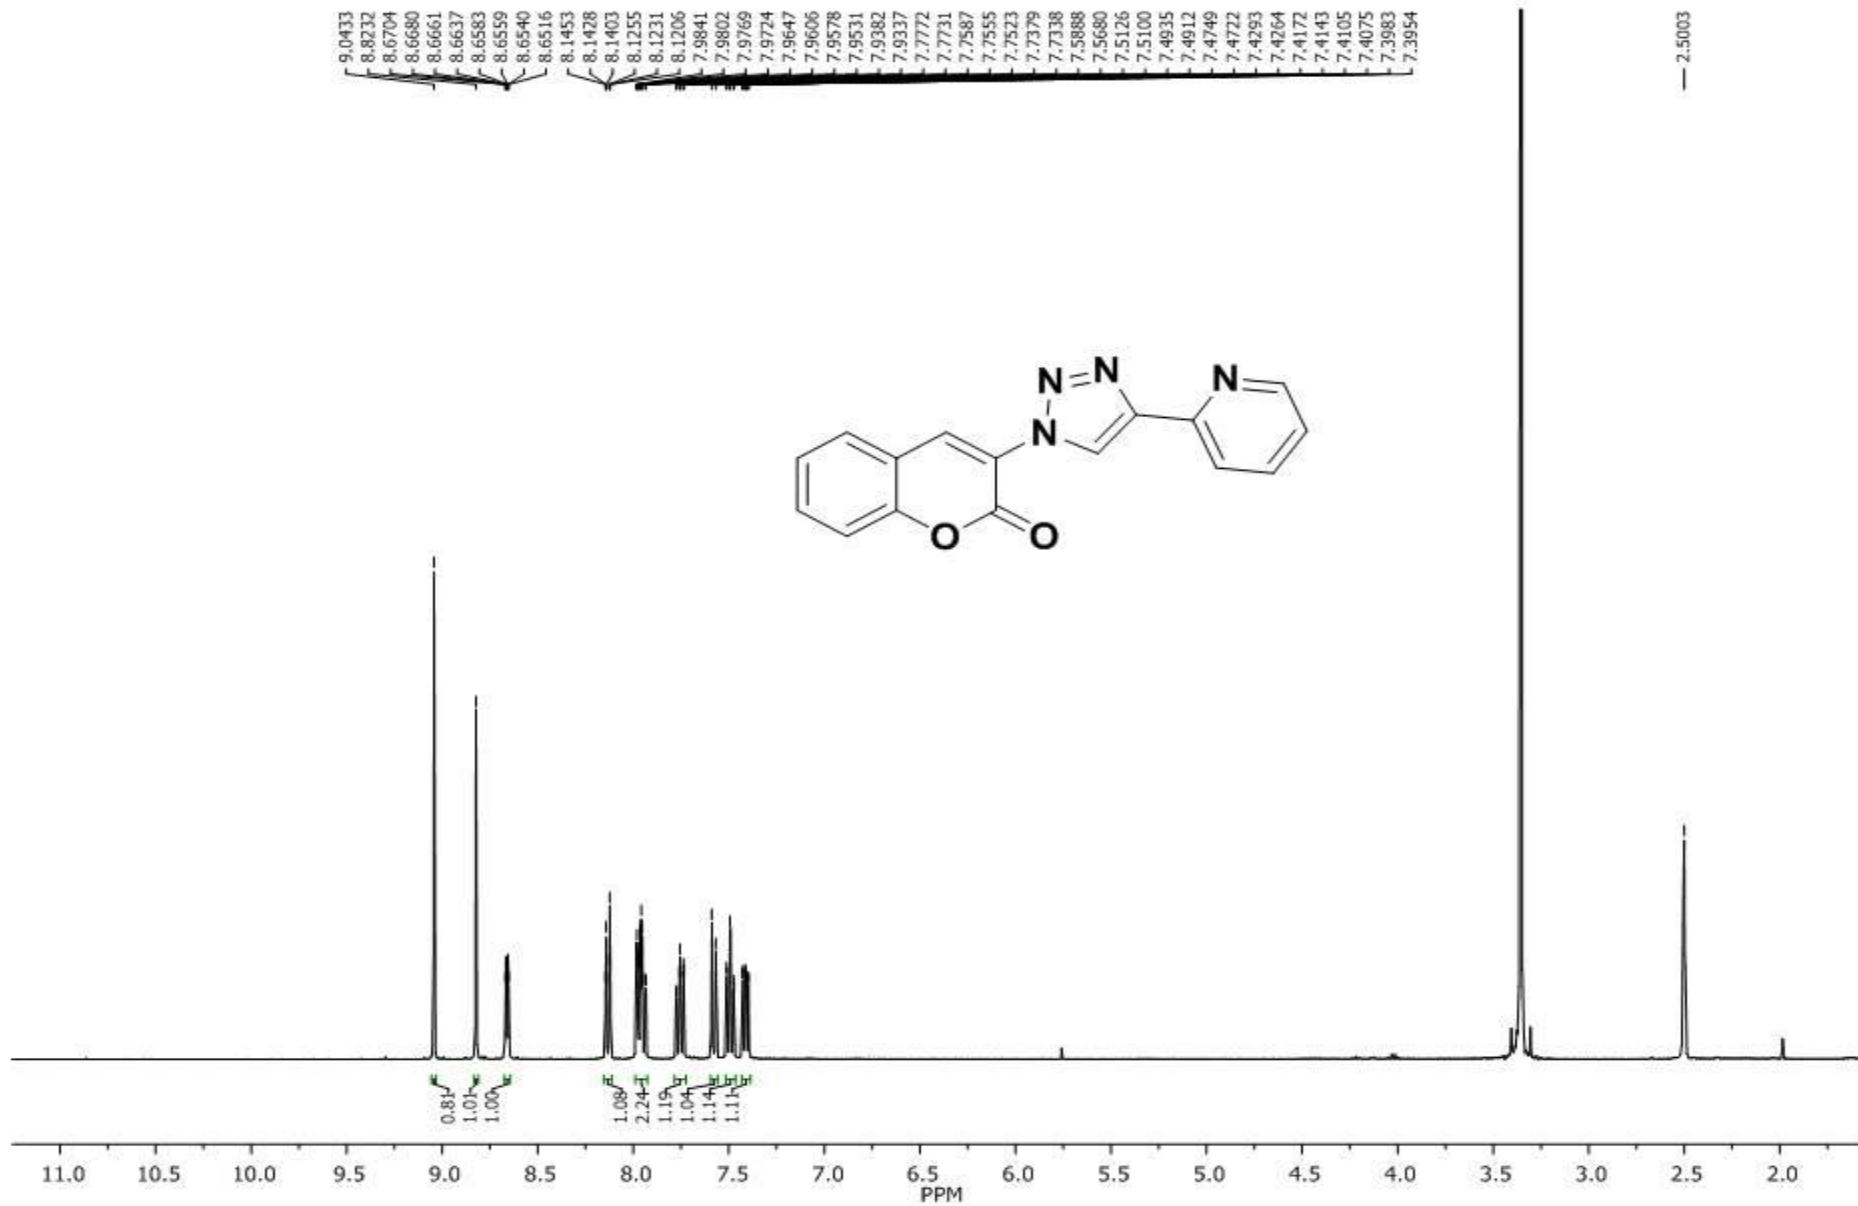

$^{13}\text{C}$ -NMR spectrum for compound 3-(4-(pyridin-2-yl)-1*H*-1,2,3-triazol-1-yl)-2*H*-chromen-2-one (**51**)

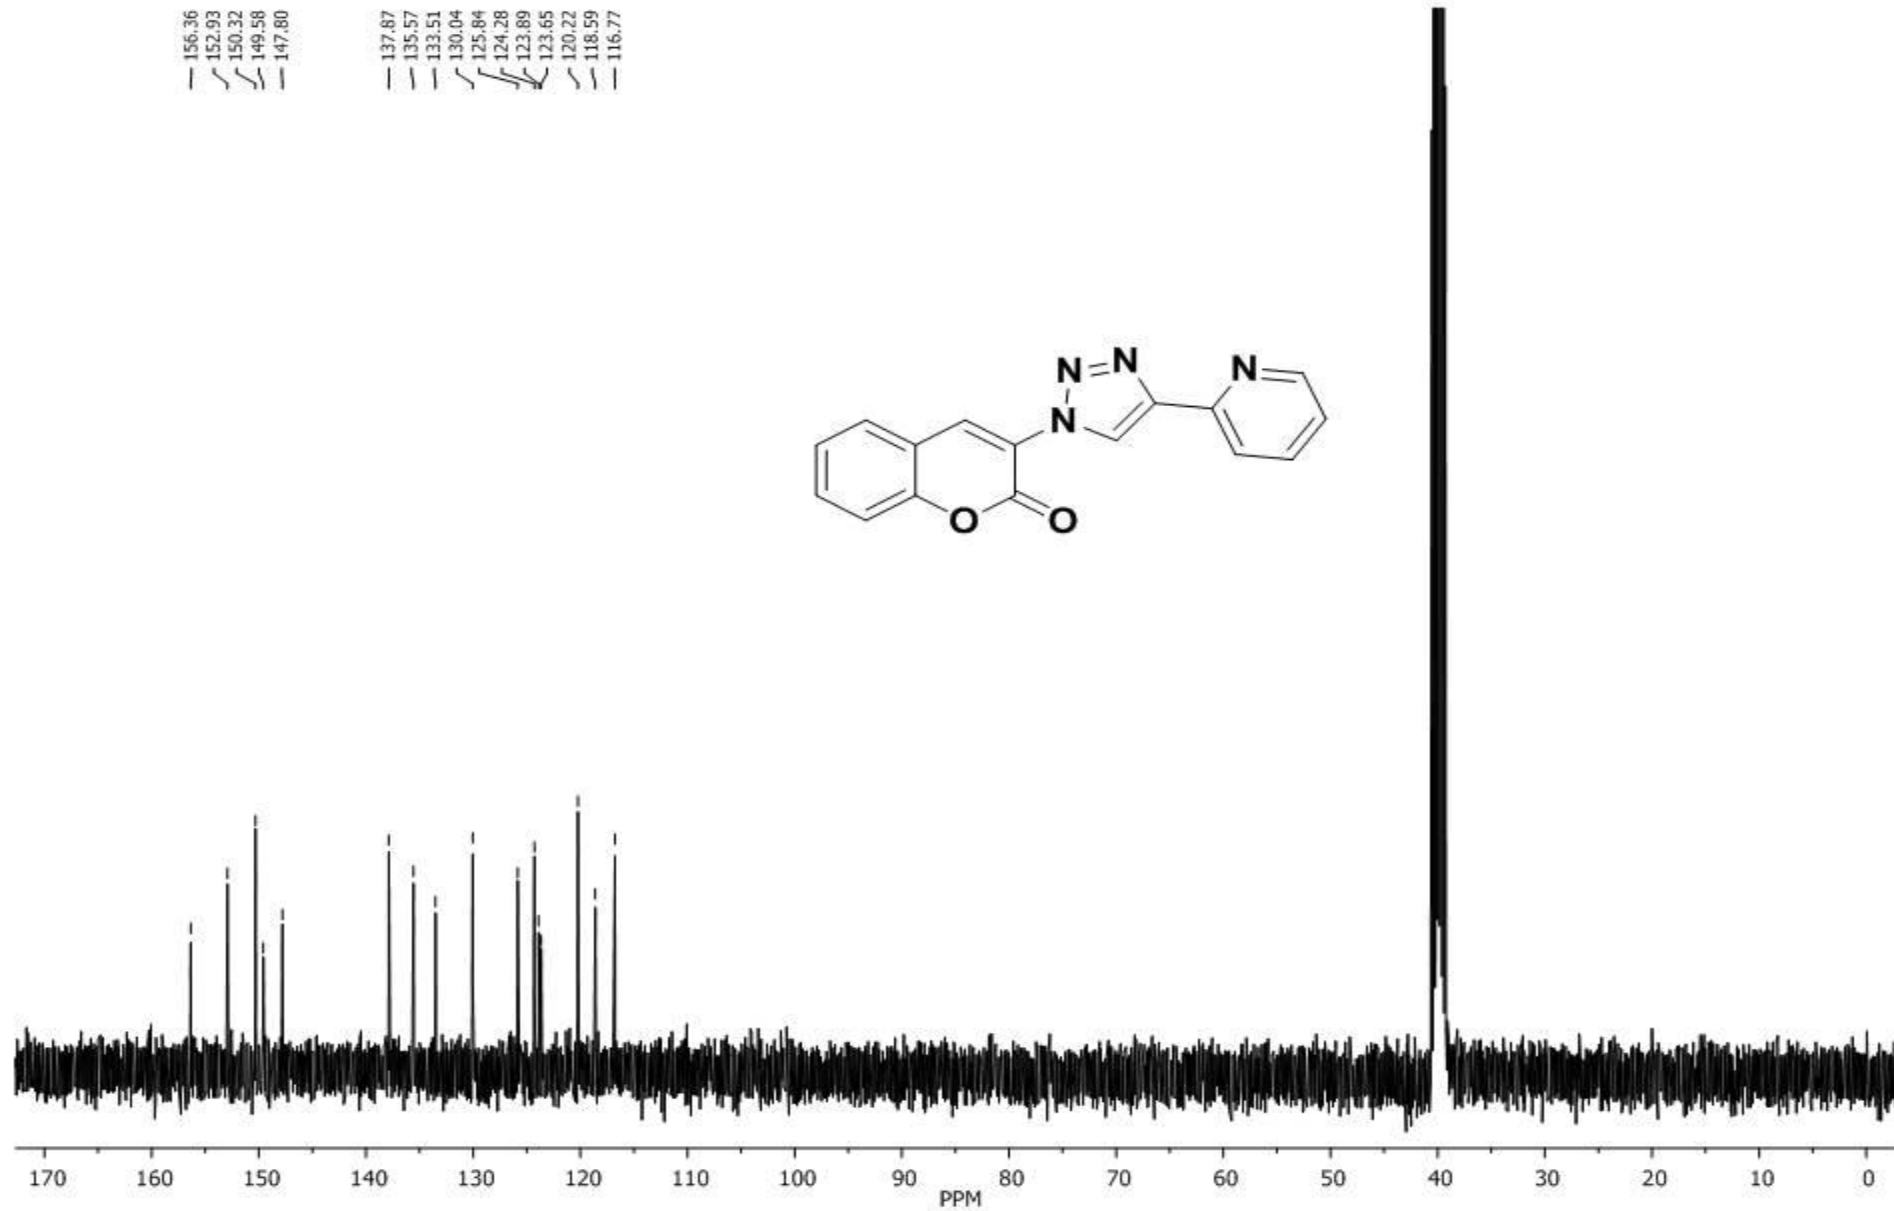

Supplement: c6ce01041e1.pdf [file c6ce01041e1.pdf]
